# Supplementary material
Source: PubMed Central journal article supplement (PMC4000046)
Supplement: NIHMS558515-supplement-supplementary_data.pdf [file NIHMS558515-supplement-supplementary_data.pdf]

## Supplementary Figures

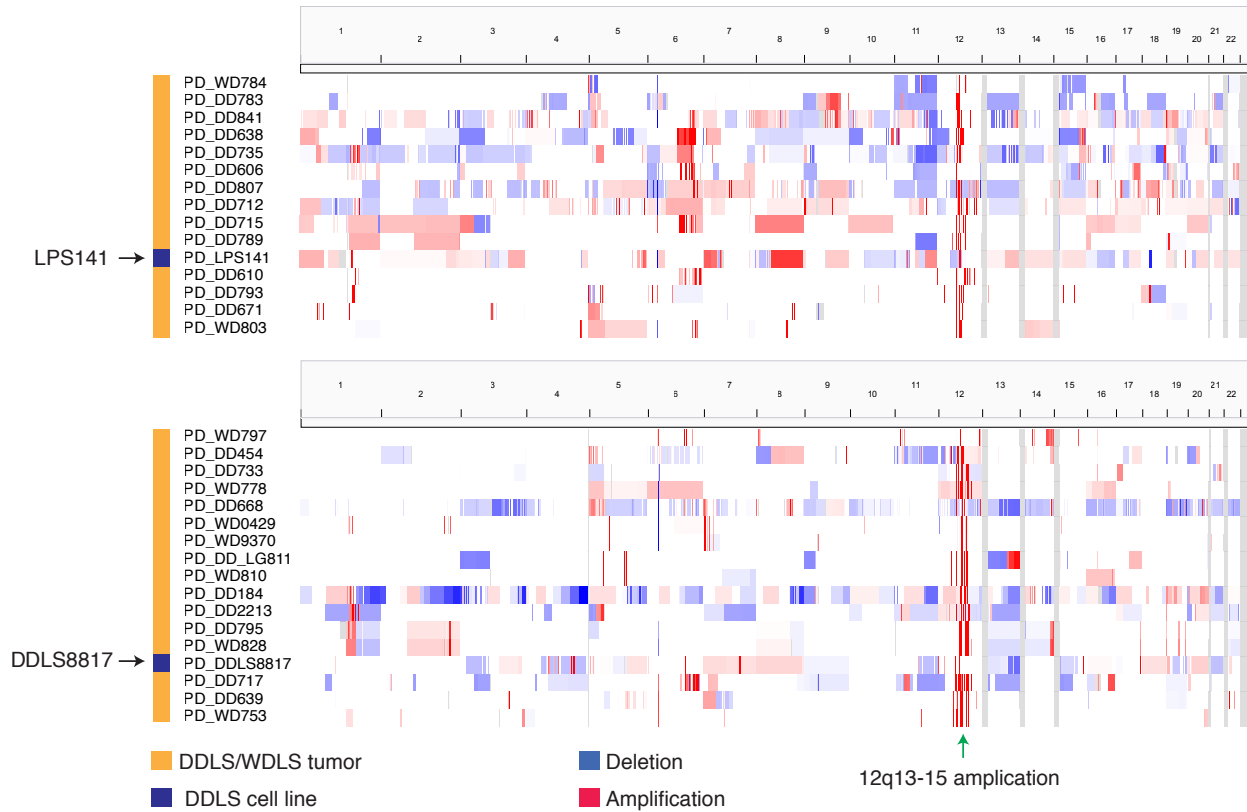

**Figure S1: WDLs/DDLS tumors and the two cell lines used in this study have complex DNA copy number alterations.** Unified break points of DNA copy numbers of a set of WDLs and DDLS tumors and tumor-derived cell lines profiled with array-comparative genomic hybridization (aCGH, Agilent 244K array) and analyzed with the RAE algorithm (53). RAE scores were clustered using the Manhattan length as distances measure. Two IGV-viewer snap shots centered around DDLS8817 and LPS141 are shown. In this work, we selected the two cell lines, DDLS8817 and LPS141, which are derived from patients with dedifferentiated liposarcoma. Similar to WDLs/DDLS tumors, the selected cell lines exhibit complex DNA alterations across the genome. Furthermore, the cell lines also have the distinct hall-mark of WDLs/DDLS: focal amplification of 12q13-15 (green arrow) harboring the oncogenes *CDK4*, *HMGA*, and *MDM2*. Note that the cell lines do not form their own outliers when clustered with tumors, indicating that the selected cell lines have alterations in common with the WDLs/DDLS tumors. CNA data from tumor samples were obtained from Crago et al., 2012 (19).

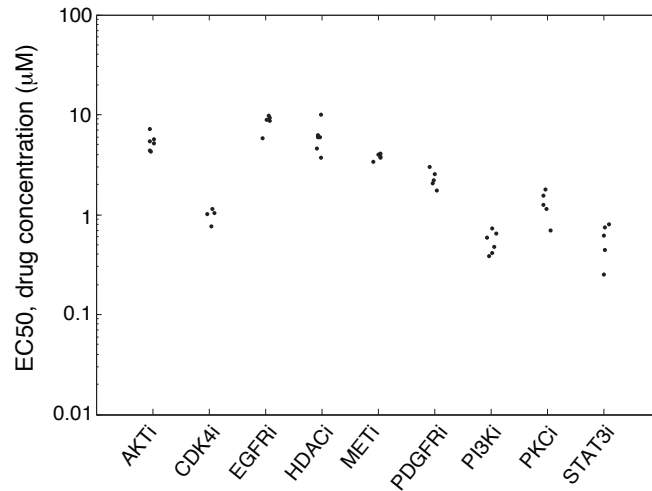

Figure S2: **EC50 determination using a cell metabolic activity assay shows good agreement between biological replicates.** DDLS8817 cells were grown in 96 well plates and perturbed with seven different concentrations of each drug and the effect on cell metabolic activity (a correlate of cell viability) was measured by the Resazurin assay after three days of drug treatment. Inhibitors of specific gene targets as indicated (for example AKTi for AKT inhibitor). For list drugs used please see **table S1**. After normalization to untreated controls (DMSO), EC50 values were obtained from sigmoid fitted dose-response curves. At least four independent biological replicates of the EC50 determination are depicted.

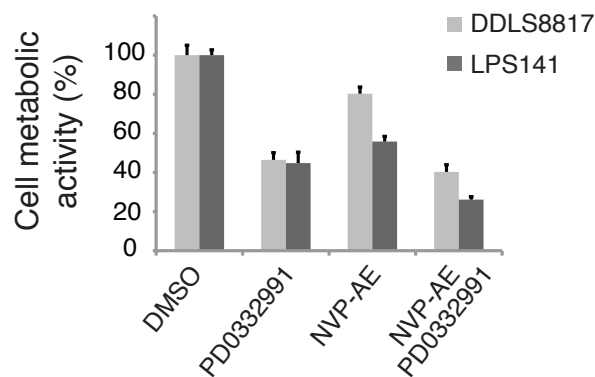

Figure S3: **Effects of PD0332991 and NVP-AEW541 in DDLS8817 and LPS141 cells.** Drug effect on cell proliferation was tested using the CCK-8 assay after 6 days of drug treatment with 1  $\mu$ M of the small molecule NVP-AEW541 (IGF1Ri), or with 1  $\mu$ M PD0332991 (CDK4i), or with both drugs in combination. Cell metabolic activity (viability) was normalized to non-treated controls (DMSO). Error bars represents standard deviation of five biological replicates.

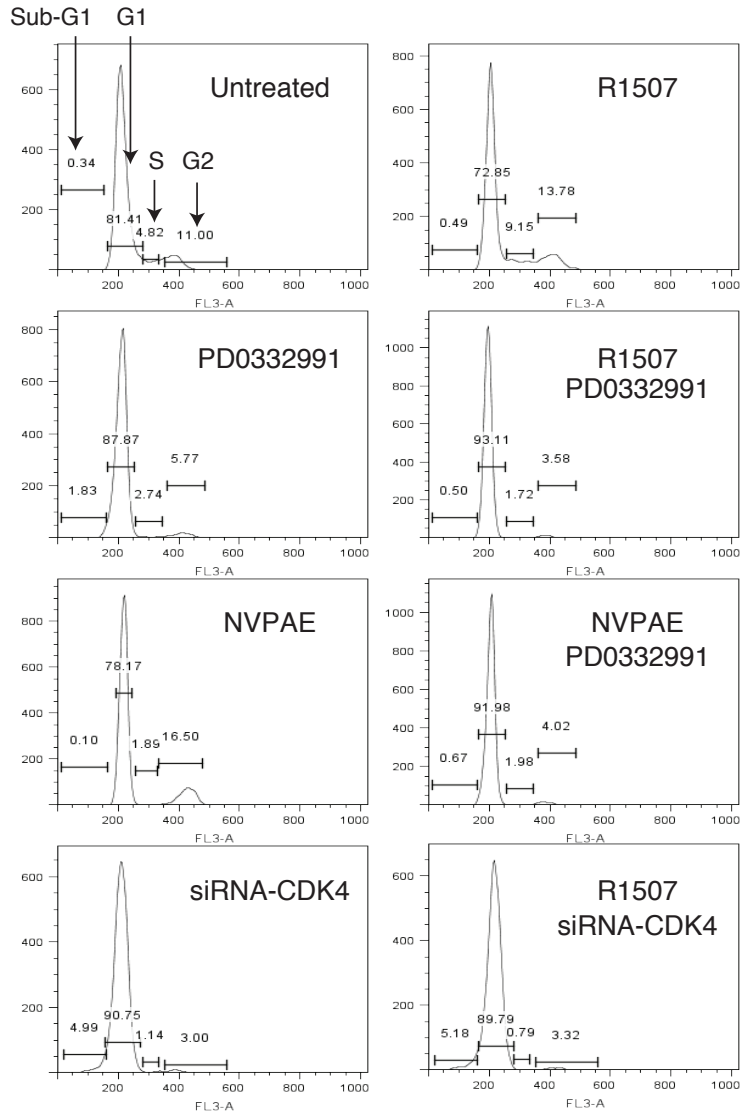

Figure S4: **CDK4 inhibition causes G1 cell cycle arrest in LPS141 cells.** Cellular DNA content measured by flow cytometry of LPS141 cells treated for 24 hours with 1  $\mu$ M of PD0332991 (CDK4i), 10  $\mu$ g/mL R1507 (anti-IGF1R antibody), or 1  $\mu$ M of NVP-AEW541 (IGF1Ri), or siRNA targeted to CDK4. Note that PD0332991 and CDK4-siRNA treatment both result in a pronounced G1 arrest making the effects of the combination treatments difficult to assess. However, compared to single treatment with PD0332991, the combined inhibition with PD0332991 and R1507 results in small but noticeably enhanced G1 arrest. The data depicted are representative data of at least two independently performed experiments.

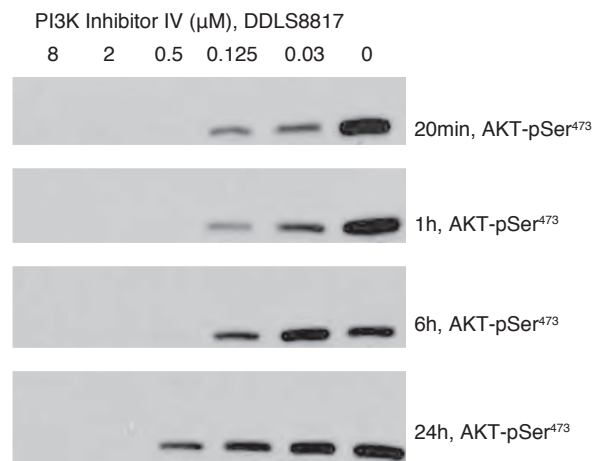

Figure S5: **Phosphorylation of AKT in DDLS8817 cells is consistently suppressed for at least 24h after PI3K inhibition.** To determine an appropriate time-frame for proteomic profiling with RPPA, we tested the effect of PI3K inhibition (PI3K inhibitor IV) at the indicated time points using Western blotting for phosphorylated AKT (at Ser<sup>473</sup>). Note that phosphorylation of AKT is consistently suppressed in the time period tested, although higher concentrations are needed to obtain the same effect at later time points. The data depicted are representative data.

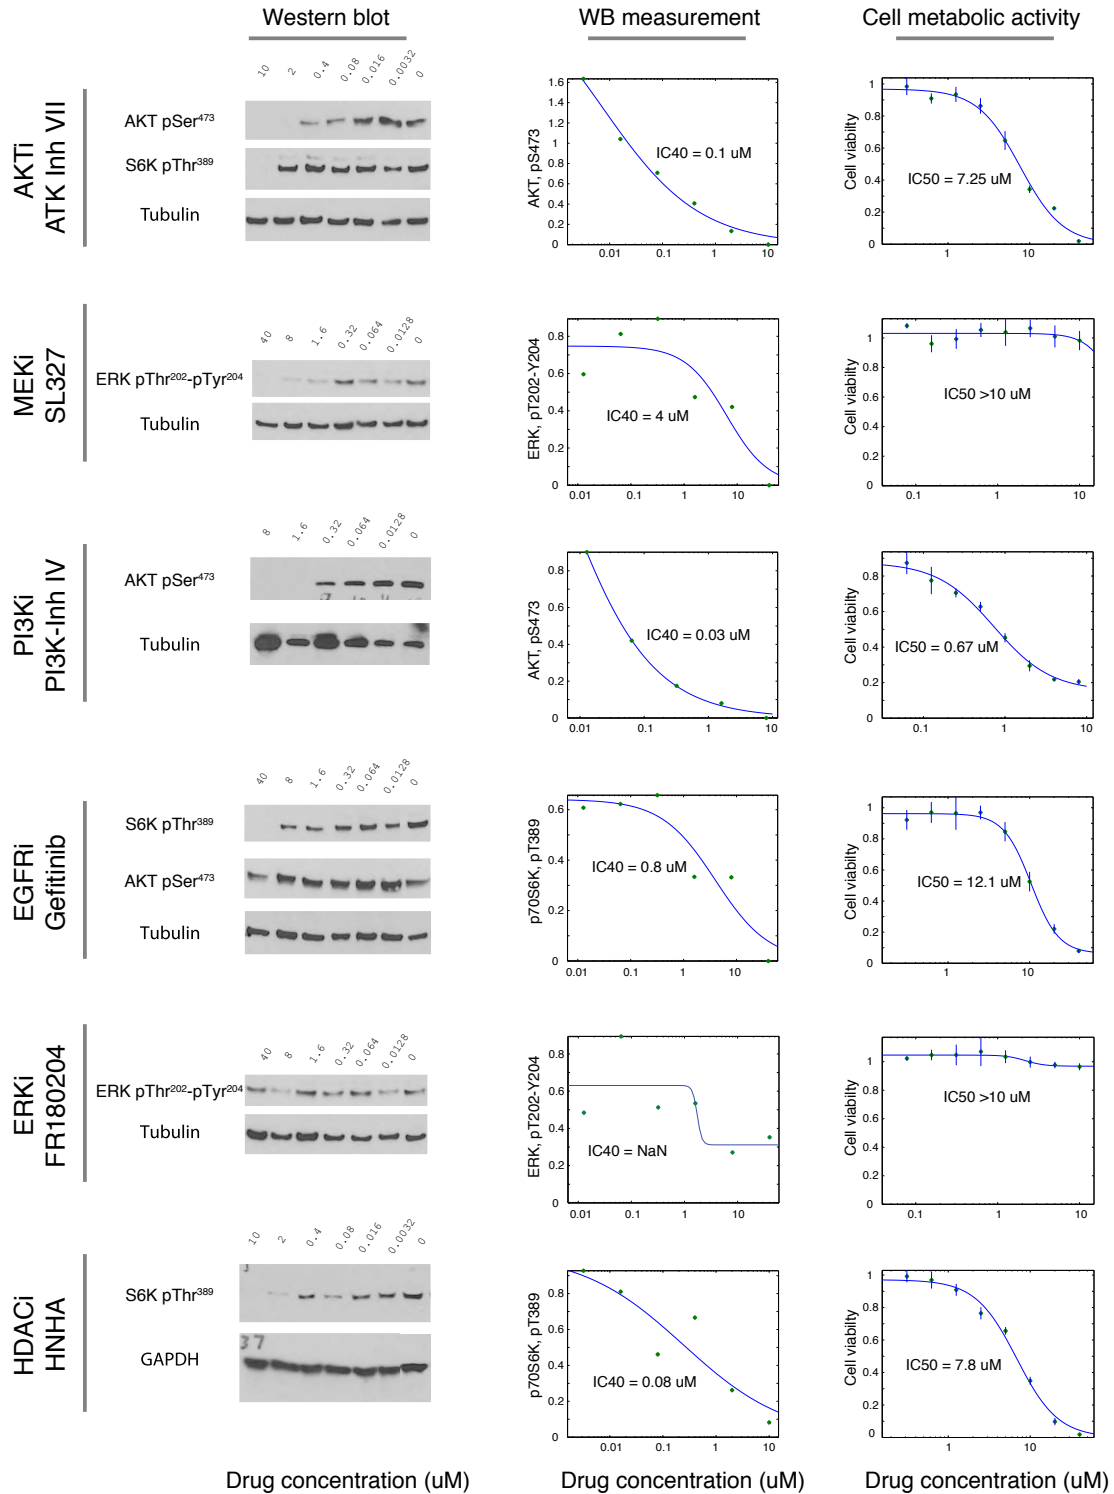

Figure S6: **Examples of determining the appropriate drug concentration for RPPA-based proteomic profiling in DDLS8817 cells.** To select a suitable drug concentration for our systematic perturbation screen using the RPPA assay, we tested each drug by measuring the effect on the presumed drug target or down-stream target using Western blotting. Drugs were administered for 24h before cell lysis was performed. The Western blot data depicted are representative data. In cases where protein-based IC<sub>40</sub> levels could be determined (middle panel), the corresponding drug concentration was used in the RPPA-screen. For comparison, the effect on cell viability based on cell metabolic activity is shown (right panel, 72h treatment, Resazurin assay). Error bars represent standard deviation of at least four biological replicates. Note that the doses needed for observing changes on a molecular level is about an order of magnitude lower than those needed for observing effects on a phenotypic level.

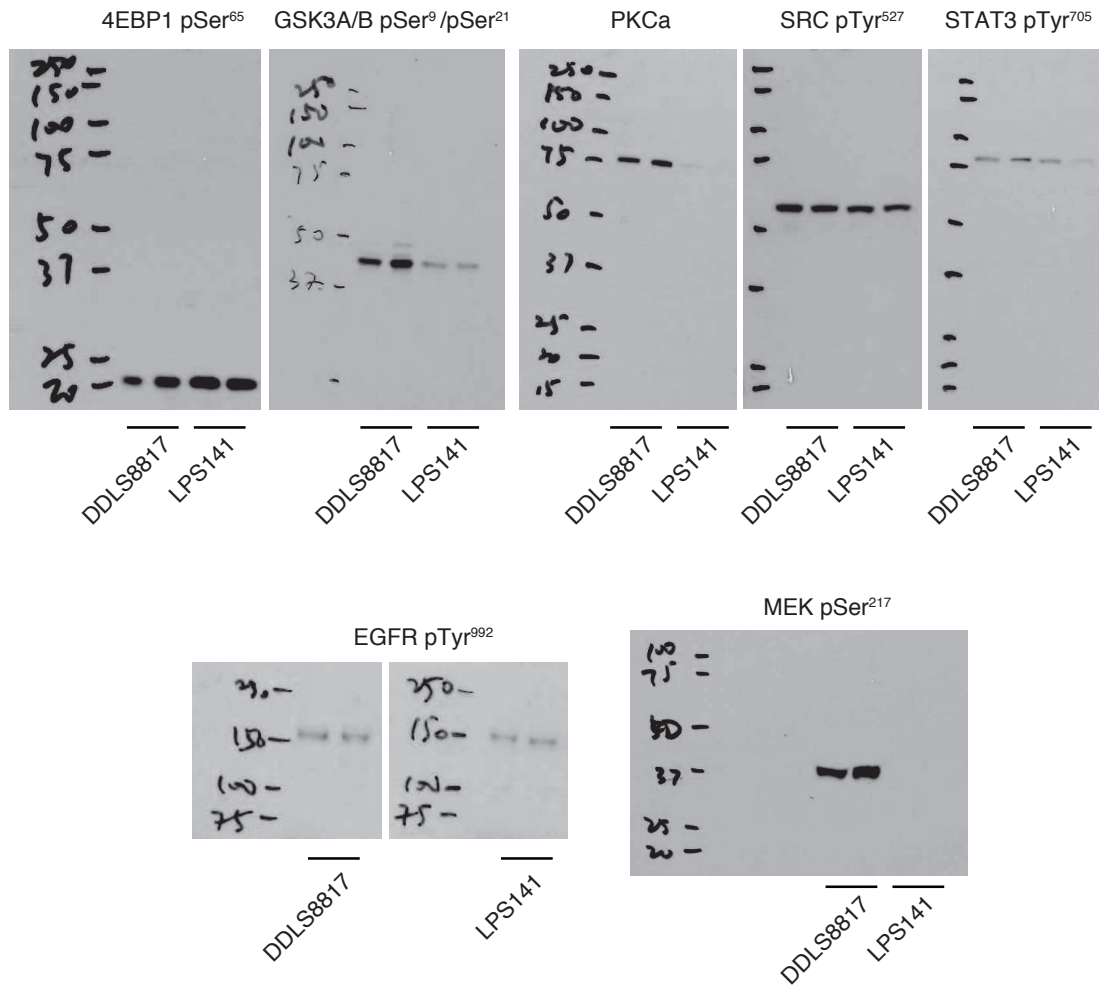

Figure S7: **Western blot testing of antibodies used in the RPPA assay shows no apparent cross-reactivity.** Lack of antibody specificity is a potential concern with the RPPA technique as antibody cross-reactivity with non-target antigens are not readily apparent compared to other methods that use protein size separation (e.g. Western blotting). To address this concern, we collected protein lysate from both DDLS8817 and LPS141 cells and performed Western blot analysis using the set of antibodies that were used in the RPPA experiment but that had not been validated already (for the additional antibodies, please see **Fig. 7A** and **B** in the main text). Each cell line was assayed using two biological replicates. Note that for all antibody tested, the only band that appears on the blot is the band that corresponds to the molecular weight of the antibody target (protein ladder is indicated). For LPS141, which was not used in the RPPA assay and therefore not in the network modeling, the signal for PKCa and phosphorylated MEK (at Ser<sup>217</sup>) were below detection. These results indicate that the antibodies used in the RPPA assay have no apparent cross-reactivity in the cell lines analyzed in this study.

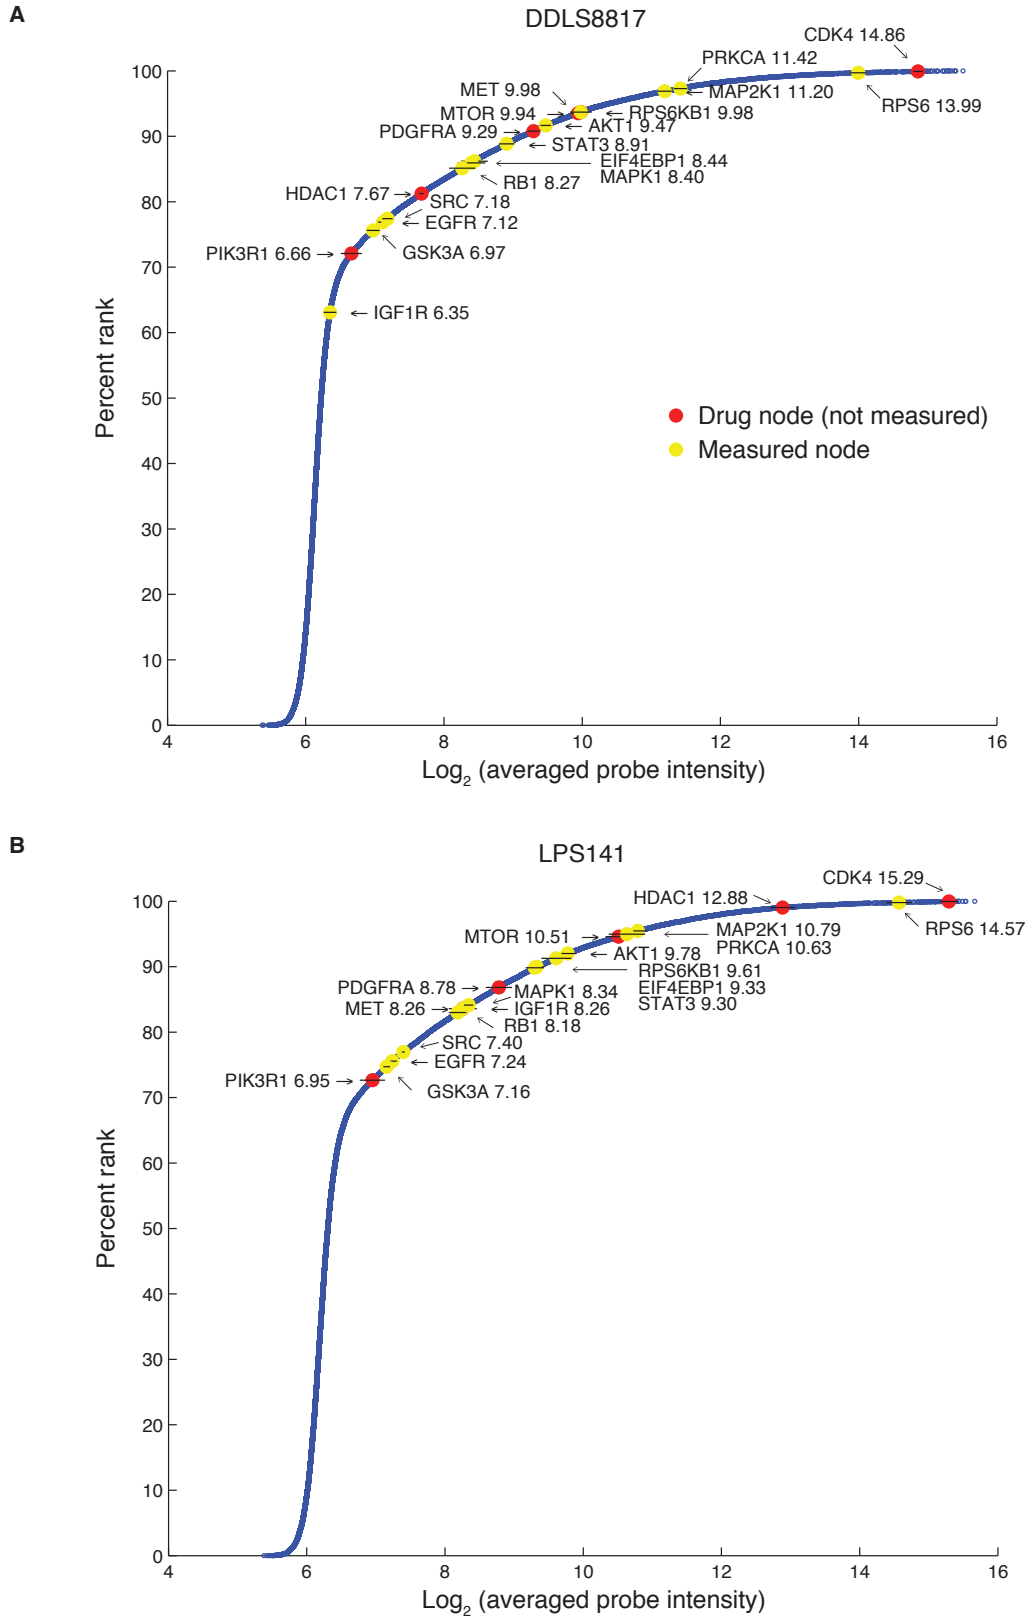

Figure S8: **mRNA expression of nodes in the network fall in the top half of all genes in both cell lines used.** Ranked mRNA transcript expression for all genes in DDLS8817 (A) and LPS141 (B) cells growing in basal conditions. Transcripts were profiled using the Illumina HT 12 V3 platform and genes with multiple probes were averaged. Highlighted are genes in the network that were measured (yellow) and genes that were only inhibited but not measured (red). Error bars represent standard deviation of three biological replicates. For clarity, error bars are only displayed for nodes used in the network.

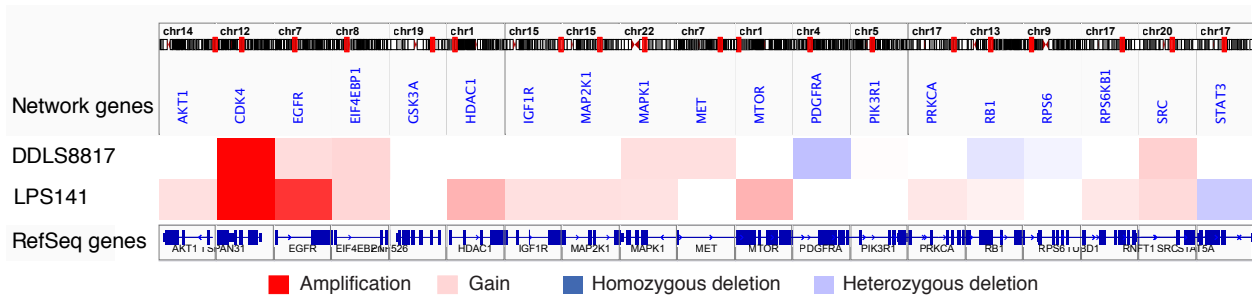

Figure S9: **DNA copy number analysis of network genes shows copy gains in multiple genes and amplification of CDK4.** An IGV-viewer snap shot of unified break points of DNA copy numbers of DDLS8817 and LPS141 cells profiled with Agilent 244K array comparative genomic hybridization (aCGH) and analyzed with the RAE algorithm (53). Only the genes used in the network models are displayed. Note that while multiple of the genes studied have copy number gains, only CDK4 for DDLS8817 and LPS141 and EGFR for LPS141 have high-level amplifications. No homozygous deletions were detected.

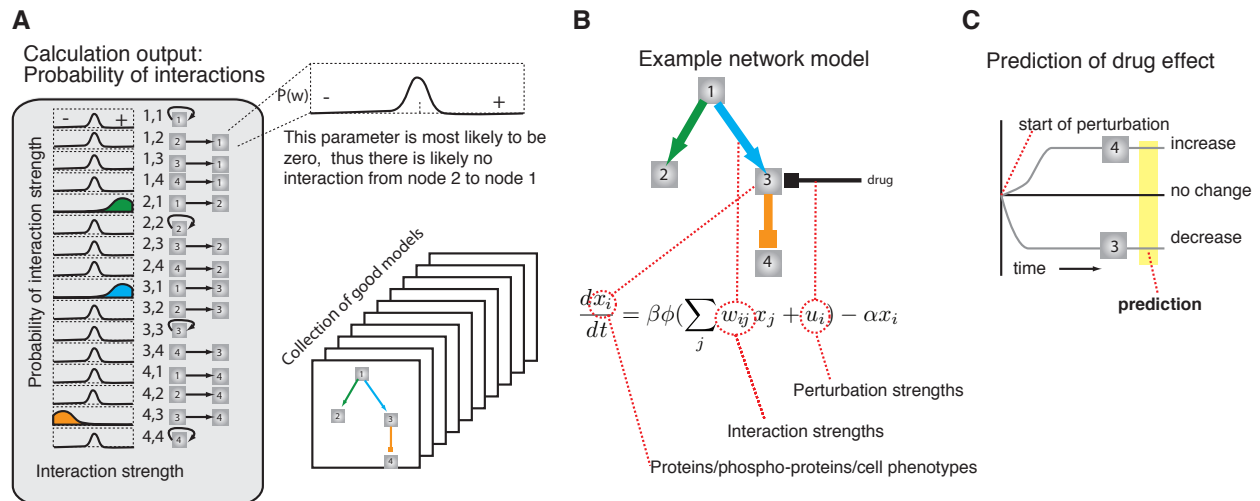

Figure S10: **Schematic illustration of the computational analysis on a fictional 4-node system.** **A**, Belief propagation produces probability distributions for each of the  $N^2$  possible model parameters. Individual models are created by drawing from these probability distributions accordingly. **B**, A single executable model connects interacting nodes. The model equation describes the dynamics of the model in response to an external perturbation (black line,  $u_i$ ). **C**, An example simulation in response to inhibition of the third node relaxes to a steady state. We take this steady state to be the model-predicted response of the cell to this perturbation condition.



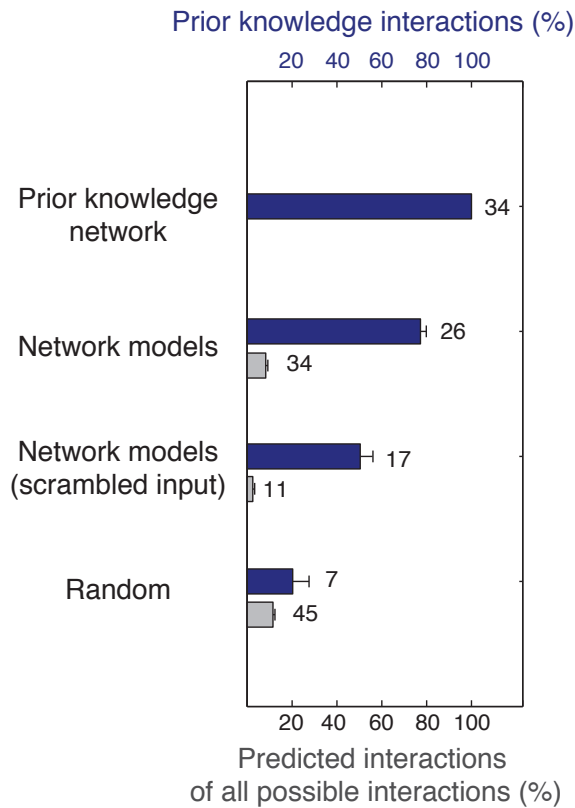

Figure S11: **Network models are not over-fitted to prior knowledge interactions.** Bar chart depicting the percent of prior knowledge interactions (total of 34) that are retained in the inferred networks under different conditions. Incorporating prior knowledge interactions for network modeling has several advantages (see Discussion), but a potential concern is that the models are too constrained to the prior knowledge interactions. Not all prior knowledge interactions (blue bars) are retained in the network models (26 out of 34), reflecting that prior knowledge interactions are softly encoded in our modeling approach and are rejected if they do not fit with the perturbation-response profiles. Scrambling the input data reduces the number of retained prior knowledge interactions significantly (from 26 to 17  $p < 6.2E-13$ , student's t-test). This shows that the models are not over-fitted to the prior knowledge interactions as many of these are supported by perturbation-response data. The random chance of capturing the prior knowledge interactions out of the total set of interactions is indicated. Gray bars represent the number of predicted interactions of all possible interactions (378 with 14 measured nodes and 14 activity nodes). Error bars represent standard deviation of 14 leave-k-out cross-validation sets.

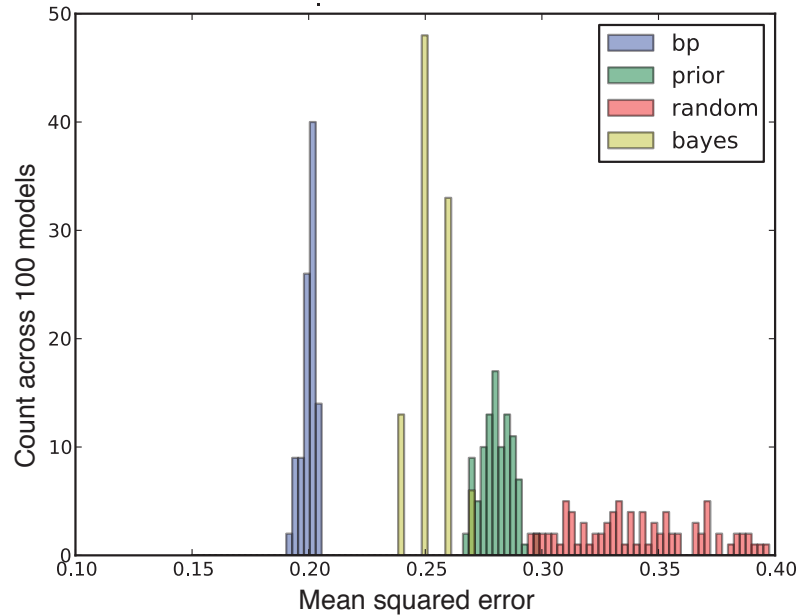

Figure S12: **BP improves performance of prior knowledge interactions alone.** We evaluate model performance with the mean squared error (MSE), which is here calculated as the sum of squared error between measured and model estimated data points normalized by the number of data points. It is difficult, however, to know how meaningful any MSE value is. We therefore calculate the MSE on a set of random models (red distribution). The random models are constrained to have the same number of positive and negative interactions as in the prior-knowledge network, but are otherwise randomly parametrized. The prior-knowledge topology, optimized with 100 uniquely initialized parameter assignments (green distribution), perform better than random models as is evident by the nearly complete separation between the two distributions. This separation suggest that while the prior knowledge models by themselves are not the best performing models, they do collectively describe models that are more consistent with the data than one would expect by random. The prior knowledge interactions are used to guide Bayesian Network inference (58, 59) (with BioLearn 1.0 software), which yield even better performing models (yellow distribution). BioLearn was run with the prior knowledge network incorporated as the starting search topology, and 100 topologies were then produced, converted into ODE models, and optimized with the same gradient descent method used for this work (57). The prior-knowledge guided BP-derived models (blue distribution) clearly demonstrate improved performance compared to all three other methods, suggesting that indeed BP adds significant descriptive value to the set of prior knowledge interactions selected in this work.

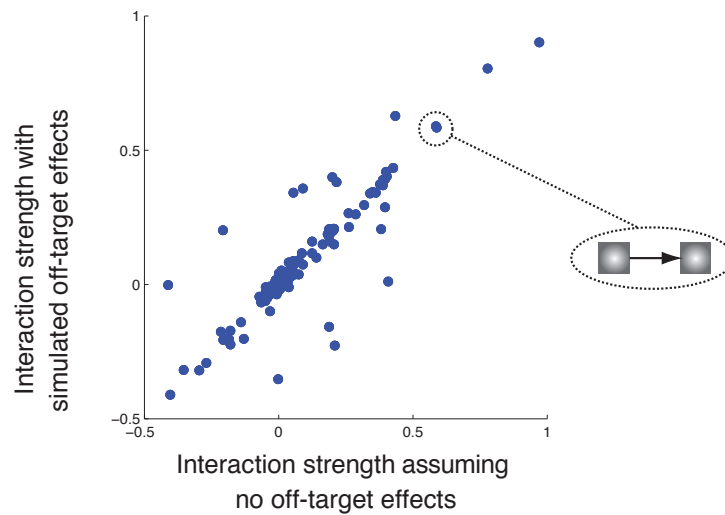

Figure S13: **BP inference is minimally sensitive to drug-specificity.** Values on the x-axis are BP distribution averages when we assume no off-target effects; each drug acts on a single model target. Values on the y-axis are BP distribution averages when randomly added off-target contributions are assumed (random values between 0 and  $-0.5$  corresponding to half max perturbation strength); each drug acts predictably on its main target but also influences other nodes. This analysis suggests that BP is not prohibitively sensitive to exact knowledge of all off-target effects.

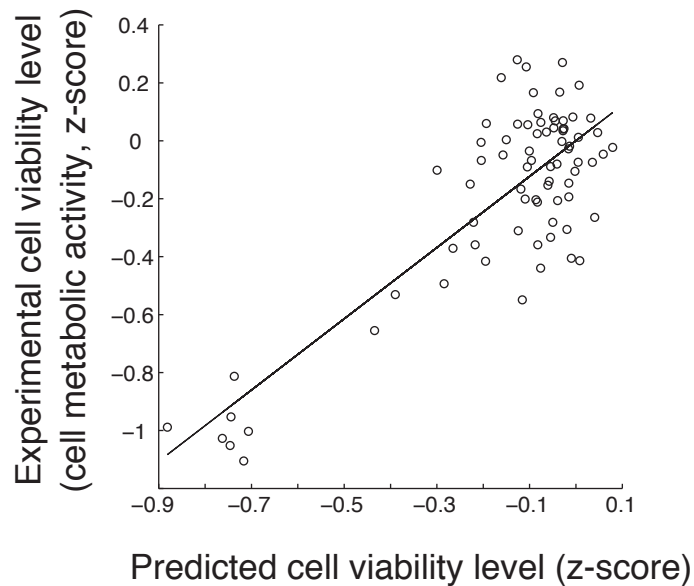

Figure S14: **Liposarcoma-specific network models are predictive of cell response to drugs.** Using the 100 lowest error models from each of the leave-k-out network models, the activity node (drug target) in question was inhibited in combination with all other nodes and the effect on the cell viability node was recorded. We found a reasonable correlation between the experimental and predicted inhibition of cell viability (Pearson Correlation Coefficient = 0.815). Experimental cell viability was estimated by cell metabolic activity measurements using the Resazurin assay. As the predicted effect on cell viability relies on the information being propagated through the network models, this reasonable correlation indicates that the network models capture biologically relevant signaling connectivities in DDLS8817.

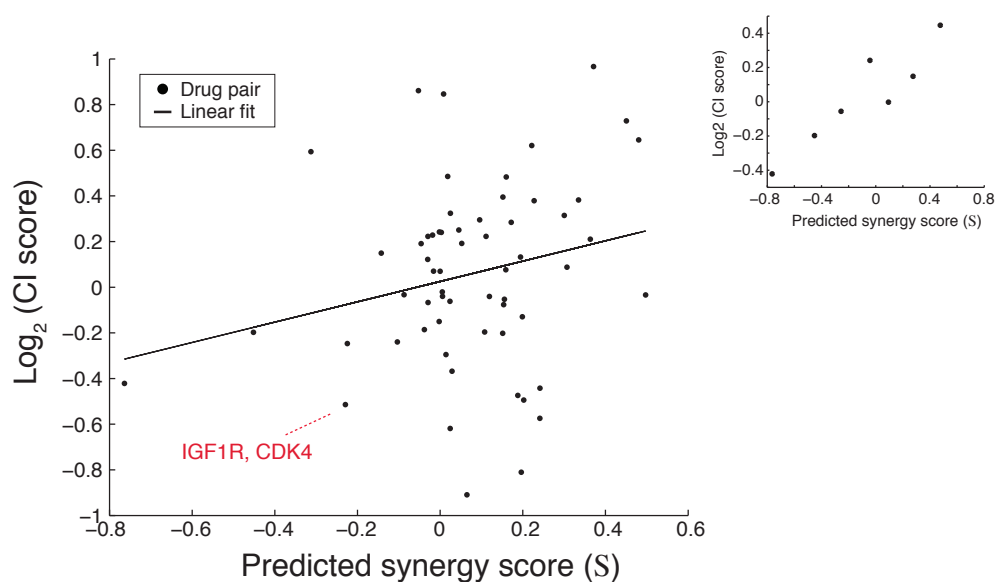

Figure S15: **Many of the drug combinations with the strongest predicted synergy scores are categorized in accordance with experiments.** The predicted synergy score,  $S$ , of each paired node inhibition was compared to the experimentally obtained synergy score [ $\log_2$  of combination index (CI) score], and a positive but non-significant correlation was found (Pearson Correlation Coefficient = 0.23,  $p = 0.07$ ). Inset shows average of synergy scores with bin sizes  $\Delta S = 0.2$ . The predicted synergy scores were obtained using the leave-k-out cross validation approach to avoid training and predicting on the same data. Note that, although many of the drug combinations with the strongest predicted synergistic and antagonistic effects were categorized in accordance with the experiments, several predictions were miscategorized (see Discussion).

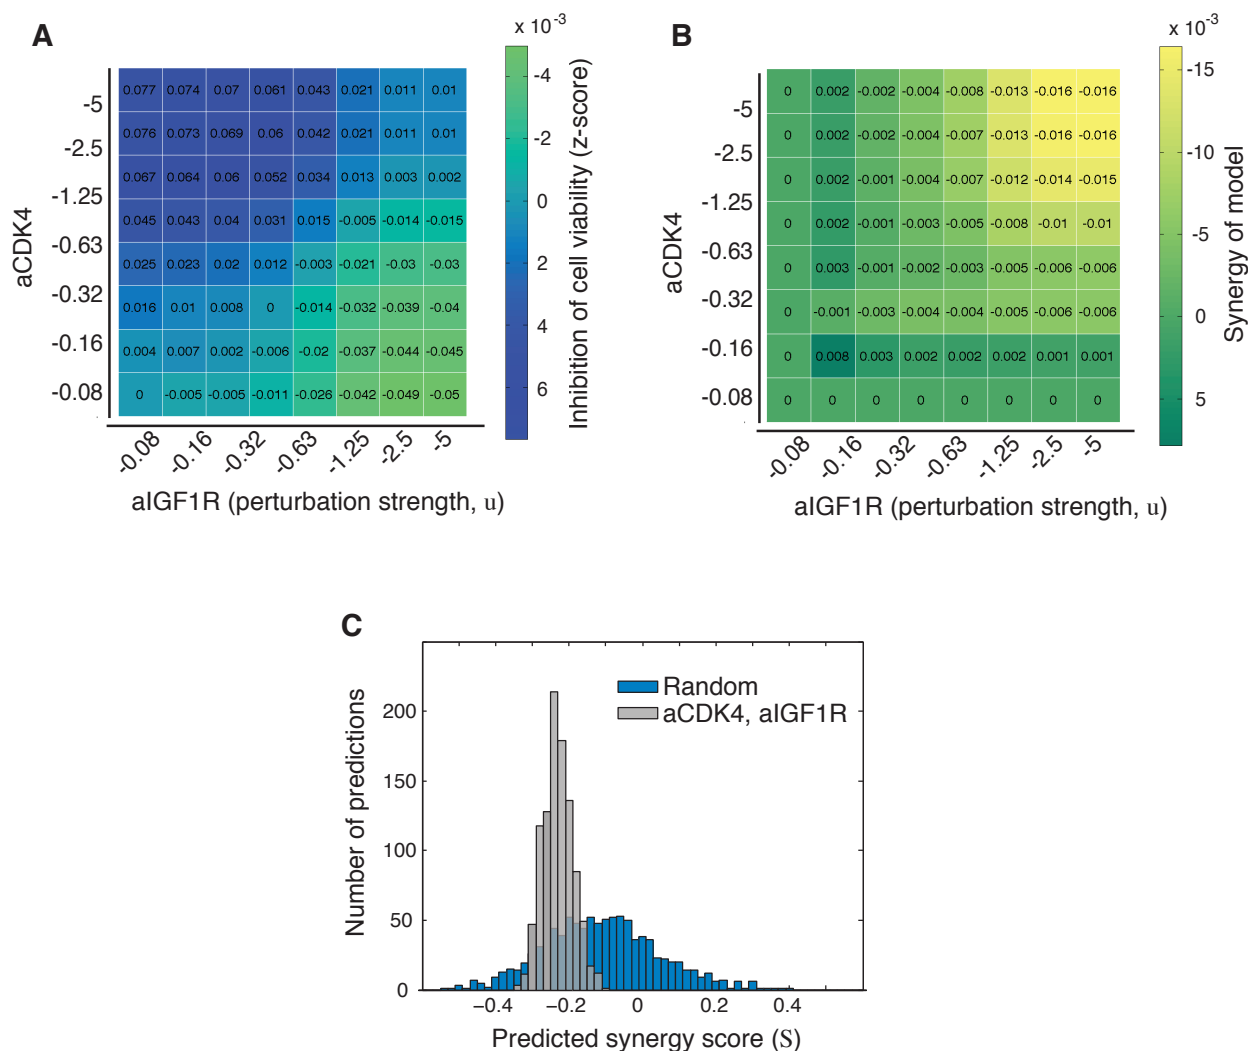

Figure S16: **Combined inhibition of the CDK4 and IGF1R nodes is predicted to be synergistic by the network models.** **A**, Using the top 100 network models based on measurements where all dual perturbations with IGF1R inhibitor were left out, the two activity nodes (drug targets) aCDK4 and aIGF1R were inhibited with eight different strengths ( $u$ ). The effect on the cell viability node was recorded where positive and negative values (z-scores) represent activating and inhibiting effects on cell viability, respectively. Note that, inhibition of aCDK4 resulted in an increase of cell viability; an effect that is consistent with our training data from low drug doses, but inconsistent with the drug synergy experiment where much higher drug doses were used. **B**, Non-additive effects were determined as the difference between the effect of the paired simulated perturbation ( $Z_{sim}$ ) and a Loewe additivity surface ( $Z_{loewe}$ ) derived from the added effects of the single node perturbations,  $S = \sum(Z_{sim} - Z_{loewe})$ . The aIGF1R and aCDK4 synergy score was calculated to  $-0.23$ . **C**, To determine if the predicted synergy score for the aIGF1R and aCDK4 combination could be expected by random chance, 75 of the top 100 models were randomly resampled 1000 times. Using these bootstrap samples, the synergy score was recalculated and the distribution of synergy scores is displayed (gray). Similarly, a background distribution of synergy scores was obtained by perturbing the same nodes in a similar procedure but using random but similarly parameterized models (blue). The two distributions were found to be significantly different ( $p < 5.5E-98$ , Wilcoxon rank test).

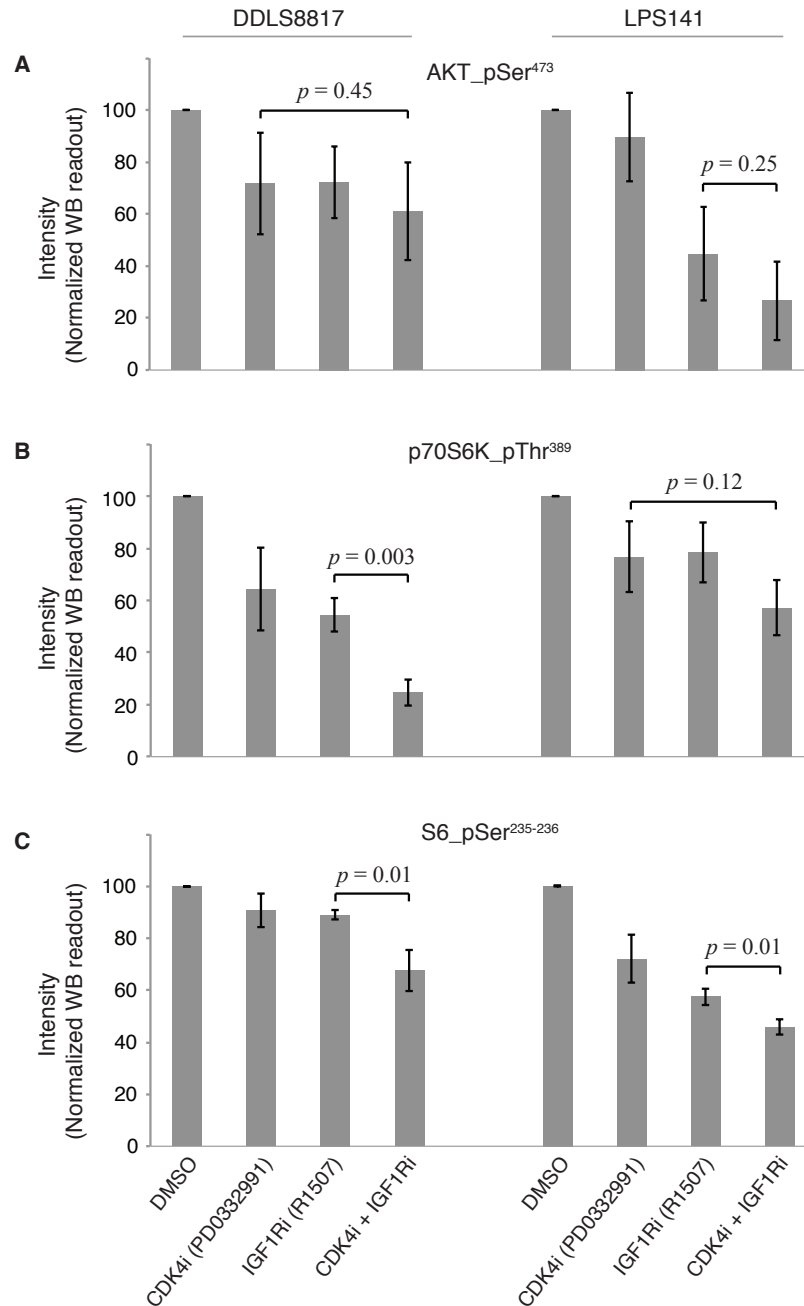

Figure S17: **Combination treatment enhances repression of mTOR signaling compared to single drug treatment.** Quantified Western blot readouts of DDLS8817 (left) and LPS141 (right) cells treated for 24 hours with the indicated conditions. The bands for the indicated antibodies were quantified using optical density analysis and the intensities were normalized to vehicle-treated control cells (DMSO). Error bars represent standard deviation of three biological replicates. Significance values using unpaired, two-tailed t-tests between the combination treatment and the strongest of the single drug treatments are indicated. Note that, while a significantly enhanced effect of the combined treatment was observed for mTOR signaling (three of four for p70S6K-pThr<sup>389</sup> and S6-pSer<sup>235-236</sup>, **BC**), a similar but non-significant trends was observed on AKT signaling (AKT-pSer<sup>473</sup>, **A**).

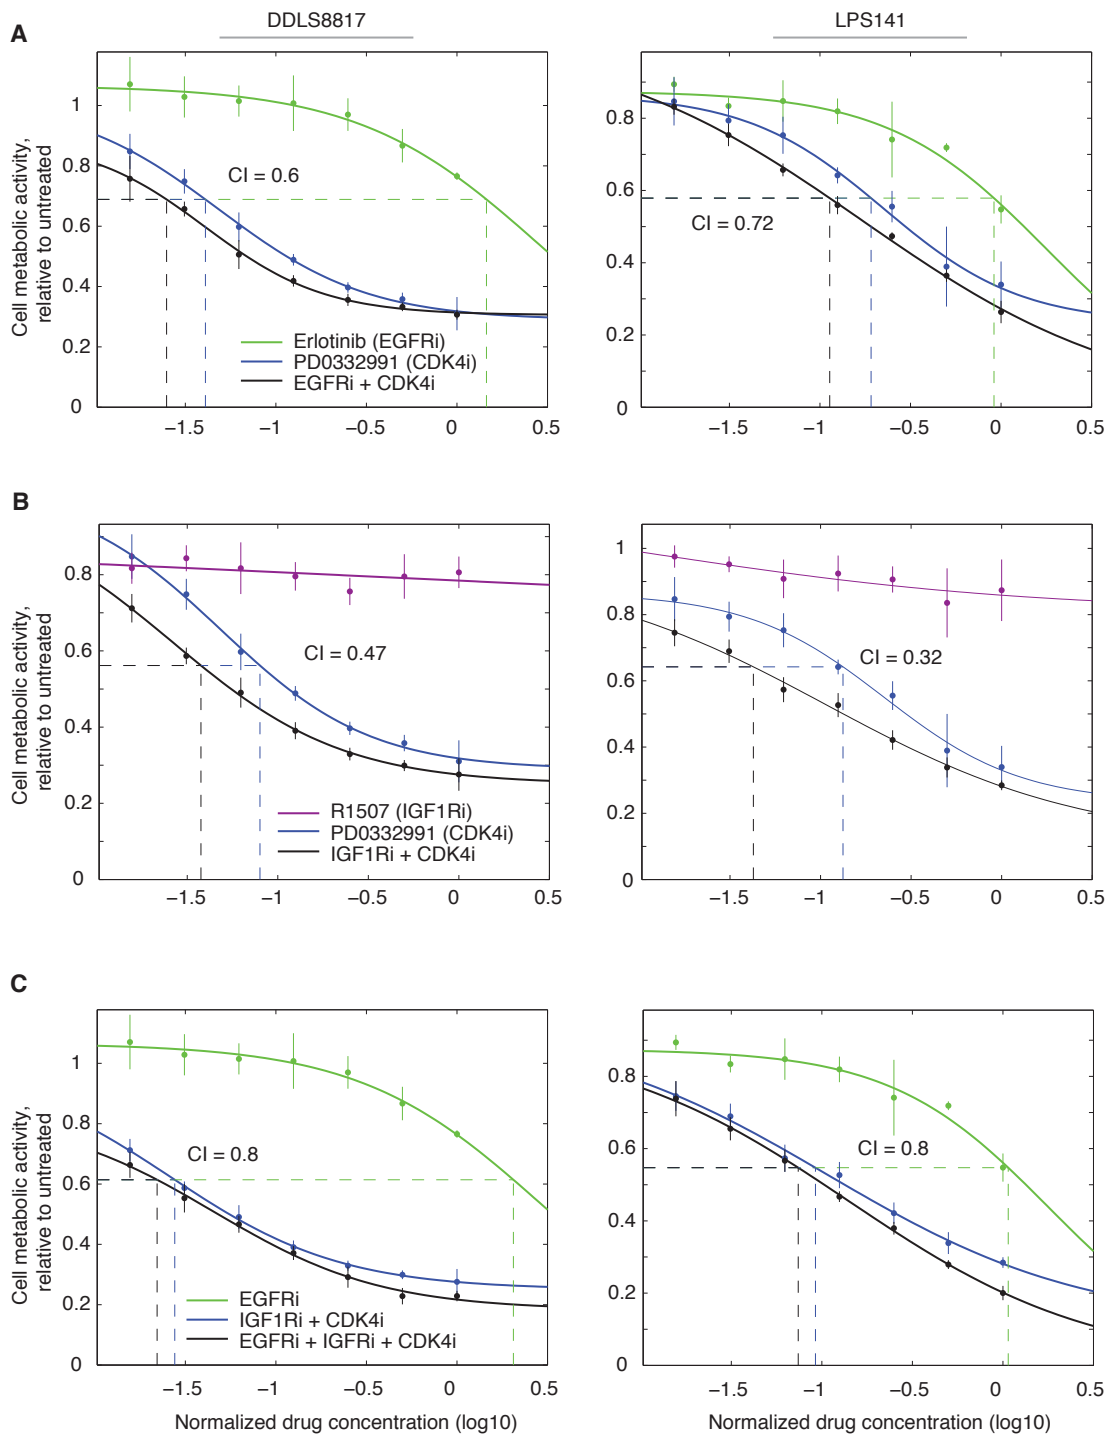

Figure S18: **Inhibition of EGFR and CDK4 has synergistic effects on cell metabolic activity and effects are enhanced in a triple perturbation adding an IGF1R inhibitor.** Dose-response measurements of cell viability based on cell metabolic activity of DDLS8817 (left panel) and LPS141 cells (right panel) after drug administration for 6 days with (A) Erlotinib (EGFRi) and PD0332991 (CDK4i), (B) R1507 (IGF1Ri) and PD0332991, and (C) all three drugs using the CCK-8 assay. In (C), single inhibition with Erlotinib and dual treatment with PD0332991 and R1507 and compared to the effect of all three drugs combined. The combination index (CI) scores were determined at EC<sub>50</sub> levels indicated by dashed lines. To compare between conditions, drug concentrations were normalized to the highest concentration used. The highest drug concentrations used were 25.6  $\mu$ M for Erlotinib, 1.28  $\mu$ M for PD0332991, and 16  $\mu$ g/ml for R1507. Error bars represent standard deviation of six biological replicates.

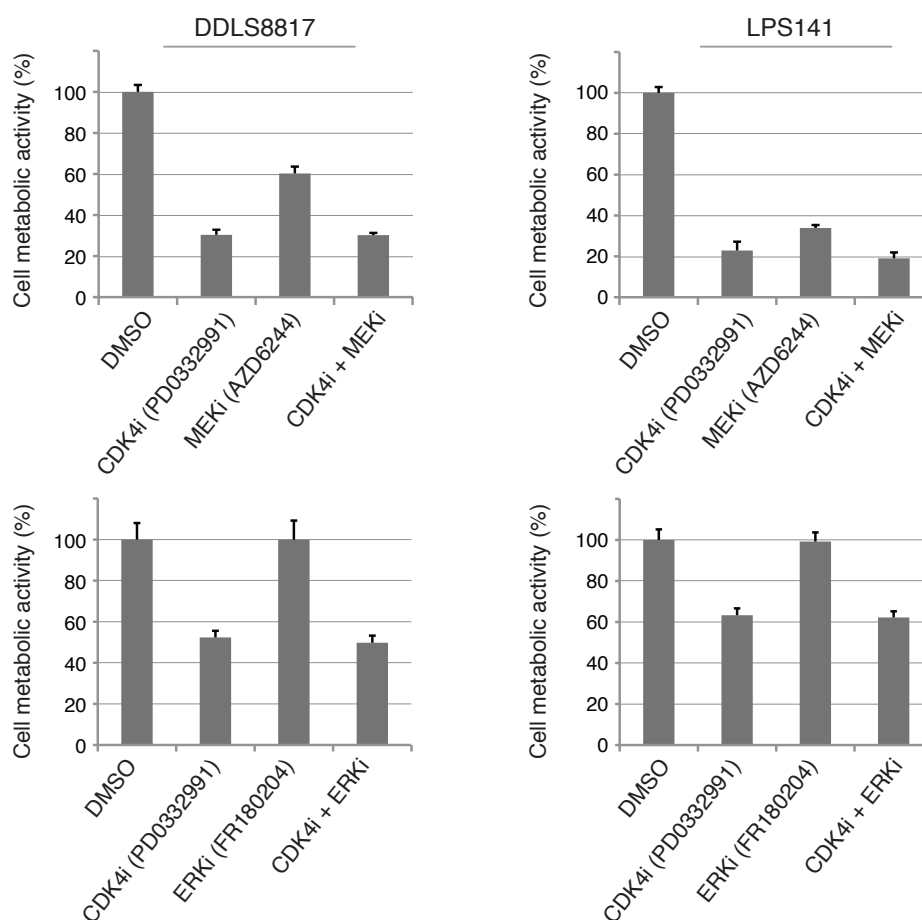

Figure S19: **Combining CDK4 inhibition with MEK or ERK inhibition does not result in synergistic effects on cell viability based on cell metabolic activity.** Cell viability based on cell metabolic activity of DDLS8817 (left panel) and LPS141 (right panel) was measured after 3 days of drug inhibition with PD0332991 (1  $\mu$ M, CDK4i), AZD6244 (1  $\mu$ M, MEKi), or FR180204 (2.5  $\mu$ M, ERKi). Cell viability was normalized to non-treated controls (DMSO). Note that the effect of combining CDK4i with ERKi or MEKi is similar to CDK4i treatment alone, indicating that MAPK-pathway inhibitors do not synergize with CDK4i. Error bars represent standard deviation of five biological replicates.



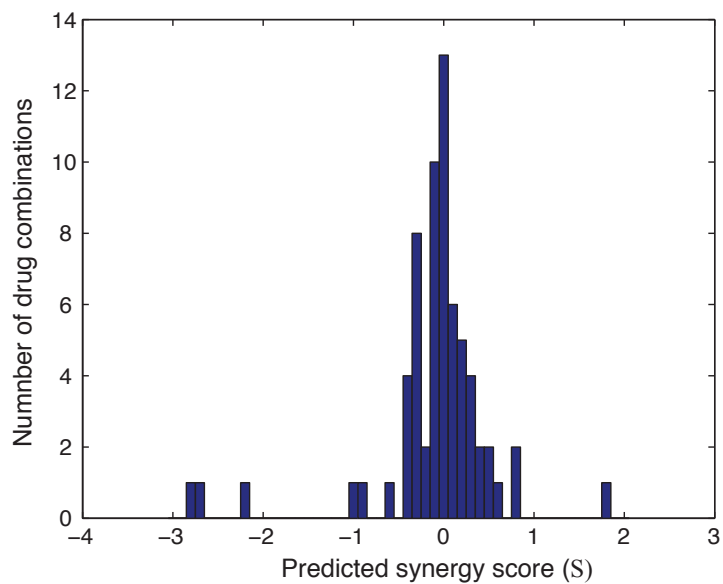

Figure S20: **Many of the top 100 models predict synergistic effects of combined CDK4 and IGF1R inhibition.** Distribution of predicted synergy scores,  $S$ , after inhibition of the CDK4 and IGF1R nodes using the top 100 models. The top 100 models were trained based on data where all drug pairs involving IGF1R inhibitor were left out. Applying the previously used cut off of  $S < -0.2$  for classifying synergy (Fig. 5, main text), 20 of the top models predicted strong synergy between CDK4 and IGF1R. Note that only 66 of the top 100 models could be used in this analysis, because 34 models resulted in activation of the cell viability node and synergy could not be computed.

## Supplementary Tables

Table S1: **Drugs used in the synergy screen (cell viability) and the proteomic screen (RPPA).** Drugs and their primary targets are listed. Genes that have also been shown to be inhibited at high concentrations are listed (Secondary Targets). The drug concentration used in the RPPA assay is indicated and was selected based on either protein IC40 measured by Western blotting (rule P for protein, see **fig. S6**) or information obtained from literature (rule L for literature). Finally, the concentration range for the drug synergy screen (based on cell viability) is listed. \*Indicates the concentration range used in dose-response cell viability experiments with 2 fold serial dilutions unless otherwise stated.

| Drug          | Primary Targets    | Secondary Targets<br>(at high conc) | Company       | Product# | Conc<br>(RPPA) | Rule | Conc*<br>(cell viability) |
|---------------|--------------------|-------------------------------------|---------------|----------|----------------|------|---------------------------|
| AG538         | IGF1R              | EGFR                                | EMD Millipore | 658403   | 0.5 $\mu$ M    | L    | 20 — 0.3 $\mu$ M          |
| AKT 1/2 Inh   | AKT1/2             |                                     | EMD Millipore | 124018   | 0.1 $\mu$ M    | P    | 20 — 0.3 $\mu$ M          |
| FR180204      | ERK1/2             | p38                                 | EMD Millipore | 328007   | 1.5 $\mu$ M    | L    | 5 — 0.08 $\mu$ M          |
| Gefitinib     | EGFR               |                                     | Tocris        | 3000     | 0.8 $\mu$ M    | P    | 20 — 0.3 $\mu$ M          |
| HNHA          | HDAC               |                                     | Cayman        | 13295    | 0.08 $\mu$ M   | P    | 20 — 0.3 $\mu$ M          |
| PDGFR TKI III | PDGFR              | KIT                                 | EMD Millipore | 521232   | 0.23 $\mu$ M   | L    | 10 — 0.2 $\mu$ M          |
| PI3Ka Inh IV  | PI3K(PIK3CA/2A/2B) |                                     | EMD Millipore | 528111   | 0.03 $\mu$ M   | P    | 4 — 0.06 $\mu$ M          |
| Rapamycin     | mTOR               |                                     | Selleckchem   | 1039     | 1 pM           | L    | 0.1 $\mu$ M — 0.1 pM      |
| Rottlerin     | PKC/CaMKIII        | PKC isoforms                        | Tocris        | 1610     | 0.125 $\mu$ M  | L    | 5 — 0.08 $\mu$ M          |
| Ryuvidine     | CDK4/6             | CDK2                                | Tocris        | 2609     | 0.1 $\mu$ M    | L    | 2 — 0.03 $\mu$ M          |
| SL327         | MEK1/2             | JNK                                 | EMD Millipore | 444939   | 4 $\mu$ M      | P    | 5 — 0.08 $\mu$ M          |
| SRC Inh I     | SRC                | LCK                                 | EMD Millipore | 567805   | 2.4 $\mu$ M    | L    | 5 — 0.08 $\mu$ M          |
| Stattic       | STAT3              |                                     | EMD Millipore | 573099   | 0.075 $\mu$ M  | L    | 0.4 — 0.006 $\mu$ M       |
| SU11247       | MET                |                                     | EMD Millipore | 448101   | 0.5 $\mu$ M    | L    | 20 — 0.3 $\mu$ M          |

Table S2: **Dose-response measurements of single and paired drug perturbations using the Resazurin assay.** In each experiment (named by date and drug combination) seven drug concentrations were used (C1-C7, two fold dilution series). The drugs were administered individually at the doses indicated or in combinations with the doses corresponding to those used for the single drugs (for example 5  $\mu$ M AKT inhibitor and 2  $\mu$ M PI3K inhibitor for AK.PK.C5). The estimated effect on cell viability (the assay measures metabolic activity) was determined relative to control (DMSO treated). At least four biological replicates were performed for each condition and the standard deviations are indicated. The abbreviations of the drugs and their main targets are as follows; AG: IGF1R, AK: AKT, ER: ERK, GF: EGFR, HN: HDAC, PD: PDGFR, PI: PI3K, RT: PKC, RY: CDK4, SL: MEK, SR: SRC, ST: STAT3, SU: MET. Please see **table S1** for drug names.

| Experiment     | Condition | Drug Dose ( $\mu$ M) | Effect (rel. to DMSO) | STD   | Experiment     | Condition | Drug Dose ( $\mu$ M) | Effect (rel. to DMSO) | STD   |
|----------------|-----------|----------------------|-----------------------|-------|----------------|-----------|----------------------|-----------------------|-------|
| 20091112.AK.PI | AK.C1     | 0.3125               | 1.216                 | 0.12  | 20100202.AK.ER | AK.C1     | 0.3125               | 0.983                 | 0.036 |
| 20091112.AK.PI | AK.C2     | 0.625                | 0.995                 | 0.1   | 20100202.AK.ER | AK.C2     | 0.625                | 0.895                 | 0.056 |
| 20091112.AK.PI | AK.C3     | 1.25                 | 0.98                  | 0.097 | 20100202.AK.ER | AK.C3     | 1.25                 | 0.887                 | 0.081 |
| 20091112.AK.PI | AK.C4     | 2.5                  | 0.926                 | 0.037 | 20100202.AK.ER | AK.C4     | 2.5                  | 0.785                 | 0.072 |
| 20091112.AK.PI | AK.C5     | 5                    | 0.722                 | 0.043 | 20100202.AK.ER | AK.C5     | 5                    | 0.587                 | 0.034 |
| 20091112.AK.PI | AK.C6     | 10                   | 0.412                 | 0.018 | 20100202.AK.ER | AK.C6     | 10                   | 0.399                 | 0.04  |
| 20091112.AK.PI | AK.C7     | 20                   | 0.264                 | 0.022 | 20100202.AK.ER | AK.C7     | 20                   | 0.277                 | 0.034 |
| 20091112.AK.PI | AK.PI.C1  | AK.PI.C1             | 0.927                 | 0.051 | 20100202.AK.ER | AK.ER.C1  | AK.ER.C1             | 0.965                 | 0.042 |
| 20091112.AK.PI | AK.PI.C2  | AK.PI.C2             | 0.781                 | 0.039 | 20100202.AK.ER | AK.ER.C2  | AK.ER.C2             | 0.929                 | 0.081 |
| 20091112.AK.PI | AK.PI.C3  | AK.PI.C3             | 0.588                 | 0.025 | 20100202.AK.ER | AK.ER.C3  | AK.ER.C3             | 0.906                 | 0.058 |
| 20091112.AK.PI | AK.PI.C4  | AK.PI.C4             | 0.472                 | 0.028 | 20100202.AK.ER | AK.ER.C4  | AK.ER.C4             | 0.88                  | 0.062 |
| 20091112.AK.PI | AK.PI.C5  | AK.PI.C5             | 0.32                  | 0.027 | 20100202.AK.ER | AK.ER.C5  | AK.ER.C5             | 0.697                 | 0.053 |
| 20091112.AK.PI | AK.PI.C6  | AK.PI.C6             | 0.238                 | 0.012 | 20100202.AK.ER | AK.ER.C6  | AK.ER.C6             | 0.422                 | 0.066 |
| 20091112.AK.PI | AK.PI.C7  | AK.PI.C7             | 0.141                 | 0.009 | 20100202.AK.ER | AK.ER.C7  | AK.ER.C7             | 0.27                  | 0.048 |
| 20091112.AK.PI | PI.C1     | 0.125                | 1.023                 | 0.061 | 20100202.AK.ER | ER.C1     | 0.078125             | 1.01                  | 0.025 |
| 20091112.AK.PI | PI.C2     | 0.25                 | 0.788                 | 0.042 | 20100202.AK.ER | ER.C2     | 0.15625              | 1.053                 | 0.037 |
| 20091112.AK.PI | PI.C3     | 0.5                  | 0.636                 | 0.039 | 20100202.AK.ER | ER.C3     | 0.3125               | 1.026                 | 0.038 |
| 20091112.AK.PI | PI.C4     | 1                    | 0.433                 | 0.036 | 20100202.AK.ER | ER.C4     | 0.625                | 1.019                 | 0.048 |
| 20091112.AK.PI | PI.C5     | 2                    | 0.323                 | 0.017 | 20100202.AK.ER | ER.C5     | 1.25                 | 1.001                 | 0.062 |
| 20091112.AK.PI | PI.C6     | 4                    | 0.253                 | 0.015 | 20100202.AK.ER | ER.C6     | 2.5                  | 0.969                 | 0.069 |
| 20091112.AK.PI | PI.C7     | 8                    | 0.225                 | 0.02  | 20100202.AK.ER | ER.C7     | 5                    | 0.949                 | 0.114 |
| 20091112.AK.SU | AK.C1     | 0.3125               | 1.216                 | 0.12  | 20100202.AK.GF | AK.C1     | 0.3125               | 0.983                 | 0.036 |
| 20091112.AK.SU | AK.C2     | 0.625                | 0.995                 | 0.1   | 20100202.AK.GF | AK.C2     | 0.625                | 0.895                 | 0.056 |
| 20091112.AK.SU | AK.C3     | 1.25                 | 0.98                  | 0.097 | 20100202.AK.GF | AK.C3     | 1.25                 | 0.887                 | 0.081 |
| 20091112.AK.SU | AK.C4     | 2.5                  | 0.926                 | 0.037 | 20100202.AK.GF | AK.C4     | 2.5                  | 0.785                 | 0.072 |
| 20091112.AK.SU | AK.C5     | 5                    | 0.722                 | 0.043 | 20100202.AK.GF | AK.C5     | 5                    | 0.587                 | 0.034 |
| 20091112.AK.SU | AK.C6     | 10                   | 0.412                 | 0.018 | 20100202.AK.GF | AK.C6     | 10                   | 0.399                 | 0.04  |
| 20091112.AK.SU | AK.C7     | 20                   | 0.264                 | 0.022 | 20100202.AK.GF | AK.C7     | 20                   | 0.277                 | 0.034 |
| 20091112.AK.SU | AK.SU.C1  | AK.SU.C1             | 0.896                 | 0.036 | 20100202.AK.GF | AK.GFC1   | AK.GFC1              | 0.855                 | 0.039 |
| 20091112.AK.SU | AK.SU.C2  | AK.SU.C2             | 0.996                 | 0.048 | 20100202.AK.GF | AK.GFC2   | AK.GFC2              | 0.809                 | 0.062 |
| 20091112.AK.SU | AK.SU.C3  | AK.SU.C3             | 0.821                 | 0.062 | 20100202.AK.GF | AK.GFC3   | AK.GFC3              | 0.725                 | 0.057 |
| 20091112.AK.SU | AK.SU.C4  | AK.SU.C4             | 0.674                 | 0.035 | 20100202.AK.GF | AK.GFC4   | AK.GFC4              | 0.658                 | 0.023 |
| 20091112.AK.SU | AK.SU.C5  | AK.SU.C5             | 0.391                 | 0.03  | 20100202.AK.GF | AK.GFC5   | AK.GFC5              | 0.357                 | 0.013 |
| 20091112.AK.SU | AK.SU.C6  | AK.SU.C6             | 0.21                  | 0.016 | 20100202.AK.GF | AK.GFC6   | AK.GFC6              | 0.159                 | 0.008 |
| 20091112.AK.SU | AK.SU.C7  | AK.SU.C7             | 0.015                 | 0.001 | 20100202.AK.GF | AK.GFC7   | AK.GFC7              | 0.01                  | 0.001 |
| 20091112.AK.SU | SU.C1     | 0.3125               | 1.08                  | 0.138 | 20100202.AK.GF | GF.C1     | 0.3125               | 1.001                 | 0.04  |
| 20091112.AK.SU | SU.C2     | 0.625                | 1.061                 | 0.171 | 20100202.AK.GF | GF.C2     | 0.625                | 0.976                 | 0.063 |
| 20091112.AK.SU | SU.C3     | 1.25                 | 0.861                 | 0.097 | 20100202.AK.GF | GF.C3     | 1.25                 | 1.042                 | 0.113 |
| 20091112.AK.SU | SU.C4     | 2.5                  | 0.806                 | 0.038 | 20100202.AK.GF | GF.C4     | 2.5                  | 0.93                  | 0.111 |
| 20091112.AK.SU | SU.C5     | 5                    | 0.645                 | 0.044 | 20100202.AK.GF | GF.C5     | 5                    | 0.903                 | 0.116 |
| 20091112.AK.SU | SU.C6     | 10                   | 0.444                 | 0.03  | 20100202.AK.GF | GF.C6     | 10                   | 0.702                 | 0.084 |
| 20091112.AK.SU | SU.C7     | 20                   | 0.282                 | 0.02  | 20100202.AK.GF | GF.C7     | 20                   | 0.366                 | 0.058 |
| 20091112.PI.SU | PI.C1     | 0.125                | 1.023                 | 0.061 | 20100202.ER.GF | ER.C1     | 0.078125             | 1.01                  | 0.025 |
| 20091112.PI.SU | PI.C2     | 0.25                 | 0.788                 | 0.042 | 20100202.ER.GF | ER.C2     | 0.15625              | 1.053                 | 0.037 |
| 20091112.PI.SU | PI.C3     | 0.5                  | 0.636                 | 0.039 | 20100202.ER.GF | ER.C3     | 0.3125               | 1.026                 | 0.038 |
| 20091112.PI.SU | PI.C4     | 1                    | 0.433                 | 0.036 | 20100202.ER.GF | ER.C4     | 0.625                | 1.019                 | 0.048 |
| 20091112.PI.SU | PI.C5     | 2                    | 0.323                 | 0.017 | 20100202.ER.GF | ER.C5     | 1.25                 | 1.001                 | 0.062 |
| 20091112.PI.SU | PI.C6     | 4                    | 0.253                 | 0.015 | 20100202.ER.GF | ER.C6     | 2.5                  | 0.969                 | 0.069 |
| 20091112.PI.SU | PI.C7     | 8                    | 0.225                 | 0.02  | 20100202.ER.GF | ER.C7     | 5                    | 0.949                 | 0.114 |
| 20091112.PI.SU | PI.SU.C1  | PI.SU.C1             | 0.93                  | 0.038 | 20100202.ER.GF | ER.GFC1   | ER.GFC1              | 0.944                 | 0.039 |
| 20091112.PI.SU | PI.SU.C2  | PI.SU.C2             | 0.799                 | 0.067 | 20100202.ER.GF | ER.GFC2   | ER.GFC2              | 0.935                 | 0.036 |
| 20091112.PI.SU | PI.SU.C3  | PI.SU.C3             | 0.588                 | 0.05  | 20100202.ER.GF | ER.GFC3   | ER.GFC3              | 0.924                 | 0.043 |
| 20091112.PI.SU | PI.SU.C4  | PI.SU.C4             | 0.536                 | 0.067 | 20100202.ER.GF | ER.GFC4   | ER.GFC4              | 0.901                 | 0.033 |
| 20091112.PI.SU | PI.SU.C5  | PI.SU.C5             | 0.268                 | 0.031 | 20100202.ER.GF | ER.GFC5   | ER.GFC5              | 0.805                 | 0.037 |
| 20091112.PI.SU | PI.SU.C6  | PI.SU.C6             | 0.171                 | 0.029 | 20100202.ER.GF | ER.GFC6   | ER.GFC6              | 0.654                 | 0.056 |
| 20091112.PI.SU | PI.SU.C7  | PI.SU.C7             | 0.099                 | 0.007 | 20100202.ER.GF | ER.GFC7   | ER.GFC7              | 0.28                  | 0.01  |
| 20091112.PI.SU | SU.C1     | 0.3125               | 1.08                  | 0.138 | 20100202.ER.GF | GF.C1     | 0.3125               | 1.001                 | 0.04  |
| 20091112.PI.SU | SU.C2     | 0.625                | 1.061                 | 0.171 | 20100202.ER.GF | GF.C2     | 0.625                | 0.976                 | 0.063 |
| 20091112.PI.SU | SU.C3     | 1.25                 | 0.861                 | 0.097 | 20100202.ER.GF | GF.C3     | 1.25                 | 1.042                 | 0.113 |
| 20091112.PI.SU | SU.C4     | 2.5                  | 0.806                 | 0.038 | 20100202.ER.GF | GF.C4     | 2.5                  | 0.93                  | 0.111 |
| 20091112.PI.SU | SU.C5     | 5                    | 0.645                 | 0.044 | 20100202.ER.GF | GF.C5     | 5                    | 0.903                 | 0.116 |

Table S2 continued

| Experiment     | Condition | Drug Dose ( $\mu$ M) | Effect (rel. to DMSO) | STD   | Experiment     | Condition | Drug Dose ( $\mu$ M) | Effect (rel. to DMSO) | STD   |
|----------------|-----------|----------------------|-----------------------|-------|----------------|-----------|----------------------|-----------------------|-------|
| 20091112.PI.SU | SU.C6     | 10                   | 0.444                 | 0.03  | 20100202.ER.GF | GF.C6     | 10                   | 0.702                 | 0.084 |
| 20091112.PI.SU | SU.C7     | 20                   | 0.282                 | 0.02  | 20100202.ER.GF | GF.C7     | 20                   | 0.366                 | 0.058 |
| 20091116.GF.HN | GF.C1     | 0.625                | 1.171                 | 0.129 | 20100205.HN.ST | HN.C1     | 0.3125               | 0.992                 | 0.037 |
| 20091116.GF.HN | GF.C2     | 1.25                 | 1.131                 | 0.137 | 20100205.HN.ST | HN.C2     | 0.625                | 0.969                 | 0.053 |
| 20091116.GF.HN | GF.C3     | 2.5                  | 0.801                 | 0.038 | 20100205.HN.ST | HN.C3     | 1.25                 | 0.909                 | 0.037 |
| 20091116.GF.HN | GF.C4     | 5                    | 0.803                 | 0.073 | 20100205.HN.ST | HN.C4     | 2.5                  | 0.765                 | 0.038 |
| 20091116.GF.HN | GF.C5     | 10                   | 0.661                 | 0.076 | 20100205.HN.ST | HN.C5     | 5                    | 0.656                 | 0.024 |
| 20091116.GF.HN | GF.C6     | 20                   | 0.21                  | 0.019 | 20100205.HN.ST | HN.C6     | 10                   | 0.349                 | 0.025 |
| 20091116.GF.HN | GF.C7     | 40                   | -0.003                | 0.002 | 20100205.HN.ST | HN.C7     | 20                   | 0.098                 | 0.022 |
| 20091116.GF.HN | GF.HN.C1  | GF.HN.C1             | 1.042                 | 0.046 | 20100205.HN.ST | HN.ST.C1  | HN.ST.C1             | 0.924                 | 0.033 |
| 20091116.GF.HN | GF.HN.C2  | GF.HN.C2             | 0.983                 | 0.022 | 20100205.HN.ST | HN.ST.C2  | HN.ST.C2             | 0.926                 | 0.03  |
| 20091116.GF.HN | GF.HN.C3  | GF.HN.C3             | 0.965                 | 0.101 | 20100205.HN.ST | HN.ST.C3  | HN.ST.C3             | 0.833                 | 0.038 |
| 20091116.GF.HN | GF.HN.C4  | GF.HN.C4             | 0.8                   | 0.049 | 20100205.HN.ST | HN.ST.C4  | HN.ST.C4             | 0.495                 | 0.096 |
| 20091116.GF.HN | GF.HN.C5  | GF.HN.C5             | 0.575                 | 0.05  | 20100205.HN.ST | HN.ST.C5  | HN.ST.C5             | 0.201                 | 0.018 |
| 20091116.GF.HN | GF.HN.C6  | GF.HN.C6             | 0.251                 | 0.046 | 20100205.HN.ST | HN.ST.C6  | HN.ST.C6             | 0.024                 | 0.002 |
| 20091116.GF.HN | GF.HN.C7  | GF.HN.C7             | 0.003                 | 0.001 | 20100205.HN.ST | HN.ST.C7  | HN.ST.C7             | 0.013                 | 0.001 |
| 20091116.GF.HN | HN.C1     | 0.3125               | 0.995                 | 0.06  | 20100205.HN.ST | ST.C1     | 0.078125             | 1.05                  | 0.013 |
| 20091116.GF.HN | HN.C2     | 0.625                | 1.129                 | 0.149 | 20100205.HN.ST | ST.C2     | 0.15625              | 1.048                 | 0.024 |
| 20091116.GF.HN | HN.C3     | 1.25                 | 1.018                 | 0.066 | 20100205.HN.ST | ST.C3     | 0.3125               | 0.96                  | 0.023 |
| 20091116.GF.HN | HN.C4     | 2.5                  | 0.976                 | 0.07  | 20100205.HN.ST | ST.C4     | 0.625                | 0.629                 | 0.032 |
| 20091116.GF.HN | HN.C5     | 5                    | 1.074                 | 0.162 | 20100205.HN.ST | ST.C5     | 1.25                 | 0.333                 | 0.018 |
| 20091116.GF.HN | HN.C6     | 10                   | 0.69                  | 0.042 | 20100205.HN.ST | ST.C6     | 2.5                  | 0.039                 | 0.004 |
| 20091116.GF.HN | HN.C7     | 20                   | 0.27                  | 0.026 | 20100205.HN.ST | ST.C7     | 5                    | 0.009                 | 0.001 |
| 20091116.HN.RT | HN.C1     | 0.3125               | 0.995                 | 0.06  | 20100205.HN.SU | HN.C1     | 0.3125               | 0.992                 | 0.037 |
| 20091116.HN.RT | HN.C2     | 0.625                | 1.129                 | 0.149 | 20100205.HN.SU | HN.C2     | 0.625                | 0.969                 | 0.053 |
| 20091116.HN.RT | HN.C3     | 1.25                 | 1.018                 | 0.066 | 20100205.HN.SU | HN.C3     | 1.25                 | 0.909                 | 0.037 |
| 20091116.HN.RT | HN.C4     | 2.5                  | 0.976                 | 0.07  | 20100205.HN.SU | HN.C4     | 2.5                  | 0.765                 | 0.038 |
| 20091116.HN.RT | HN.C5     | 5                    | 1.074                 | 0.162 | 20100205.HN.SU | HN.C5     | 5                    | 0.656                 | 0.024 |
| 20091116.HN.RT | HN.C6     | 10                   | 0.69                  | 0.042 | 20100205.HN.SU | HN.C6     | 10                   | 0.349                 | 0.025 |
| 20091116.HN.RT | HN.C7     | 20                   | 0.27                  | 0.026 | 20100205.HN.SU | HN.C7     | 20                   | 0.098                 | 0.022 |
| 20091116.HN.RT | HN.RT.C1  | HN.RT.C1             | 0.89                  | 0.082 | 20100205.HN.SU | HN.SU.C1  | HN.SU.C1             | 0.968                 | 0.01  |
| 20091116.HN.RT | HN.RT.C2  | HN.RT.C2             | 0.999                 | 0.05  | 20100205.HN.SU | HN.SU.C2  | HN.SU.C2             | 1                     | 0.038 |
| 20091116.HN.RT | HN.RT.C3  | HN.RT.C3             | 0.808                 | 0.032 | 20100205.HN.SU | HN.SU.C3  | HN.SU.C3             | 0.919                 | 0.037 |
| 20091116.HN.RT | HN.RT.C4  | HN.RT.C4             | 0.773                 | 0.057 | 20100205.HN.SU | HN.SU.C4  | HN.SU.C4             | 0.713                 | 0.089 |
| 20091116.HN.RT | HN.RT.C5  | HN.RT.C5             | 0.528                 | 0.059 | 20100205.HN.SU | HN.SU.C5  | HN.SU.C5             | 0.411                 | 0.031 |
| 20091116.HN.RT | HN.RT.C6  | HN.RT.C6             | 0.249                 | 0.036 | 20100205.HN.SU | HN.SU.C6  | HN.SU.C6             | 0.209                 | 0.015 |
| 20091116.HN.RT | HN.RT.C7  | HN.RT.C7             | 0.027                 | 0.005 | 20100205.HN.SU | HN.SU.C7  | HN.SU.C7             | 0.026                 | 0.014 |
| 20091116.HN.RT | RT.C1     | 0.0625               | 1.01                  | 0.076 | 20100205.HN.SU | SU.C1     | 0.3125               | 1.086                 | 0.089 |
| 20091116.HN.RT | RT.C2     | 0.125                | 0.786                 | 0.045 | 20100205.HN.SU | SU.C2     | 0.625                | 0.991                 | 0.084 |
| 20091116.HN.RT | RT.C3     | 0.25                 | 0.766                 | 0.042 | 20100205.HN.SU | SU.C3     | 1.25                 | 0.887                 | 0.096 |
| 20091116.HN.RT | RT.C4     | 0.5                  | 0.672                 | 0.062 | 20100205.HN.SU | SU.C4     | 2.5                  | 0.835                 | 0.057 |
| 20091116.HN.RT | RT.C5     | 1                    | 0.494                 | 0.044 | 20100205.HN.SU | SU.C5     | 5                    | 0.607                 | 0.059 |
| 20091116.HN.RT | RT.C6     | 2                    | 0.209                 | 0.069 | 20100205.HN.SU | SU.C6     | 10                   | 0.492                 | 0.087 |
| 20091116.HN.RT | RT.C7     | 4                    | 0.106                 | 0.009 | 20100205.HN.SU | SU.C7     | 20                   | 0.313                 | 0.043 |
| 20091209.ER.SL | ER.C1     | 0.3125               | 1.022                 | 0.046 | 20100205.ST.SU | ST.C1     | 0.078125             | 1.05                  | 0.013 |
| 20091209.ER.SL | ER.C2     | 0.625                | 1.002                 | 0.067 | 20100205.ST.SU | ST.C2     | 0.15625              | 1.048                 | 0.024 |
| 20091209.ER.SL | ER.C3     | 1.25                 | 1.004                 | 0.04  | 20100205.ST.SU | ST.C3     | 0.3125               | 0.96                  | 0.023 |
| 20091209.ER.SL | ER.C4     | 2.5                  | 0.967                 | 0.038 | 20100205.ST.SU | ST.C4     | 0.625                | 0.629                 | 0.032 |
| 20091209.ER.SL | ER.C5     | 5                    | 0.973                 | 0.027 | 20100205.ST.SU | ST.C5     | 1.25                 | 0.333                 | 0.018 |
| 20091209.ER.SL | ER.C6     | 10                   | 1.004                 | 0.031 | 20100205.ST.SU | ST.C6     | 2.5                  | 0.039                 | 0.004 |
| 20091209.ER.SL | ER.C7     | 20                   | 0.829                 | 0.045 | 20100205.ST.SU | ST.C7     | 5                    | 0.009                 | 0.001 |
| 20091209.ER.SL | ER.SL.C1  | ER.SL.C1             | 0.898                 | 0.09  | 20100205.ST.SU | ST.SU.C1  | ST.SU.C1             | 1.044                 | 0.035 |
| 20091209.ER.SL | ER.SL.C2  | ER.SL.C2             | 0.887                 | 0.088 | 20100205.ST.SU | ST.SU.C2  | ST.SU.C2             | 1.046                 | 0.043 |
| 20091209.ER.SL | ER.SL.C3  | ER.SL.C3             | 0.917                 | 0.036 | 20100205.ST.SU | ST.SU.C3  | ST.SU.C3             | 0.939                 | 0.042 |
| 20091209.ER.SL | ER.SL.C4  | ER.SL.C4             | 1.043                 | 0.044 | 20100205.ST.SU | ST.SU.C4  | ST.SU.C4             | 0.646                 | 0.035 |
| 20091209.ER.SL | ER.SL.C5  | ER.SL.C5             | 0.984                 | 0.052 | 20100205.ST.SU | ST.SU.C5  | ST.SU.C5             | 0.271                 | 0.013 |
| 20091209.ER.SL | ER.SL.C6  | ER.SL.C6             | 0.888                 | 0.047 | 20100205.ST.SU | ST.SU.C6  | ST.SU.C6             | 0.026                 | 0.002 |
| 20091209.ER.SL | ER.SL.C7  | ER.SL.C7             | 0.83                  | 0.052 | 20100205.ST.SU | ST.SU.C7  | ST.SU.C7             | 0.011                 | 0.002 |
| 20091209.ER.SL | SL.C1     | 0.3125               | 1.311                 | 0.091 | 20100205.ST.SU | SU.C1     | 0.3125               | 1.086                 | 0.089 |
| 20091209.ER.SL | SL.C2     | 0.625                | 1.133                 | 0.216 | 20100205.ST.SU | SU.C2     | 0.625                | 0.991                 | 0.084 |
| 20091209.ER.SL | SL.C3     | 1.25                 | 1.03                  | 0.152 | 20100205.ST.SU | SU.C3     | 1.25                 | 0.887                 | 0.096 |
| 20091209.ER.SL | SL.C4     | 2.5                  | 0.898                 | 0.068 | 20100205.ST.SU | SU.C4     | 2.5                  | 0.835                 | 0.057 |
| 20091209.ER.SL | SL.C5     | 5                    | 0.904                 | 0.045 | 20100205.ST.SU | SU.C5     | 5                    | 0.607                 | 0.059 |
| 20091209.ER.SL | SL.C6     | 10                   | 0.878                 | 0.053 | 20100205.ST.SU | SU.C6     | 10                   | 0.492                 | 0.087 |
| 20091209.ER.SL | SL.C7     | 20                   | 0.9                   | 0.035 | 20100205.ST.SU | SU.C7     | 20                   | 0.313                 | 0.043 |
| 20091209.ER.SU | ER.C1     | 0.3125               | 1.022                 | 0.046 | 20100208.AG.AK | AG.AK.C1  | AG.AK.C1             | 0.91                  | 0.044 |
| 20091209.ER.SU | ER.C2     | 0.625                | 1.002                 | 0.067 | 20100208.AG.AK | AG.AK.C2  | AG.AK.C2             | 0.897                 | 0.043 |
| 20091209.ER.SU | ER.C3     | 1.25                 | 1.004                 | 0.04  | 20100208.AG.AK | AG.AK.C3  | AG.AK.C3             | 0.831                 | 0.028 |
| 20091209.ER.SU | ER.C4     | 2.5                  | 0.967                 | 0.038 | 20100208.AG.AK | AG.AK.C4  | AG.AK.C4             | 0.811                 | 0.028 |

Table S2 continued

| Experiment     | Condition | Drug Dose<br>( $\mu$ M) | Effect<br>(rel. to DMSO) | STD   | Experiment     | Condition | Drug Dose<br>( $\mu$ M) | Effect<br>(rel. to DMSO) | STD   |
|----------------|-----------|-------------------------|--------------------------|-------|----------------|-----------|-------------------------|--------------------------|-------|
| 20091209.ER.SU | ER.C5     | 5                       | 0.973                    | 0.027 | 20100208.AG.AK | AG.AK.C5  | AG.AK.C5                | 0.58                     | 0.02  |
| 20091209.ER.SU | ER.C6     | 10                      | 1.004                    | 0.031 | 20100208.AG.AK | AG.AK.C6  | AG.AK.C6                | 0.349                    | 0.018 |
| 20091209.ER.SU | ER.C7     | 20                      | 0.829                    | 0.045 | 20100208.AG.AK | AG.AK.C7  | AG.AK.C7                | 0.221                    | 0.005 |
| 20091209.ER.SU | ER.SU.C1  | ER.SU.C1                | 0.829                    | 0.123 | 20100208.AG.AK | AG.C1     | 0.078125                | 1.059                    | 0.083 |
| 20091209.ER.SU | ER.SU.C2  | ER.SU.C2                | 0.837                    | 0.081 | 20100208.AG.AK | AG.C2     | 0.15625                 | 0.96                     | 0.041 |
| 20091209.ER.SU | ER.SU.C3  | ER.SU.C3                | 0.739                    | 0.078 | 20100208.AG.AK | AG.C3     | 0.3125                  | 0.952                    | 0.051 |
| 20091209.ER.SU | ER.SU.C4  | ER.SU.C4                | 0.625                    | 0.068 | 20100208.AG.AK | AG.C4     | 0.625                   | 0.918                    | 0.038 |
| 20091209.ER.SU | ER.SU.C5  | ER.SU.C5                | 0.532                    | 0.045 | 20100208.AG.AK | AG.C5     | 1.25                    | 0.795                    | 0.05  |
| 20091209.ER.SU | ER.SU.C6  | ER.SU.C6                | 0.385                    | 0.022 | 20100208.AG.AK | AG.C6     | 2.5                     | 0.767                    | 0.035 |
| 20091209.ER.SU | ER.SU.C7  | ER.SU.C7                | 0.279                    | 0.038 | 20100208.AG.AK | AG.C7     | 5                       | 0.797                    | 0.065 |
| 20091209.ER.SU | SU.C1     | 0.3125                  | 0.978                    | 0.145 | 20100208.AG.AK | AK.C1     | 0.3125                  | 0.984                    | 0.054 |
| 20091209.ER.SU | SU.C2     | 0.625                   | 0.797                    | 0.087 | 20100208.AG.AK | AK.C2     | 0.625                   | 0.909                    | 0.032 |
| 20091209.ER.SU | SU.C3     | 1.25                    | 0.909                    | 0.103 | 20100208.AG.AK | AK.C3     | 1.25                    | 0.934                    | 0.047 |
| 20091209.ER.SU | SU.C4     | 2.5                     | 0.73                     | 0.057 | 20100208.AG.AK | AK.C4     | 2.5                     | 0.862                    | 0.048 |
| 20091209.ER.SU | SU.C5     | 5                       | 0.553                    | 0.043 | 20100208.AG.AK | AK.C5     | 5                       | 0.647                    | 0.059 |
| 20091209.ER.SU | SU.C6     | 10                      | 0.44                     | 0.029 | 20100208.AG.AK | AK.C6     | 10                      | 0.343                    | 0.023 |
| 20091209.ER.SU | SU.C7     | 20                      | 0.293                    | 0.032 | 20100208.AG.AK | AK.C7     | 20                      | 0.224                    | 0.009 |
| 20091209.SL.SU | SL.C1     | 0.3125                  | 1.311                    | 0.091 | 20100208.AG.PD | AG.C1     | 0.078125                | 1.059                    | 0.083 |
| 20091209.SL.SU | SL.C2     | 0.625                   | 1.133                    | 0.216 | 20100208.AG.PD | AG.C2     | 0.15625                 | 0.96                     | 0.041 |
| 20091209.SL.SU | SL.C3     | 1.25                    | 1.03                     | 0.152 | 20100208.AG.PD | AG.C3     | 0.3125                  | 0.952                    | 0.051 |
| 20091209.SL.SU | SL.C4     | 2.5                     | 0.898                    | 0.068 | 20100208.AG.PD | AG.C4     | 0.625                   | 0.918                    | 0.038 |
| 20091209.SL.SU | SL.C5     | 5                       | 0.904                    | 0.045 | 20100208.AG.PD | AG.C5     | 1.25                    | 0.795                    | 0.05  |
| 20091209.SL.SU | SL.C6     | 10                      | 0.878                    | 0.053 | 20100208.AG.PD | AG.C6     | 2.5                     | 0.767                    | 0.035 |
| 20091209.SL.SU | SL.C7     | 20                      | 0.9                      | 0.035 | 20100208.AG.PD | AG.C7     | 5                       | 0.797                    | 0.065 |
| 20091209.SL.SU | SL.SU.C1  | SL.SU.C1                | 0.828                    | 0.082 | 20100208.AG.PD | AG.PD.C1  | AG.PD.C1                | 1.008                    | 0.04  |
| 20091209.SL.SU | SL.SU.C2  | SL.SU.C2                | 0.845                    | 0.052 | 20100208.AG.PD | AG.PD.C2  | AG.PD.C2                | 0.94                     | 0.057 |
| 20091209.SL.SU | SL.SU.C3  | SL.SU.C3                | 0.771                    | 0.08  | 20100208.AG.PD | AG.PD.C3  | AG.PD.C3                | 0.912                    | 0.064 |
| 20091209.SL.SU | SL.SU.C4  | SL.SU.C4                | 0.674                    | 0.046 | 20100208.AG.PD | AG.PD.C4  | AG.PD.C4                | 0.757                    | 0.085 |
| 20091209.SL.SU | SL.SU.C5  | SL.SU.C5                | 0.65                     | 0.09  | 20100208.AG.PD | AG.PD.C5  | AG.PD.C5                | 0.569                    | 0.033 |
| 20091209.SL.SU | SL.SU.C6  | SL.SU.C6                | 0.426                    | 0.054 | 20100208.AG.PD | AG.PD.C6  | AG.PD.C6                | 0.449                    | 0.05  |
| 20091209.SL.SU | SL.SU.C7  | SL.SU.C7                | 0.321                    | 0.384 | 20100208.AG.PD | AG.PD.C7  | AG.PD.C7                | 0.303                    | 0.02  |
| 20091209.SL.SU | SU.C1     | 0.3125                  | 0.978                    | 0.145 | 20100208.AG.PD | PDC1      | 0.15625                 | 0.991                    | 0.02  |
| 20091209.SL.SU | SU.C2     | 0.625                   | 0.797                    | 0.087 | 20100208.AG.PD | PDC2      | 0.3125                  | 0.954                    | 0.048 |
| 20091209.SL.SU | SU.C3     | 1.25                    | 0.909                    | 0.103 | 20100208.AG.PD | PDC3      | 0.625                   | 0.846                    | 0.04  |
| 20091209.SL.SU | SU.C4     | 2.5                     | 0.73                     | 0.057 | 20100208.AG.PD | PDC4      | 1.25                    | 0.83                     | 0.038 |
| 20091209.SL.SU | SU.C5     | 5                       | 0.553                    | 0.043 | 20100208.AG.PD | PDC5      | 2.5                     | 0.641                    | 0.03  |
| 20091209.SL.SU | SU.C6     | 10                      | 0.44                     | 0.029 | 20100208.AG.PD | PDC6      | 5                       | 0.402                    | 0.015 |
| 20091209.SL.SU | SU.C7     | 20                      | 0.293                    | 0.032 | 20100208.AG.PD | PDC7      | 10                      | 0.26                     | 0.042 |
| 20091211.AG.RT | AG.C1     | 0.3125                  | 1.076                    | 0.051 | 20100208.AG.SL | AG.C1     | 0.078125                | 1.059                    | 0.083 |
| 20091211.AG.RT | AG.C2     | 0.625                   | 0.964                    | 0.076 | 20100208.AG.SL | AG.C2     | 0.15625                 | 0.96                     | 0.041 |
| 20091211.AG.RT | AG.C3     | 1.25                    | 0.925                    | 0.085 | 20100208.AG.SL | AG.C3     | 0.3125                  | 0.952                    | 0.051 |
| 20091211.AG.RT | AG.C4     | 2.5                     | 0.813                    | 0.044 | 20100208.AG.SL | AG.C4     | 0.625                   | 0.918                    | 0.038 |
| 20091211.AG.RT | AG.C5     | 5                       | 0.842                    | 0.058 | 20100208.AG.SL | AG.C5     | 1.25                    | 0.795                    | 0.05  |
| 20091211.AG.RT | AG.C6     | 10                      | 0.8                      | 0.035 | 20100208.AG.SL | AG.C6     | 2.5                     | 0.767                    | 0.035 |
| 20091211.AG.RT | AG.C7     | 20                      | 0.667                    | 0.061 | 20100208.AG.SL | AG.C7     | 5                       | 0.797                    | 0.065 |
| 20091211.AG.RT | AG.RT.C1  | AG.RT.C1                | 0.957                    | 0.085 | 20100208.AG.SL | AG.SL.C1  | AG.SL.C1                | 1.145                    | 0.086 |
| 20091211.AG.RT | AG.RT.C2  | AG.RT.C2                | 0.941                    | 0.059 | 20100208.AG.SL | AG.SL.C2  | AG.SL.C2                | 1.158                    | 0.098 |
| 20091211.AG.RT | AG.RT.C3  | AG.RT.C3                | 0.886                    | 0.061 | 20100208.AG.SL | AG.SL.C3  | AG.SL.C3                | 0.969                    | 0.075 |
| 20091211.AG.RT | AG.RT.C4  | AG.RT.C4                | 0.616                    | 0.056 | 20100208.AG.SL | AG.SL.C4  | AG.SL.C4                | 0.807                    | 0.121 |
| 20091211.AG.RT | AG.RT.C5  | AG.RT.C5                | 0.518                    | 0.038 | 20100208.AG.SL | AG.SL.C5  | AG.SL.C5                | 0.744                    | 0.069 |
| 20091211.AG.RT | AG.RT.C6  | AG.RT.C6                | 0.177                    | 0.011 | 20100208.AG.SL | AG.SL.C6  | AG.SL.C6                | 0.633                    | 0.062 |
| 20091211.AG.RT | AG.RT.C7  | AG.RT.C7                | 0.104                    | 0.009 | 20100208.AG.SL | AG.SL.C7  | AG.SL.C7                | 0.601                    | 0.052 |
| 20091211.AG.RT | RT.C1     | 0.0625                  | 0.985                    | 0.063 | 20100208.AG.SL | SL.C1     | 0.078125                | 1.193                    | 0.034 |
| 20091211.AG.RT | RT.C2     | 0.125                   | 0.919                    | 0.048 | 20100208.AG.SL | SL.C2     | 0.15625                 | 1.05                     | 0.028 |
| 20091211.AG.RT | RT.C3     | 0.25                    | 0.842                    | 0.038 | 20100208.AG.SL | SL.C3     | 0.3125                  | 1.117                    | 0.047 |
| 20091211.AG.RT | RT.C4     | 0.5                     | 0.745                    | 0.054 | 20100208.AG.SL | SL.C4     | 0.625                   | 1.019                    | 0.027 |
| 20091211.AG.RT | RT.C5     | 1                       | 0.687                    | 0.034 | 20100208.AG.SL | SL.C5     | 1.25                    | 0.904                    | 0.037 |
| 20091211.AG.RT | RT.C6     | 2                       | 0.198                    | 0.022 | 20100208.AG.SL | SL.C6     | 2.5                     | 0.807                    | 0.075 |
| 20091211.AG.RT | RT.C7     | 4                       | 0.138                    | 0.01  | 20100208.AG.SL | SL.C7     | 5                       | 0.647                    | 0.036 |
| 20091211.AG.RY | AG.C1     | 0.3125                  | 1.076                    | 0.051 | 20100208.AK.PD | AK.C1     | 0.3125                  | 0.984                    | 0.054 |
| 20091211.AG.RY | AG.C2     | 0.625                   | 0.964                    | 0.076 | 20100208.AK.PD | AK.C2     | 0.625                   | 0.909                    | 0.032 |
| 20091211.AG.RY | AG.C3     | 1.25                    | 0.925                    | 0.085 | 20100208.AK.PD | AK.C3     | 1.25                    | 0.934                    | 0.047 |
| 20091211.AG.RY | AG.C4     | 2.5                     | 0.813                    | 0.044 | 20100208.AK.PD | AK.C4     | 2.5                     | 0.862                    | 0.048 |
| 20091211.AG.RY | AG.C5     | 5                       | 0.842                    | 0.058 | 20100208.AK.PD | AK.C5     | 5                       | 0.647                    | 0.059 |
| 20091211.AG.RY | AG.C6     | 10                      | 0.8                      | 0.035 | 20100208.AK.PD | AK.C6     | 10                      | 0.343                    | 0.023 |
| 20091211.AG.RY | AG.C7     | 20                      | 0.667                    | 0.061 | 20100208.AK.PD | AK.C7     | 20                      | 0.224                    | 0.009 |
| 20091211.AG.RY | AG.RY.C1  | AG.RY.C1                | 1.15                     | 0.039 | 20100208.AK.PD | AK.PD.C1  | AK.PD.C1                | 0.881                    | 0.021 |
| 20091211.AG.RY | AG.RY.C2  | AG.RY.C2                | 1.067                    | 0.048 | 20100208.AK.PD | AK.PD.C2  | AK.PD.C2                | 0.817                    | 0.071 |
| 20091211.AG.RY | AG.RY.C3  | AG.RY.C3                | 1.07                     | 0.03  | 20100208.AK.PD | AK.PD.C3  | AK.PD.C3                | 0.733                    | 0.09  |

Table S2 continued

| Experiment     | Condition | Drug Dose ( $\mu$ M) | Effect (rel. to DMSO) | STD   | Experiment     | Condition | Drug Dose ( $\mu$ M) | Effect (rel. to DMSO) | STD   |
|----------------|-----------|----------------------|-----------------------|-------|----------------|-----------|----------------------|-----------------------|-------|
| 20091211.AG.RY | AG.RY.C4  | AG.RY.C4             | 1.045                 | 0.048 | 20100208.AK.PD | AK.PD.C4  | AK.PD.C4             | 0.563                 | 0.045 |
| 20091211.AG.RY | AG.RY.C5  | AG.RY.C5             | 0.923                 | 0.02  | 20100208.AK.PD | AK.PD.C5  | AK.PD.C5             | 0.438                 | 0.055 |
| 20091211.AG.RY | AG.RY.C6  | AG.RY.C6             | 0.387                 | 0.031 | 20100208.AK.PD | AK.PD.C6  | AK.PD.C6             | 0.242                 | 0.022 |
| 20091211.AG.RY | AG.RY.C7  | AG.RY.C7             | 0.037                 | 0.002 | 20100208.AK.PD | AK.PD.C7  | AK.PD.C7             | 0.157                 | 0.012 |
| 20091211.AG.RY | RY.C1     | 0.03125              | 1.098                 | 0.035 | 20100208.AK.PD | PD.C1     | 0.15625              | 0.991                 | 0.02  |
| 20091211.AG.RY | RY.C2     | 0.0625               | 0.989                 | 0.09  | 20100208.AK.PD | PD.C2     | 0.3125               | 0.954                 | 0.048 |
| 20091211.AG.RY | RY.C3     | 0.125                | 0.992                 | 0.05  | 20100208.AK.PD | PD.C3     | 0.625                | 0.846                 | 0.04  |
| 20091211.AG.RY | RY.C4     | 0.25                 | 1.036                 | 0.015 | 20100208.AK.PD | PD.C4     | 1.25                 | 0.83                  | 0.038 |
| 20091211.AG.RY | RY.C5     | 0.5                  | 1.003                 | 0.043 | 20100208.AK.PD | PD.C5     | 2.5                  | 0.641                 | 0.03  |
| 20091211.AG.RY | RY.C6     | 1                    | 0.724                 | 0.027 | 20100208.AK.PD | PD.C6     | 5                    | 0.402                 | 0.015 |
| 20091211.AG.RY | RY.C7     | 2                    | 0.089                 | 0.031 | 20100208.AK.PD | PD.C7     | 10                   | 0.26                  | 0.042 |
| 20091211.AG.ST | AG.C1     | 0.3125               | 1.076                 | 0.051 | 20100208.AK.SL | AK.C1     | 0.3125               | 0.984                 | 0.054 |
| 20091211.AG.ST | AG.C2     | 0.625                | 0.964                 | 0.076 | 20100208.AK.SL | AK.C2     | 0.625                | 0.909                 | 0.032 |
| 20091211.AG.ST | AG.C3     | 1.25                 | 0.925                 | 0.085 | 20100208.AK.SL | AK.C3     | 1.25                 | 0.934                 | 0.047 |
| 20091211.AG.ST | AG.C4     | 2.5                  | 0.813                 | 0.044 | 20100208.AK.SL | AK.C4     | 2.5                  | 0.862                 | 0.048 |
| 20091211.AG.ST | AG.C5     | 5                    | 0.842                 | 0.058 | 20100208.AK.SL | AK.C5     | 5                    | 0.647                 | 0.059 |
| 20091211.AG.ST | AG.C6     | 10                   | 0.8                   | 0.035 | 20100208.AK.SL | AK.C6     | 10                   | 0.343                 | 0.023 |
| 20091211.AG.ST | AG.C7     | 20                   | 0.667                 | 0.061 | 20100208.AK.SL | AK.C7     | 20                   | 0.224                 | 0.009 |
| 20091211.AG.ST | AG.ST.C1  | AG.ST.C1             | 0.703                 | 0.024 | 20100208.AK.SL | AK.SL.C1  | AK.SL.C1             | 0.969                 | 0.036 |
| 20091211.AG.ST | AG.ST.C2  | AG.ST.C2             | 0.923                 | 0.022 | 20100208.AK.SL | AK.SL.C2  | AK.SL.C2             | 0.879                 | 0.039 |
| 20091211.AG.ST | AG.ST.C3  | AG.ST.C3             | 0.868                 | 0.044 | 20100208.AK.SL | AK.SL.C3  | AK.SL.C3             | 0.857                 | 0.026 |
| 20091211.AG.ST | AG.ST.C4  | AG.ST.C4             | 0.848                 | 0.038 | 20100208.AK.SL | AK.SL.C4  | AK.SL.C4             | 0.673                 | 0.058 |
| 20091211.AG.ST | AG.ST.C5  | AG.ST.C5             | 0.82                  | 0.039 | 20100208.AK.SL | AK.SL.C5  | AK.SL.C5             | 0.554                 | 0.046 |
| 20091211.AG.ST | AG.ST.C6  | AG.ST.C6             | 0.654                 | 0.1   | 20100208.AK.SL | AK.SL.C6  | AK.SL.C6             | 0.331                 | 0.029 |
| 20091211.AG.ST | AG.ST.C7  | AG.ST.C7             | 0.285                 | 0.056 | 20100208.AK.SL | AK.SL.C7  | AK.SL.C7             | 0.214                 | 0.017 |
| 20091211.AG.ST | ST.C1     | 0.00625              | 1.145                 | 0.102 | 20100208.AK.SL | SL.C1     | 0.078125             | 1.193                 | 0.034 |
| 20091211.AG.ST | ST.C2     | 0.0125               | 1.107                 | 0.018 | 20100208.AK.SL | SL.C2     | 0.15625              | 1.05                  | 0.028 |
| 20091211.AG.ST | ST.C3     | 0.025                | 1.089                 | 0.052 | 20100208.AK.SL | SL.C3     | 0.3125               | 1.117                 | 0.047 |
| 20091211.AG.ST | ST.C4     | 0.05                 | 1.053                 | 0.077 | 20100208.AK.SL | SL.C4     | 0.625                | 1.019                 | 0.027 |
| 20091211.AG.ST | ST.C5     | 0.1                  | 1.114                 | 0.052 | 20100208.AK.SL | SL.C5     | 1.25                 | 0.904                 | 0.037 |
| 20091211.AG.ST | ST.C6     | 0.2                  | 1.072                 | 0.049 | 20100208.AK.SL | SL.C6     | 2.5                  | 0.807                 | 0.075 |
| 20091211.AG.ST | ST.C7     | 0.4                  | 0.738                 | 0.044 | 20100208.AK.SL | SL.C7     | 5                    | 0.647                 | 0.036 |
| 20091211.RT.RY | RT.C1     | 0.0625               | 0.985                 | 0.063 | 20100208.AK.SR | AK.C1     | 0.3125               | 0.984                 | 0.054 |
| 20091211.RT.RY | RT.C2     | 0.125                | 0.919                 | 0.048 | 20100208.AK.SR | AK.C2     | 0.625                | 0.909                 | 0.032 |
| 20091211.RT.RY | RT.C3     | 0.25                 | 0.842                 | 0.038 | 20100208.AK.SR | AK.C3     | 1.25                 | 0.934                 | 0.047 |
| 20091211.RT.RY | RT.C4     | 0.5                  | 0.745                 | 0.054 | 20100208.AK.SR | AK.C4     | 2.5                  | 0.862                 | 0.048 |
| 20091211.RT.RY | RT.C5     | 1                    | 0.687                 | 0.034 | 20100208.AK.SR | AK.C5     | 5                    | 0.647                 | 0.059 |
| 20091211.RT.RY | RT.C6     | 2                    | 0.198                 | 0.022 | 20100208.AK.SR | AK.C6     | 10                   | 0.343                 | 0.023 |
| 20091211.RT.RY | RT.C7     | 4                    | 0.138                 | 0.01  | 20100208.AK.SR | AK.C7     | 20                   | 0.224                 | 0.009 |
| 20091211.RT.RY | RT.RY.C1  | RT.RY.C1             | 1.094                 | 0.055 | 20100208.AK.SR | AK.SR.C1  | AK.SR.C1             | 1.058                 | 0.03  |
| 20091211.RT.RY | RT.RY.C2  | RT.RY.C2             | 1.097                 | 0.034 | 20100208.AK.SR | AK.SR.C2  | AK.SR.C2             | 1.031                 | 0.034 |
| 20091211.RT.RY | RT.RY.C3  | RT.RY.C3             | 1.062                 | 0.033 | 20100208.AK.SR | AK.SR.C3  | AK.SR.C3             | 0.984                 | 0.041 |
| 20091211.RT.RY | RT.RY.C4  | RT.RY.C4             | 1.207                 | 0.028 | 20100208.AK.SR | AK.SR.C4  | AK.SR.C4             | 0.91                  | 0.064 |
| 20091211.RT.RY | RT.RY.C5  | RT.RY.C5             | 0.998                 | 0.068 | 20100208.AK.SR | AK.SR.C5  | AK.SR.C5             | 0.656                 | 0.044 |
| 20091211.RT.RY | RT.RY.C6  | RT.RY.C6             | 0.155                 | 0.037 | 20100208.AK.SR | AK.SR.C6  | AK.SR.C6             | 0.378                 | 0.023 |
| 20091211.RT.RY | RT.RY.C7  | RT.RY.C7             | 0.027                 | 0.004 | 20100208.AK.SR | AK.SR.C7  | AK.SR.C7             | 0.162                 | 0.015 |
| 20091211.RT.RY | RY.C1     | 0.03125              | 1.098                 | 0.035 | 20100208.AK.SR | SR.C1     | 0.078125             | 1.099                 | 0.036 |
| 20091211.RT.RY | RY.C2     | 0.0625               | 0.989                 | 0.09  | 20100208.AK.SR | SR.C2     | 0.15625              | 1.106                 | 0.037 |
| 20091211.RT.RY | RY.C3     | 0.125                | 0.992                 | 0.05  | 20100208.AK.SR | SR.C3     | 0.3125               | 0.96                  | 0.099 |
| 20091211.RT.RY | RY.C4     | 0.25                 | 1.036                 | 0.015 | 20100208.AK.SR | SR.C4     | 0.625                | 1.047                 | 0.077 |
| 20091211.RT.RY | RY.C5     | 0.5                  | 1.003                 | 0.043 | 20100208.AK.SR | SR.C5     | 1.25                 | 0.981                 | 0.082 |
| 20091211.RT.RY | RY.C6     | 1                    | 0.724                 | 0.027 | 20100208.AK.SR | SR.C6     | 2.5                  | 1.035                 | 0.055 |
| 20091211.RT.RY | RY.C7     | 2                    | 0.089                 | 0.031 | 20100208.AK.SR | SR.C7     | 5                    | 0.981                 | 0.094 |
| 20091211.RT.ST | RT.C1     | 0.0625               | 0.985                 | 0.063 | 20100208.PD.SL | PD.C1     | 0.15625              | 0.991                 | 0.02  |
| 20091211.RT.ST | RT.C2     | 0.125                | 0.919                 | 0.048 | 20100208.PD.SL | PD.C2     | 0.3125               | 0.954                 | 0.048 |
| 20091211.RT.ST | RT.C3     | 0.25                 | 0.842                 | 0.038 | 20100208.PD.SL | PD.C3     | 0.625                | 0.846                 | 0.04  |
| 20091211.RT.ST | RT.C4     | 0.5                  | 0.745                 | 0.054 | 20100208.PD.SL | PD.C4     | 1.25                 | 0.83                  | 0.038 |
| 20091211.RT.ST | RT.C5     | 1                    | 0.687                 | 0.034 | 20100208.PD.SL | PD.C5     | 2.5                  | 0.641                 | 0.03  |
| 20091211.RT.ST | RT.C6     | 2                    | 0.198                 | 0.022 | 20100208.PD.SL | PD.C6     | 5                    | 0.402                 | 0.015 |
| 20091211.RT.ST | RT.C7     | 4                    | 0.138                 | 0.01  | 20100208.PD.SL | PD.C7     | 10                   | 0.26                  | 0.042 |
| 20091211.RT.ST | RT.ST.C1  | RT.ST.C1             | 1.044                 | 0.034 | 20100208.PD.SL | PD.SL.C1  | PD.SL.C1             | 0.942                 | 0.05  |
| 20091211.RT.ST | RT.ST.C2  | RT.ST.C2             | 1.009                 | 0.04  | 20100208.PD.SL | PD.SL.C2  | PD.SL.C2             | 0.926                 | 0.044 |
| 20091211.RT.ST | RT.ST.C3  | RT.ST.C3             | 0.974                 | 0.06  | 20100208.PD.SL | PD.SL.C3  | PD.SL.C3             | 0.812                 | 0.031 |
| 20091211.RT.ST | RT.ST.C4  | RT.ST.C4             | 0.915                 | 0.044 | 20100208.PD.SL | PD.SL.C4  | PD.SL.C4             | 0.674                 | 0.032 |
| 20091211.RT.ST | RT.ST.C5  | RT.ST.C5             | 0.719                 | 0.029 | 20100208.PD.SL | PD.SL.C5  | PD.SL.C5             | 0.519                 | 0.031 |
| 20091211.RT.ST | RT.ST.C6  | RT.ST.C6             | 0.205                 | 0.018 | 20100208.PD.SL | PD.SL.C6  | PD.SL.C6             | 0.345                 | 0.03  |
| 20091211.RT.ST | RT.ST.C7  | RT.ST.C7             | 0.145                 | 0.014 | 20100208.PD.SL | PD.SL.C7  | PD.SL.C7             | 0.206                 | 0.012 |
| 20091211.RT.ST | ST.C1     | 0.00625              | 1.145                 | 0.102 | 20100208.PD.SL | SL.C1     | 0.078125             | 1.193                 | 0.034 |
| 20091211.RT.ST | ST.C2     | 0.0125               | 1.107                 | 0.018 | 20100208.PD.SL | SL.C2     | 0.15625              | 1.05                  | 0.028 |

Table S2 continued

| Experiment     | Condition | Drug Dose ( $\mu$ M) | Effect (rel. to DMSO) | STD   | Experiment     | Condition | Drug Dose ( $\mu$ M) | Effect (rel. to DMSO) | STD   |
|----------------|-----------|----------------------|-----------------------|-------|----------------|-----------|----------------------|-----------------------|-------|
| 20091211.RT.ST | ST.C3     | 0.025                | 1.089                 | 0.052 | 20100208.PD.SL | SL.C3     | 0.3125               | 1.117                 | 0.047 |
| 20091211.RT.ST | ST.C4     | 0.05                 | 1.053                 | 0.077 | 20100208.PD.SL | SL.C4     | 0.625                | 1.019                 | 0.027 |
| 20091211.RT.ST | ST.C5     | 0.1                  | 1.114                 | 0.052 | 20100208.PD.SL | SL.C5     | 1.25                 | 0.904                 | 0.037 |
| 20091211.RT.ST | ST.C6     | 0.2                  | 1.072                 | 0.049 | 20100208.PD.SL | SL.C6     | 2.5                  | 0.807                 | 0.075 |
| 20091211.RT.ST | ST.C7     | 0.4                  | 0.738                 | 0.044 | 20100208.PD.SL | SL.C7     | 5                    | 0.647                 | 0.036 |
| 20091211.RY.ST | RY.C1     | 0.03125              | 1.098                 | 0.035 | 20100208.PD.SR | PD.C1     | 0.15625              | 0.991                 | 0.02  |
| 20091211.RY.ST | RY.C2     | 0.0625               | 0.989                 | 0.09  | 20100208.PD.SR | PD.C2     | 0.3125               | 0.954                 | 0.048 |
| 20091211.RY.ST | RY.C3     | 0.125                | 0.992                 | 0.05  | 20100208.PD.SR | PD.C3     | 0.625                | 0.846                 | 0.04  |
| 20091211.RY.ST | RY.C4     | 0.25                 | 1.036                 | 0.015 | 20100208.PD.SR | PD.C4     | 1.25                 | 0.83                  | 0.038 |
| 20091211.RY.ST | RY.C5     | 0.5                  | 1.003                 | 0.043 | 20100208.PD.SR | PD.C5     | 2.5                  | 0.641                 | 0.03  |
| 20091211.RY.ST | RY.C6     | 1                    | 0.724                 | 0.027 | 20100208.PD.SR | PD.C6     | 5                    | 0.402                 | 0.015 |
| 20091211.RY.ST | RY.C7     | 2                    | 0.089                 | 0.031 | 20100208.PD.SR | PD.C7     | 10                   | 0.26                  | 0.042 |
| 20091211.RY.ST | RY.ST.C1  | RY.ST.C1             | 1.009                 | 0.041 | 20100208.PD.SR | PD.SR.C1  | PD.SR.C1             | 0.922                 | 0.052 |
| 20091211.RY.ST | RY.ST.C2  | RY.ST.C2             | 1.041                 | 0.053 | 20100208.PD.SR | PD.SR.C2  | PD.SR.C2             | 0.937                 | 0.054 |
| 20091211.RY.ST | RY.ST.C3  | RY.ST.C3             | 0.945                 | 0.058 | 20100208.PD.SR | PD.SR.C3  | PD.SR.C3             | 0.878                 | 0.056 |
| 20091211.RY.ST | RY.ST.C4  | RY.ST.C4             | 1.003                 | 0.048 | 20100208.PD.SR | PD.SR.C4  | PD.SR.C4             | 0.783                 | 0.047 |
| 20091211.RY.ST | RY.ST.C5  | RY.ST.C5             | 0.989                 | 0.017 | 20100208.PD.SR | PD.SR.C5  | PD.SR.C5             | 0.618                 | 0.054 |
| 20091211.RY.ST | RY.ST.C6  | RY.ST.C6             | 0.572                 | 0.062 | 20100208.PD.SR | PD.SR.C6  | PD.SR.C6             | 0.397                 | 0.034 |
| 20091211.RY.ST | RY.ST.C7  | RY.ST.C7             | 0.02                  | 0.012 | 20100208.PD.SR | PD.SR.C7  | PD.SR.C7             | 0.263                 | 0.014 |
| 20091211.RY.ST | ST.C1     | 0.00625              | 1.145                 | 0.102 | 20100208.PD.SR | SR.C1     | 0.078125             | 1.099                 | 0.036 |
| 20091211.RY.ST | ST.C2     | 0.0125               | 1.107                 | 0.018 | 20100208.PD.SR | SR.C2     | 0.15625              | 1.106                 | 0.037 |
| 20091211.RY.ST | ST.C3     | 0.025                | 1.089                 | 0.052 | 20100208.PD.SR | SR.C3     | 0.3125               | 0.96                  | 0.099 |
| 20091211.RY.ST | ST.C4     | 0.05                 | 1.053                 | 0.077 | 20100208.PD.SR | SR.C4     | 0.625                | 1.047                 | 0.077 |
| 20091211.RY.ST | ST.C5     | 0.1                  | 1.114                 | 0.052 | 20100208.PD.SR | SR.C5     | 1.25                 | 0.981                 | 0.082 |
| 20091211.RY.ST | ST.C6     | 0.2                  | 1.072                 | 0.049 | 20100208.PD.SR | SR.C6     | 2.5                  | 1.035                 | 0.055 |
| 20091211.RY.ST | ST.C7     | 0.4                  | 0.738                 | 0.044 | 20100208.PD.SR | SR.C7     | 5                    | 0.981                 | 0.094 |
| 20091215.AK.RY | AK.C1     | 0.3125               | 0.951                 | 0.028 | 20100208.SL.SR | SL.C1     | 0.078125             | 1.193                 | 0.034 |
| 20091215.AK.RY | AK.C2     | 0.625                | 0.935                 | 0.035 | 20100208.SL.SR | SL.C2     | 0.15625              | 1.05                  | 0.028 |
| 20091215.AK.RY | AK.C3     | 1.25                 | 0.878                 | 0.047 | 20100208.SL.SR | SL.C3     | 0.3125               | 1.117                 | 0.047 |
| 20091215.AK.RY | AK.C4     | 2.5                  | 0.803                 | 0.024 | 20100208.SL.SR | SL.C4     | 0.625                | 1.019                 | 0.027 |
| 20091215.AK.RY | AK.C5     | 5                    | 0.674                 | 0.066 | 20100208.SL.SR | SL.C5     | 1.25                 | 0.904                 | 0.037 |
| 20091215.AK.RY | AK.C6     | 10                   | 0.33                  | 0.024 | 20100208.SL.SR | SL.C6     | 2.5                  | 0.807                 | 0.075 |
| 20091215.AK.RY | AK.C7     | 20                   | 0.217                 | 0.012 | 20100208.SL.SR | SL.C7     | 5                    | 0.647                 | 0.036 |
| 20091215.AK.RY | AK.RY.C1  | AK.RY.C1             | 0.884                 | 0.006 | 20100208.SL.SR | SL.SR.C1  | SL.SR.C1             | 0.974                 | 0.042 |
| 20091215.AK.RY | AK.RY.C2  | AK.RY.C2             | 0.874                 | 0.046 | 20100208.SL.SR | SL.SR.C2  | SL.SR.C2             | 1.02                  | 0.085 |
| 20091215.AK.RY | AK.RY.C3  | AK.RY.C3             | 0.832                 | 0.016 | 20100208.SL.SR | SL.SR.C3  | SL.SR.C3             | 0.977                 | 0.061 |
| 20091215.AK.RY | AK.RY.C4  | AK.RY.C4             | 0.823                 | 0.031 | 20100208.SL.SR | SL.SR.C4  | SL.SR.C4             | 0.91                  | 0.019 |
| 20091215.AK.RY | AK.RY.C5  | AK.RY.C5             | 0.529                 | 0.068 | 20100208.SL.SR | SL.SR.C5  | SL.SR.C5             | 0.827                 | 0.038 |
| 20091215.AK.RY | AK.RY.C6  | AK.RY.C6             | 0.198                 | 0.017 | 20100208.SL.SR | SL.SR.C6  | SL.SR.C6             | 0.782                 | 0.058 |
| 20091215.AK.RY | AK.RY.C7  | AK.RY.C7             | 0.012                 | 0.001 | 20100208.SL.SR | SL.SR.C7  | SL.SR.C7             | 0.553                 | 0.027 |
| 20091215.AK.RY | RY.C1     | 0.03125              | 0.941                 | 0.04  | 20100208.SL.SR | SR.C1     | 0.078125             | 1.099                 | 0.036 |
| 20091215.AK.RY | RY.C2     | 0.0625               | 0.975                 | 0.044 | 20100208.SL.SR | SR.C2     | 0.15625              | 1.106                 | 0.037 |
| 20091215.AK.RY | RY.C3     | 0.125                | 0.959                 | 0.018 | 20100208.SL.SR | SR.C3     | 0.3125               | 0.96                  | 0.099 |
| 20091215.AK.RY | RY.C4     | 0.25                 | 0.929                 | 0.04  | 20100208.SL.SR | SR.C4     | 0.625                | 1.047                 | 0.077 |
| 20091215.AK.RY | RY.C5     | 0.5                  | 0.964                 | 0.045 | 20100208.SL.SR | SR.C5     | 1.25                 | 0.981                 | 0.082 |
| 20091215.AK.RY | RY.C6     | 1                    | 0.681                 | 0.048 | 20100208.SL.SR | SR.C6     | 2.5                  | 1.035                 | 0.055 |
| 20091215.AK.RY | RY.C7     | 2                    | 0.117                 | 0.02  | 20100208.SL.SR | SR.C7     | 5                    | 0.981                 | 0.094 |
| 20091221.AG.HN | AG.C1     | 0.078125             | 0.958                 | 0.037 | 20100212.ER.HN | ER.C1     | 0.078125             | 1                     | 0.029 |
| 20091221.AG.HN | AG.C2     | 0.15625              | 1.044                 | 0.1   | 20100212.ER.HN | ER.C2     | 0.15625              | 0.942                 | 0.055 |
| 20091221.AG.HN | AG.C3     | 0.3125               | 0.976                 | 0.026 | 20100212.ER.HN | ER.C3     | 0.3125               | 0.951                 | 0.027 |
| 20091221.AG.HN | AG.C4     | 0.625                | 0.979                 | 0.078 | 20100212.ER.HN | ER.C4     | 0.625                | 0.922                 | 0.041 |
| 20091221.AG.HN | AG.C5     | 1.25                 | 0.945                 | 0.063 | 20100212.ER.HN | ER.C5     | 1.25                 | 0.931                 | 0.037 |
| 20091221.AG.HN | AG.C6     | 2.5                  | 0.827                 | 0.066 | 20100212.ER.HN | ER.C6     | 2.5                  | 0.924                 | 0.032 |
| 20091221.AG.HN | AG.C7     | 5                    | 0.857                 | 0.078 | 20100212.ER.HN | ER.C7     | 5                    | 0.965                 | 0.079 |
| 20091221.AG.HN | AG.HN.C1  | AG.HN.C1             | 0.955                 | 0.056 | 20100212.ER.HN | ER.HN.C1  | ER.HN.C1             | 0.957                 | 0.057 |
| 20091221.AG.HN | AG.HN.C2  | AG.HN.C2             | 0.933                 | 0.048 | 20100212.ER.HN | ER.HN.C2  | ER.HN.C2             | 0.851                 | 0.036 |
| 20091221.AG.HN | AG.HN.C3  | AG.HN.C3             | 0.809                 | 0.03  | 20100212.ER.HN | ER.HN.C3  | ER.HN.C3             | 0.908                 | 0.054 |
| 20091221.AG.HN | AG.HN.C4  | AG.HN.C4             | 0.756                 | 0.049 | 20100212.ER.HN | ER.HN.C4  | ER.HN.C4             | 0.707                 | 0.04  |
| 20091221.AG.HN | AG.HN.C5  | AG.HN.C5             | 0.606                 | 0.023 | 20100212.ER.HN | ER.HN.C5  | ER.HN.C5             | 0.57                  | 0.039 |
| 20091221.AG.HN | AG.HN.C6  | AG.HN.C6             | 0.234                 | 0.013 | 20100212.ER.HN | ER.HN.C6  | ER.HN.C6             | 0.28                  | 0.021 |
| 20091221.AG.HN | AG.HN.C7  | AG.HN.C7             | 0.055                 | 0.009 | 20100212.ER.HN | ER.HN.C7  | ER.HN.C7             | 0.049                 | 0.004 |
| 20091221.AG.HN | HN.C1     | 0.3125               | 1                     | 0.074 | 20100212.ER.HN | HN.C1     | 0.3125               | 0.993                 | 0.063 |
| 20091221.AG.HN | HN.C2     | 0.625                | 0.907                 | 0.08  | 20100212.ER.HN | HN.C2     | 0.625                | 1.105                 | 0.064 |
| 20091221.AG.HN | HN.C3     | 1.25                 | 0.833                 | 0.059 | 20100212.ER.HN | HN.C3     | 1.25                 | 0.998                 | 0.045 |
| 20091221.AG.HN | HN.C4     | 2.5                  | 0.779                 | 0.072 | 20100212.ER.HN | HN.C4     | 2.5                  | 0.927                 | 0.133 |
| 20091221.AG.HN | HN.C5     | 5                    | 0.642                 | 0.084 | 20100212.ER.HN | HN.C5     | 5                    | 0.672                 | 0.122 |
| 20091221.AG.HN | HN.C6     | 10                   | 0.296                 | 0.046 | 20100212.ER.HN | HN.C6     | 10                   | 0.398                 | 0.124 |
| 20091221.AG.HN | HN.C7     | 20                   | 0.058                 | 0.014 | 20100212.ER.HN | HN.C7     | 20                   | 0.069                 | 0.028 |
| 20091221.AG.SL | AG.C1     | 0.078125             | 0.958                 | 0.037 | 20100212.GF.PI | GF.C1     | 0.3125               | 1.047                 | 0.081 |

Table S2 continued

| Experiment     | Condition | Drug Dose ( $\mu$ M) | Effect (rel. to DMSO) | STD   | Experiment     | Condition | Drug Dose ( $\mu$ M) | Effect (rel. to DMSO) | STD   |
|----------------|-----------|----------------------|-----------------------|-------|----------------|-----------|----------------------|-----------------------|-------|
| 20091221.AG.SL | AG.C2     | 0.15625              | 1.044                 | 0.1   | 20100212.GF.PI | GFC2      | 0.625                | 0.961                 | 0.045 |
| 20091221.AG.SL | AG.C3     | 0.3125               | 0.976                 | 0.026 | 20100212.GF.PI | GFC3      | 1.25                 | 0.938                 | 0.041 |
| 20091221.AG.SL | AG.C4     | 0.625                | 0.979                 | 0.078 | 20100212.GF.PI | GFC4      | 2.5                  | 0.86                  | 0.053 |
| 20091221.AG.SL | AG.C5     | 1.25                 | 0.945                 | 0.063 | 20100212.GF.PI | GFC5      | 5                    | 0.62                  | 0.039 |
| 20091221.AG.SL | AG.C6     | 2.5                  | 0.827                 | 0.066 | 20100212.GF.PI | GFC6      | 10                   | 0.421                 | 0.017 |
| 20091221.AG.SL | AG.C7     | 5                    | 0.857                 | 0.078 | 20100212.GF.PI | GFC7      | 20                   | 0.133                 | 0.006 |
| 20091221.AG.SL | AG.SL.C1  | AG.SL.C1             | 0.942                 | 0.05  | 20100212.GF.PI | GF.PI.C1  | GF.PI.C1             | 0.822                 | 0.083 |
| 20091221.AG.SL | AG.SL.C2  | AG.SL.C2             | 0.877                 | 0.028 | 20100212.GF.PI | GF.PI.C2  | GF.PI.C2             | 0.784                 | 0.065 |
| 20091221.AG.SL | AG.SL.C3  | AG.SL.C3             | 0.815                 | 0.045 | 20100212.GF.PI | GF.PI.C3  | GF.PI.C3             | 0.542                 | 0.042 |
| 20091221.AG.SL | AG.SL.C4  | AG.SL.C4             | 0.696                 | 0.034 | 20100212.GF.PI | GF.PI.C4  | GF.PI.C4             | 0.422                 | 0.021 |
| 20091221.AG.SL | AG.SL.C5  | AG.SL.C5             | 0.427                 | 0.045 | 20100212.GF.PI | GF.PI.C5  | GF.PI.C5             | 0.274                 | 0.014 |
| 20091221.AG.SL | AG.SL.C6  | AG.SL.C6             | 0.322                 | 0.03  | 20100212.GF.PI | GF.PI.C6  | GF.PI.C6             | 0.13                  | 0.014 |
| 20091221.AG.SL | AG.SL.C7  | AG.SL.C7             | 0.216                 | 0.018 | 20100212.GF.PI | GF.PI.C7  | GF.PI.C7             | 0.044                 | 0.002 |
| 20091221.AG.SL | SL.C1     | 0.078125             | 1.019                 | 0.03  | 20100212.GF.PI | PI.C1     | 0.0625               | 0.955                 | 0.013 |
| 20091221.AG.SL | SL.C2     | 0.15625              | 1.005                 | 0.035 | 20100212.GF.PI | PI.C2     | 0.125                | 0.867                 | 0.036 |
| 20091221.AG.SL | SL.C3     | 0.3125               | 1.017                 | 0.046 | 20100212.GF.PI | PI.C3     | 0.25                 | 0.653                 | 0.048 |
| 20091221.AG.SL | SL.C4     | 0.625                | 1.019                 | 0.031 | 20100212.GF.PI | PI.C4     | 0.5                  | 0.529                 | 0.023 |
| 20091221.AG.SL | SL.C5     | 1.25                 | 0.904                 | 0.044 | 20100212.GF.PI | PI.C5     | 1                    | 0.368                 | 0.014 |
| 20091221.AG.SL | SL.C6     | 2.5                  | 0.966                 | 0.035 | 20100212.GF.PI | PI.C6     | 2                    | 0.27                  | 0.017 |
| 20091221.AG.SL | SL.C7     | 5                    | 0.903                 | 0.049 | 20100212.GF.PI | PI.C7     | 4                    | 0.199                 | 0.004 |
| 20091221.HN.PI | HN.C1     | 0.3125               | 1                     | 0.074 | 20100212.GFRT  | GFC1      | 0.3125               | 1.047                 | 0.081 |
| 20091221.HN.PI | HN.C2     | 0.625                | 0.907                 | 0.08  | 20100212.GFRT  | GFC2      | 0.625                | 0.961                 | 0.045 |
| 20091221.HN.PI | HN.C3     | 1.25                 | 0.833                 | 0.059 | 20100212.GFRT  | GFC3      | 1.25                 | 0.938                 | 0.041 |
| 20091221.HN.PI | HN.C4     | 2.5                  | 0.779                 | 0.072 | 20100212.GFRT  | GFC4      | 2.5                  | 0.86                  | 0.053 |
| 20091221.HN.PI | HN.C5     | 5                    | 0.642                 | 0.084 | 20100212.GFRT  | GFC5      | 5                    | 0.62                  | 0.039 |
| 20091221.HN.PI | HN.C6     | 10                   | 0.296                 | 0.046 | 20100212.GFRT  | GFC6      | 10                   | 0.421                 | 0.017 |
| 20091221.HN.PI | HN.C7     | 20                   | 0.058                 | 0.014 | 20100212.GFRT  | GFC7      | 20                   | 0.133                 | 0.006 |
| 20091221.HN.PI | HN.PI.C1  | HN.PI.C1             | 1.177                 | 0.064 | 20100212.GFRT  | GFRT.C1   | GFRT.C1              | 0.963                 | 0.029 |
| 20091221.HN.PI | HN.PI.C2  | HN.PI.C2             | 1.026                 | 0.044 | 20100212.GFRT  | GFRT.C2   | GFRT.C2              | 0.988                 | 0.043 |
| 20091221.HN.PI | HN.PI.C3  | HN.PI.C3             | 0.931                 | 0.031 | 20100212.GFRT  | GFRT.C3   | GFRT.C3              | 0.93                  | 0.024 |
| 20091221.HN.PI | HN.PI.C4  | HN.PI.C4             | 0.845                 | 0.043 | 20100212.GFRT  | GFRT.C4   | GFRT.C4              | 0.873                 | 0.026 |
| 20091221.HN.PI | HN.PI.C5  | HN.PI.C5             | 0.549                 | 0.016 | 20100212.GFRT  | GFRT.C5   | GFRT.C5              | 0.686                 | 0.078 |
| 20091221.HN.PI | HN.PI.C6  | HN.PI.C6             | 0.376                 | 0.022 | 20100212.GFRT  | GFRT.C6   | GFRT.C6              | 0.385                 | 0.03  |
| 20091221.HN.PI | HN.PI.C7  | HN.PI.C7             | 0.263                 | 0.015 | 20100212.GFRT  | GFRT.C7   | GFRT.C7              | 0.106                 | 0.006 |
| 20091221.HN.PI | PI.C1     | 0.0625               | 0.874                 | 0.063 | 20100212.GFRT  | RT.C1     | 0.078125             | 1.053                 | 0.043 |
| 20091221.HN.PI | PI.C2     | 0.125                | 0.775                 | 0.077 | 20100212.GFRT  | RT.C2     | 0.15625              | 1.009                 | 0.033 |
| 20091221.HN.PI | PI.C3     | 0.25                 | 0.705                 | 0.025 | 20100212.GFRT  | RT.C3     | 0.3125               | 0.971                 | 0.041 |
| 20091221.HN.PI | PI.C4     | 0.5                  | 0.628                 | 0.027 | 20100212.GFRT  | RT.C4     | 0.625                | 0.939                 | 0.054 |
| 20091221.HN.PI | PI.C5     | 1                    | 0.453                 | 0.025 | 20100212.GFRT  | RT.C5     | 1.25                 | 0.945                 | 0.049 |
| 20091221.HN.PI | PI.C6     | 2                    | 0.295                 | 0.031 | 20100212.GFRT  | RT.C6     | 2.5                  | 0.808                 | 0.033 |
| 20091221.HN.PI | PI.C7     | 4                    | 0.218                 | 0.007 | 20100212.GFRT  | RT.C7     | 5                    | 0.672                 | 0.09  |
| 20091221.HN.SL | HN.C1     | 0.3125               | 1                     | 0.074 | 20100212.PI.RT | PI.C1     | 0.0625               | 0.955                 | 0.013 |
| 20091221.HN.SL | HN.C2     | 0.625                | 0.907                 | 0.08  | 20100212.PI.RT | PI.C2     | 0.125                | 0.867                 | 0.036 |
| 20091221.HN.SL | HN.C3     | 1.25                 | 0.833                 | 0.059 | 20100212.PI.RT | PI.C3     | 0.25                 | 0.653                 | 0.048 |
| 20091221.HN.SL | HN.C4     | 2.5                  | 0.779                 | 0.072 | 20100212.PI.RT | PI.C4     | 0.5                  | 0.529                 | 0.023 |
| 20091221.HN.SL | HN.C5     | 5                    | 0.642                 | 0.084 | 20100212.PI.RT | PI.C5     | 1                    | 0.368                 | 0.014 |
| 20091221.HN.SL | HN.C6     | 10                   | 0.296                 | 0.046 | 20100212.PI.RT | PI.C6     | 2                    | 0.27                  | 0.017 |
| 20091221.HN.SL | HN.C7     | 20                   | 0.058                 | 0.014 | 20100212.PI.RT | PI.C7     | 4                    | 0.199                 | 0.004 |
| 20091221.HN.SL | HN.SL.C1  | HN.SL.C1             | 0.994                 | 0.039 | 20100212.PI.RT | PI.RT.C1  | PI.RT.C1             | 0.925                 | 0.034 |
| 20091221.HN.SL | HN.SL.C2  | HN.SL.C2             | 0.929                 | 0.053 | 20100212.PI.RT | PI.RT.C2  | PI.RT.C2             | 0.855                 | 0.049 |
| 20091221.HN.SL | HN.SL.C3  | HN.SL.C3             | 0.885                 | 0.068 | 20100212.PI.RT | PI.RT.C3  | PI.RT.C3             | 0.635                 | 0.07  |
| 20091221.HN.SL | HN.SL.C4  | HN.SL.C4             | 0.8                   | 0.05  | 20100212.PI.RT | PI.RT.C4  | PI.RT.C4             | 0.501                 | 0.034 |
| 20091221.HN.SL | HN.SL.C5  | HN.SL.C5             | 0.616                 | 0.031 | 20100212.PI.RT | PI.RT.C5  | PI.RT.C5             | 0.382                 | 0.017 |
| 20091221.HN.SL | HN.SL.C6  | HN.SL.C6             | 0.293                 | 0.033 | 20100212.PI.RT | PI.RT.C6  | PI.RT.C6             | 0.193                 | 0.018 |
| 20091221.HN.SL | HN.SL.C7  | HN.SL.C7             | 0.044                 | 0.003 | 20100212.PI.RT | PI.RT.C7  | PI.RT.C7             | 0.084                 | 0.009 |
| 20091221.HN.SL | SL.C1     | 0.078125             | 1.019                 | 0.03  | 20100212.PI.RT | RT.C1     | 0.078125             | 1.053                 | 0.043 |
| 20091221.HN.SL | SL.C2     | 0.15625              | 1.005                 | 0.035 | 20100212.PI.RT | RT.C2     | 0.15625              | 1.009                 | 0.033 |
| 20091221.HN.SL | SL.C3     | 0.3125               | 1.017                 | 0.046 | 20100212.PI.RT | RT.C3     | 0.3125               | 0.971                 | 0.041 |
| 20091221.HN.SL | SL.C4     | 0.625                | 1.019                 | 0.031 | 20100212.PI.RT | RT.C4     | 0.625                | 0.939                 | 0.054 |
| 20091221.HN.SL | SL.C5     | 1.25                 | 0.904                 | 0.044 | 20100212.PI.RT | RT.C5     | 1.25                 | 0.945                 | 0.049 |
| 20091221.HN.SL | SL.C6     | 2.5                  | 0.966                 | 0.035 | 20100212.PI.RT | RT.C6     | 2.5                  | 0.808                 | 0.033 |
| 20091221.HN.SL | SL.C7     | 5                    | 0.903                 | 0.049 | 20100212.PI.RT | RT.C7     | 5                    | 0.672                 | 0.09  |
| 20091221.HN.SR | HN.C1     | 0.3125               | 1                     | 0.074 | 20100216.AG.SU | AG.C1     | 0.078125             | 1.229                 | 0.129 |
| 20091221.HN.SR | HN.C2     | 0.625                | 0.907                 | 0.08  | 20100216.AG.SU | AG.C2     | 0.15625              | 1.059                 | 0.073 |
| 20091221.HN.SR | HN.C3     | 1.25                 | 0.833                 | 0.059 | 20100216.AG.SU | AG.C3     | 0.3125               | 1                     | 0.029 |
| 20091221.HN.SR | HN.C4     | 2.5                  | 0.779                 | 0.072 | 20100216.AG.SU | AG.C4     | 0.625                | 0.949                 | 0.031 |
| 20091221.HN.SR | HN.C5     | 5                    | 0.642                 | 0.084 | 20100216.AG.SU | AG.C5     | 1.25                 | 0.922                 | 0.04  |
| 20091221.HN.SR | HN.C6     | 10                   | 0.296                 | 0.046 | 20100216.AG.SU | AG.C6     | 2.5                  | 0.905                 | 0.057 |
| 20091221.HN.SR | HN.C7     | 20                   | 0.058                 | 0.014 | 20100216.AG.SU | AG.C7     | 5                    | 0.866                 | 0.067 |



Table S2 continued

| Experiment     | Condition | Drug Dose ( $\mu$ M) | Effect (rel. to DMSO) | STD   | Experiment     | Condition | Drug Dose ( $\mu$ M) | Effect (rel. to DMSO) | STD   |
|----------------|-----------|----------------------|-----------------------|-------|----------------|-----------|----------------------|-----------------------|-------|
| 20091221.HN.SR | HN.SR.C1  | HN.SR.C1             | 1.005                 | 0.064 | 20100216.AG.SU | AG.SU.C1  | AG.SU.C1             | 1.14                  | 0.045 |
| 20091221.HN.SR | HN.SR.C2  | HN.SR.C2             | 0.995                 | 0.045 | 20100216.AG.SU | AG.SU.C2  | AG.SU.C2             | 1.126                 | 0.045 |
| 20091221.HN.SR | HN.SR.C3  | HN.SR.C3             | 0.972                 | 0.052 | 20100216.AG.SU | AG.SU.C3  | AG.SU.C3             | 1.11                  | 0.029 |
| 20091221.HN.SR | HN.SR.C4  | HN.SR.C4             | 0.86                  | 0.053 | 20100216.AG.SU | AG.SU.C4  | AG.SU.C4             | 0.95                  | 0.073 |
| 20091221.HN.SR | HN.SR.C5  | HN.SR.C5             | 0.685                 | 0.049 | 20100216.AG.SU | AG.SU.C5  | AG.SU.C5             | 0.658                 | 0.32  |
| 20091221.HN.SR | HN.SR.C6  | HN.SR.C6             | 0.332                 | 0.021 | 20100216.AG.SU | AG.SU.C6  | AG.SU.C6             | 0.578                 | 0.013 |
| 20091221.HN.SR | HN.SR.C7  | HN.SR.C7             | 0.094                 | 0.011 | 20100216.AG.SU | AG.SU.C7  | AG.SU.C7             | 0.355                 | 0.018 |
| 20091221.HN.SR | SR.C1     | 0.078125             | 0.946                 | 0.098 | 20100216.AG.SU | SU.C1     | 0.3125               | 1.171                 | 0.114 |
| 20091221.HN.SR | SR.C2     | 0.15625              | 0.998                 | 0.116 | 20100216.AG.SU | SU.C2     | 0.625                | 1.137                 | 0.118 |
| 20091221.HN.SR | SR.C3     | 0.3125               | 1.069                 | 0.123 | 20100216.AG.SU | SU.C3     | 1.25                 | 1.058                 | 0.041 |
| 20091221.HN.SR | SR.C4     | 0.625                | 1.089                 | 0.115 | 20100216.AG.SU | SU.C4     | 2.5                  | 0.818                 | 0.05  |
| 20091221.HN.SR | SR.C5     | 1.25                 | 1.058                 | 0.12  | 20100216.AG.SU | SU.C5     | 5                    | 0.605                 | 0.059 |
| 20091221.HN.SR | SR.C6     | 2.5                  | 1.093                 | 0.121 | 20100216.AG.SU | SU.C6     | 10                   | 0.575                 | 0.026 |
| 20091221.HN.SR | SR.C7     | 5                    | 1.044                 | 0.156 | 20100216.AG.SU | SU.C7     | 20                   | 0.316                 | 0.025 |
| 20091221.PI.SL | PI.C1     | 0.0625               | 0.874                 | 0.063 | 20100216.AK.HN | AK.C1     | 0.3125               | 0.96                  | 0.089 |
| 20091221.PI.SL | PI.C2     | 0.125                | 0.775                 | 0.077 | 20100216.AK.HN | AK.C2     | 0.625                | 0.808                 | 0.062 |
| 20091221.PI.SL | PI.C3     | 0.25                 | 0.705                 | 0.025 | 20100216.AK.HN | AK.C3     | 1.25                 | 0.831                 | 0.087 |
| 20091221.PI.SL | PI.C4     | 0.5                  | 0.628                 | 0.027 | 20100216.AK.HN | AK.C4     | 2.5                  | 0.746                 | 0.024 |
| 20091221.PI.SL | PI.C5     | 1                    | 0.453                 | 0.025 | 20100216.AK.HN | AK.C5     | 5                    | 0.609                 | 0.064 |
| 20091221.PI.SL | PI.C6     | 2                    | 0.295                 | 0.031 | 20100216.AK.HN | AK.C6     | 10                   | 0.365                 | 0.021 |
| 20091221.PI.SL | PI.C7     | 4                    | 0.218                 | 0.007 | 20100216.AK.HN | AK.C7     | 20                   | 0.193                 | 0.016 |
| 20091221.PI.SL | PI.SL.C1  | PI.SL.C1             | 0.976                 | 0.029 | 20100216.AK.HN | AK.HN.C1  | AK.HN.C1             | 0.893                 | 0.03  |
| 20091221.PI.SL | PI.SL.C2  | PI.SL.C2             | 0.925                 | 0.065 | 20100216.AK.HN | AK.HN.C2  | AK.HN.C2             | 0.897                 | 0.038 |
| 20091221.PI.SL | PI.SL.C3  | PI.SL.C3             | 0.717                 | 0.062 | 20100216.AK.HN | AK.HN.C3  | AK.HN.C3             | 0.826                 | 0.028 |
| 20091221.PI.SL | PI.SL.C4  | PI.SL.C4             | 0.523                 | 0.009 | 20100216.AK.HN | AK.HN.C4  | AK.HN.C4             | 0.748                 | 0.042 |
| 20091221.PI.SL | PI.SL.C5  | PI.SL.C5             | 0.345                 | 0.011 | 20100216.AK.HN | AK.HN.C5  | AK.HN.C5             | 0.511                 | 0.015 |
| 20091221.PI.SL | PI.SL.C6  | PI.SL.C6             | 0.151                 | 0.009 | 20100216.AK.HN | AK.HN.C6  | AK.HN.C6             | 0.288                 | 0.013 |
| 20091221.PI.SL | PI.SL.C7  | PI.SL.C7             | 0.05                  | 0.003 | 20100216.AK.HN | AK.HN.C7  | AK.HN.C7             | 0.006                 | 0.001 |
| 20091221.PI.SL | SL.C1     | 0.078125             | 1.019                 | 0.03  | 20100216.AK.HN | HN.C1     | 0.3125               | 1.203                 | 0.067 |
| 20091221.PI.SL | SL.C2     | 0.15625              | 1.005                 | 0.035 | 20100216.AK.HN | HN.C2     | 0.625                | 1.033                 | 0.125 |
| 20091221.PI.SL | SL.C3     | 0.3125               | 1.017                 | 0.046 | 20100216.AK.HN | HN.C3     | 1.25                 | 0.967                 | 0.092 |
| 20091221.PI.SL | SL.C4     | 0.625                | 1.019                 | 0.031 | 20100216.AK.HN | HN.C4     | 2.5                  | 0.773                 | 0.073 |
| 20091221.PI.SL | SL.C5     | 1.25                 | 0.904                 | 0.044 | 20100216.AK.HN | HN.C5     | 5                    | 0.511                 | 0.038 |
| 20091221.PI.SL | SL.C6     | 2.5                  | 0.966                 | 0.035 | 20100216.AK.HN | HN.C6     | 10                   | 0.256                 | 0.027 |
| 20091221.PI.SL | SL.C7     | 5                    | 0.903                 | 0.049 | 20100216.AK.HN | HN.C7     | 20                   | 0.013                 | 0.003 |
| 20091221.PI.SR | PI.C1     | 0.0625               | 0.874                 | 0.063 | 20100216.ER.SR | ER.C1     | 0.078125             | 1.184                 | 0.037 |
| 20091221.PI.SR | PI.C2     | 0.125                | 0.775                 | 0.077 | 20100216.ER.SR | ER.C2     | 0.15625              | 1.136                 | 0.024 |
| 20091221.PI.SR | PI.C3     | 0.25                 | 0.705                 | 0.025 | 20100216.ER.SR | ER.C3     | 0.3125               | 1.128                 | 0.085 |
| 20091221.PI.SR | PI.C4     | 0.5                  | 0.628                 | 0.027 | 20100216.ER.SR | ER.C4     | 0.625                | 1.099                 | 0.085 |
| 20091221.PI.SR | PI.C5     | 1                    | 0.453                 | 0.025 | 20100216.ER.SR | ER.C5     | 1.25                 | 1.024                 | 0.123 |
| 20091221.PI.SR | PI.C6     | 2                    | 0.295                 | 0.031 | 20100216.ER.SR | ER.C6     | 2.5                  | 1.074                 | 0.094 |
| 20091221.PI.SR | PI.C7     | 4                    | 0.218                 | 0.007 | 20100216.ER.SR | ER.C7     | 5                    | 0.975                 | 0.045 |
| 20091221.PI.SR | PI.SR.C1  | PI.SR.C1             | 1.045                 | 0.042 | 20100216.ER.SR | ER.SR.C1  | ER.SR.C1             | 1.17                  | 0.087 |
| 20091221.PI.SR | PI.SR.C2  | PI.SR.C2             | 1.017                 | 0.091 | 20100216.ER.SR | ER.SR.C2  | ER.SR.C2             | 1.137                 | 0.062 |
| 20091221.PI.SR | PI.SR.C3  | PI.SR.C3             | 0.822                 | 0.035 | 20100216.ER.SR | ER.SR.C3  | ER.SR.C3             | 1.208                 | 0.076 |
| 20091221.PI.SR | PI.SR.C4  | PI.SR.C4             | 0.589                 | 0.026 | 20100216.ER.SR | ER.SR.C4  | ER.SR.C4             | 1.206                 | 0.066 |
| 20091221.PI.SR | PI.SR.C5  | PI.SR.C5             | 0.453                 | 0.036 | 20100216.ER.SR | ER.SR.C5  | ER.SR.C5             | 1.21                  | 0.06  |
| 20091221.PI.SR | PI.SR.C6  | PI.SR.C6             | 0.32                  | 0.023 | 20100216.ER.SR | ER.SR.C6  | ER.SR.C6             | 1.169                 | 0.093 |
| 20091221.PI.SR | PI.SR.C7  | PI.SR.C7             | 0.264                 | 0.018 | 20100216.ER.SR | ER.SR.C7  | ER.SR.C7             | 0.979                 | 0.101 |
| 20091221.PI.SR | SR.C1     | 0.078125             | 0.946                 | 0.098 | 20100216.ER.SR | SR.C1     | 0.078125             | 1.15                  | 0.052 |
| 20091221.PI.SR | SR.C2     | 0.15625              | 0.998                 | 0.116 | 20100216.ER.SR | SR.C2     | 0.15625              | 1.164                 | 0.051 |
| 20091221.PI.SR | SR.C3     | 0.3125               | 1.069                 | 0.123 | 20100216.ER.SR | SR.C3     | 0.3125               | 1.137                 | 0.056 |
| 20091221.PI.SR | SR.C4     | 0.625                | 1.089                 | 0.115 | 20100216.ER.SR | SR.C4     | 0.625                | 1.172                 | 0.083 |
| 20091221.PI.SR | SR.C5     | 1.25                 | 1.058                 | 0.12  | 20100216.ER.SR | SR.C5     | 1.25                 | 1.108                 | 0.066 |
| 20091221.PI.SR | SR.C6     | 2.5                  | 1.093                 | 0.121 | 20100216.ER.SR | SR.C6     | 2.5                  | 1.166                 | 0.057 |
| 20091221.PI.SR | SR.C7     | 5                    | 1.044                 | 0.156 | 20100216.ER.SR | SR.C7     | 5                    | 1.019                 | 0.059 |
| 20091221.SL.SR | SL.C1     | 0.078125             | 1.019                 | 0.03  | 20100216.HN.PD | HN.C1     | 0.3125               | 1.203                 | 0.067 |
| 20091221.SL.SR | SL.C2     | 0.15625              | 1.005                 | 0.035 | 20100216.HN.PD | HN.C2     | 0.625                | 1.033                 | 0.125 |
| 20091221.SL.SR | SL.C3     | 0.3125               | 1.017                 | 0.046 | 20100216.HN.PD | HN.C3     | 1.25                 | 0.967                 | 0.092 |
| 20091221.SL.SR | SL.C4     | 0.625                | 1.019                 | 0.031 | 20100216.HN.PD | HN.C4     | 2.5                  | 0.773                 | 0.073 |
| 20091221.SL.SR | SL.C5     | 1.25                 | 0.904                 | 0.044 | 20100216.HN.PD | HN.C5     | 5                    | 0.511                 | 0.038 |
| 20091221.SL.SR | SL.C6     | 2.5                  | 0.966                 | 0.035 | 20100216.HN.PD | HN.C6     | 10                   | 0.256                 | 0.027 |
| 20091221.SL.SR | SL.C7     | 5                    | 0.903                 | 0.049 | 20100216.HN.PD | HN.C7     | 20                   | 0.013                 | 0.003 |
| 20091221.SL.SR | SL.SR.C1  | SL.SR.C1             | 1.144                 | 0.076 | 20100216.HN.PD | HN.PD.C1  | HN.PD.C1             | 1.021                 | 0.047 |
| 20091221.SL.SR | SL.SR.C2  | SL.SR.C2             | 1.166                 | 0.075 | 20100216.HN.PD | HN.PD.C2  | HN.PD.C2             | 0.96                  | 0.035 |
| 20091221.SL.SR | SL.SR.C3  | SL.SR.C3             | 1.264                 | 0.095 | 20100216.HN.PD | HN.PD.C3  | HN.PD.C3             | 0.778                 | 0.078 |
| 20091221.SL.SR | SL.SR.C4  | SL.SR.C4             | 0.994                 | 0.102 | 20100216.HN.PD | HN.PD.C4  | HN.PD.C4             | 0.58                  | 0.015 |
| 20091221.SL.SR | SL.SR.C5  | SL.SR.C5             | 1.074                 | 0.111 | 20100216.HN.PD | HN.PD.C5  | HN.PD.C5             | 0.421                 | 0.015 |
| 20091221.SL.SR | SL.SR.C6  | SL.SR.C6             | 1.084                 | 0.06  | 20100216.HN.PD | HN.PD.C6  | HN.PD.C6             | 0.195                 | 0.017 |

Table S2 continued

| Experiment     | Condition | Drug Dose ( $\mu$ M) | Effect (rel. to DMSO) | STD   | Experiment     | Condition | Drug Dose ( $\mu$ M) | Effect (rel. to DMSO) | STD   |
|----------------|-----------|----------------------|-----------------------|-------|----------------|-----------|----------------------|-----------------------|-------|
| 20091221.SL.SR | SL.SR.C7  | SL.SR.C7             | 0.916                 | 0.099 | 20100216.HN.PD | HN.PD.C7  | HN.PD.C7             | 0.027                 | 0.005 |
| 20091221.SL.SR | SR.C1     | 0.078125             | 0.946                 | 0.098 | 20100216.HN.PD | PD.C1     | 0.15625              | 1.247                 | 0.119 |
| 20091221.SL.SR | SR.C2     | 0.15625              | 0.998                 | 0.116 | 20100216.HN.PD | PD.C2     | 0.3125               | 1.029                 | 0.057 |
| 20091221.SL.SR | SR.C3     | 0.3125               | 1.069                 | 0.123 | 20100216.HN.PD | PD.C3     | 0.625                | 1.023                 | 0.061 |
| 20091221.SL.SR | SR.C4     | 0.625                | 1.089                 | 0.115 | 20100216.HN.PD | PD.C4     | 1.25                 | 0.884                 | 0.064 |
| 20091221.SL.SR | SR.C5     | 1.25                 | 1.058                 | 0.12  | 20100216.HN.PD | PD.C5     | 2.5                  | 0.681                 | 0.08  |
| 20091221.SL.SR | SR.C6     | 2.5                  | 1.093                 | 0.121 | 20100216.HN.PD | PD.C6     | 5                    | 0.425                 | 0.011 |
| 20091221.SL.SR | SR.C7     | 5                    | 1.044                 | 0.156 | 20100216.HN.PD | PD.C7     | 10                   | 0.284                 | 0.013 |
| 20091229.PD.RT | PD.C1     | 0.15625              | 1.034                 | 0.015 | 20100216.PD.RY | PD.C1     | 0.15625              | 1.247                 | 0.119 |
| 20091229.PD.RT | PD.C2     | 0.3125               | 1.014                 | 0.032 | 20100216.PD.RY | PD.C2     | 0.3125               | 1.029                 | 0.057 |
| 20091229.PD.RT | PD.C3     | 0.625                | 0.997                 | 0.041 | 20100216.PD.RY | PD.C3     | 0.625                | 1.023                 | 0.061 |
| 20091229.PD.RT | PD.C4     | 1.25                 | 0.923                 | 0.098 | 20100216.PD.RY | PD.C4     | 1.25                 | 0.884                 | 0.064 |
| 20091229.PD.RT | PD.C5     | 2.5                  | 0.733                 | 0.059 | 20100216.PD.RY | PD.C5     | 2.5                  | 0.681                 | 0.08  |
| 20091229.PD.RT | PD.C6     | 5                    | 0.551                 | 0.085 | 20100216.PD.RY | PD.C6     | 5                    | 0.425                 | 0.011 |
| 20091229.PD.RT | PD.C7     | 10                   | 0.366                 | 0.034 | 20100216.PD.RY | PD.C7     | 10                   | 0.284                 | 0.013 |
| 20091229.PD.RT | PD.RT.C1  | PD.RT.C1             | 0.954                 | 0.07  | 20100216.PD.RY | PD.RY.C1  | PD.RY.C1             | 0.973                 | 0.027 |
| 20091229.PD.RT | PD.RT.C2  | PD.RT.C2             | 0.983                 | 0.078 | 20100216.PD.RY | PD.RY.C2  | PD.RY.C2             | 0.938                 | 0.046 |
| 20091229.PD.RT | PD.RT.C3  | PD.RT.C3             | 0.899                 | 0.085 | 20100216.PD.RY | PD.RY.C3  | PD.RY.C3             | 0.853                 | 0.078 |
| 20091229.PD.RT | PD.RT.C4  | PD.RT.C4             | 0.743                 | 0.088 | 20100216.PD.RY | PD.RY.C4  | PD.RY.C4             | 0.73                  | 0.049 |
| 20091229.PD.RT | PD.RT.C5  | PD.RT.C5             | 0.587                 | 0.036 | 20100216.PD.RY | PD.RY.C5  | PD.RY.C5             | 0.565                 | 0.022 |
| 20091229.PD.RT | PD.RT.C6  | PD.RT.C6             | 0.227                 | 0.043 | 20100216.PD.RY | PD.RY.C6  | PD.RY.C6             | 0.296                 | 0.019 |
| 20091229.PD.RT | PD.RT.C7  | PD.RT.C7             | 0.147                 | 0.011 | 20100216.PD.RY | PD.RY.C7  | PD.RY.C7             | 0.075                 | 0.005 |
| 20091229.PD.RT | RT.C1     | 0.078125             | 1.083                 | 0.032 | 20100216.PD.RY | RY.C1     | 0.03125              | 1.235                 | 0.029 |
| 20091229.PD.RT | RT.C2     | 0.15625              | 1.05                  | 0.033 | 20100216.PD.RY | RY.C2     | 0.0625               | 1.294                 | 0.032 |
| 20091229.PD.RT | RT.C3     | 0.3125               | 0.979                 | 0.079 | 20100216.PD.RY | RY.C3     | 0.125                | 1.351                 | 0.055 |
| 20091229.PD.RT | RT.C4     | 0.625                | 1.012                 | 0.095 | 20100216.PD.RY | RY.C4     | 0.25                 | 1.302                 | 0.054 |
| 20091229.PD.RT | RT.C5     | 1.25                 | 0.756                 | 0.054 | 20100216.PD.RY | RY.C5     | 0.5                  | 1.037                 | 0.11  |
| 20091229.PD.RT | RT.C6     | 2.5                  | 0.327                 | 0.049 | 20100216.PD.RY | RY.C6     | 1                    | 0.446                 | 0.094 |
| 20091229.PD.RT | RT.C7     | 5                    | 0.164                 | 0.014 | 20100216.PD.RY | RY.C7     | 2                    | 0.059                 | 0.002 |
| 20091229.PD.ST | PD.C1     | 0.15625              | 1.034                 | 0.015 | 20100216.RY.SL | RY.C1     | 0.03125              | 1.235                 | 0.029 |
| 20091229.PD.ST | PD.C2     | 0.3125               | 1.014                 | 0.032 | 20100216.RY.SL | RY.C2     | 0.0625               | 1.294                 | 0.032 |
| 20091229.PD.ST | PD.C3     | 0.625                | 0.997                 | 0.041 | 20100216.RY.SL | RY.C3     | 0.125                | 1.351                 | 0.055 |
| 20091229.PD.ST | PD.C4     | 1.25                 | 0.923                 | 0.098 | 20100216.RY.SL | RY.C4     | 0.25                 | 1.302                 | 0.054 |
| 20091229.PD.ST | PD.C5     | 2.5                  | 0.733                 | 0.059 | 20100216.RY.SL | RY.C5     | 0.5                  | 1.037                 | 0.11  |
| 20091229.PD.ST | PD.C6     | 5                    | 0.551                 | 0.085 | 20100216.RY.SL | RY.C6     | 1                    | 0.446                 | 0.094 |
| 20091229.PD.ST | PD.C7     | 10                   | 0.366                 | 0.034 | 20100216.RY.SL | RY.C7     | 2                    | 0.059                 | 0.002 |
| 20091229.PD.ST | PD.ST.C1  | PD.ST.C1             | 1.011                 | 0.056 | 20100216.RY.SL | RY.SL.C1  | RY.SL.C1             | 1.021                 | 0.043 |
| 20091229.PD.ST | PD.ST.C2  | PD.ST.C2             | 1.008                 | 0.07  | 20100216.RY.SL | RY.SL.C2  | RY.SL.C2             | 1.087                 | 0.053 |
| 20091229.PD.ST | PD.ST.C3  | PD.ST.C3             | 0.781                 | 0.065 | 20100216.RY.SL | RY.SL.C3  | RY.SL.C3             | 1.13                  | 0.044 |
| 20091229.PD.ST | PD.ST.C4  | PD.ST.C4             | 0.511                 | 0.085 | 20100216.RY.SL | RY.SL.C4  | RY.SL.C4             | 1.09                  | 0.084 |
| 20091229.PD.ST | PD.ST.C5  | PD.ST.C5             | 0.228                 | 0.033 | 20100216.RY.SL | RY.SL.C5  | RY.SL.C5             | 1.042                 | 0.047 |
| 20091229.PD.ST | PD.ST.C6  | PD.ST.C6             | 0.001                 | 0.001 | 20100216.RY.SL | RY.SL.C6  | RY.SL.C6             | 0.478                 | 0.026 |
| 20091229.PD.ST | PD.ST.C7  | PD.ST.C7             | -0.003                | 0.001 | 20100216.RY.SL | RY.SL.C7  | RY.SL.C7             | 0.056                 | 0.001 |
| 20091229.PD.ST | ST.C1     | 0.078125             | 1.014                 | 0.068 | 20100216.RY.SL | SL.C1     | 0.078125             | 1.117                 | 0.041 |
| 20091229.PD.ST | ST.C2     | 0.15625              | 0.998                 | 0.058 | 20100216.RY.SL | SL.C2     | 0.15625              | 1.076                 | 0.044 |
| 20091229.PD.ST | ST.C3     | 0.3125               | 0.873                 | 0.026 | 20100216.RY.SL | SL.C3     | 0.3125               | 1.052                 | 0.055 |
| 20091229.PD.ST | ST.C4     | 0.625                | 0.595                 | 0.05  | 20100216.RY.SL | SL.C4     | 0.625                | 0.953                 | 0.059 |
| 20091229.PD.ST | ST.C5     | 1.25                 | 0.277                 | 0.036 | 20100216.RY.SL | SL.C5     | 1.25                 | 0.992                 | 0.064 |
| 20091229.PD.ST | ST.C6     | 2.5                  | 0.011                 | 0.012 | 20100216.RY.SL | SL.C6     | 2.5                  | 0.887                 | 0.078 |
| 20091229.PD.ST | ST.C7     | 5                    | -0.001                | 0.002 | 20100216.RY.SL | SL.C7     | 5                    | 0.851                 | 0.085 |
| 20091229.PD.SU | PD.C1     | 0.15625              | 1.034                 | 0.015 | 20100216.RY.SR | RY.C1     | 0.03125              | 1.235                 | 0.029 |
| 20091229.PD.SU | PD.C2     | 0.3125               | 1.014                 | 0.032 | 20100216.RY.SR | RY.C2     | 0.0625               | 1.294                 | 0.032 |
| 20091229.PD.SU | PD.C3     | 0.625                | 0.997                 | 0.041 | 20100216.RY.SR | RY.C3     | 0.125                | 1.351                 | 0.055 |
| 20091229.PD.SU | PD.C4     | 1.25                 | 0.923                 | 0.098 | 20100216.RY.SR | RY.C4     | 0.25                 | 1.302                 | 0.054 |
| 20091229.PD.SU | PD.C5     | 2.5                  | 0.733                 | 0.059 | 20100216.RY.SR | RY.C5     | 0.5                  | 1.037                 | 0.11  |
| 20091229.PD.SU | PD.C6     | 5                    | 0.551                 | 0.085 | 20100216.RY.SR | RY.C6     | 1                    | 0.446                 | 0.094 |
| 20091229.PD.SU | PD.C7     | 10                   | 0.366                 | 0.034 | 20100216.RY.SR | RY.C7     | 2                    | 0.059                 | 0.002 |
| 20091229.PD.SU | PD.SU.C1  | PD.SU.C1             | 1.049                 | 0.047 | 20100216.RY.SR | RY.SR.C1  | RY.SR.C1             | 1.08                  | 0.046 |
| 20091229.PD.SU | PD.SU.C2  | PD.SU.C2             | 1.039                 | 0.056 | 20100216.RY.SR | RY.SR.C2  | RY.SR.C2             | 1.144                 | 0.059 |
| 20091229.PD.SU | PD.SU.C3  | PD.SU.C3             | 0.937                 | 0.059 | 20100216.RY.SR | RY.SR.C3  | RY.SR.C3             | 1.149                 | 0.032 |
| 20091229.PD.SU | PD.SU.C4  | PD.SU.C4             | 0.8                   | 0.033 | 20100216.RY.SR | RY.SR.C4  | RY.SR.C4             | 1.277                 | 0.058 |
| 20091229.PD.SU | PD.SU.C5  | PD.SU.C5             | 0.551                 | 0.043 | 20100216.RY.SR | RY.SR.C5  | RY.SR.C5             | 1.277                 | 0.057 |
| 20091229.PD.SU | PD.SU.C6  | PD.SU.C6             | 0.441                 | 0.052 | 20100216.RY.SR | RY.SR.C6  | RY.SR.C6             | 0.758                 | 0.032 |
| 20091229.PD.SU | PD.SU.C7  | PD.SU.C7             | 0.178                 | 0.018 | 20100216.RY.SR | RY.SR.C7  | RY.SR.C7             | 0.05                  | 0.003 |
| 20091229.PD.SU | SU.C1     | 0.3125               | 1.095                 | 0.065 | 20100216.RY.SR | SR.C1     | 0.078125             | 1.15                  | 0.052 |
| 20091229.PD.SU | SU.C2     | 0.625                | 1.083                 | 0.079 | 20100216.RY.SR | SR.C2     | 0.15625              | 1.164                 | 0.051 |
| 20091229.PD.SU | SU.C3     | 1.25                 | 1.092                 | 0.089 | 20100216.RY.SR | SR.C3     | 0.3125               | 1.137                 | 0.056 |
| 20091229.PD.SU | SU.C4     | 2.5                  | 0.926                 | 0.081 | 20100216.RY.SR | SR.C4     | 0.625                | 1.172                 | 0.083 |
| 20091229.PD.SU | SU.C5     | 5                    | 0.721                 | 0.096 | 20100216.RY.SR | SR.C5     | 1.25                 | 1.108                 | 0.066 |

Table S2 continued

| Experiment     | Condition | Drug Dose ( $\mu$ M) | Effect (rel. to DMSO) | STD   | Experiment     | Condition | Drug Dose ( $\mu$ M) | Effect (rel. to DMSO) | STD   |
|----------------|-----------|----------------------|-----------------------|-------|----------------|-----------|----------------------|-----------------------|-------|
| 20091229.PD.SU | SU.C6     | 10                   | 0.568                 | 0.066 | 20100216.RY.SR | SR.C6     | 2.5                  | 1.166                 | 0.057 |
| 20091229.PD.SU | SU.C7     | 20                   | 0.482                 | 0.085 | 20100216.RY.SR | SR.C7     | 5                    | 1.019                 | 0.059 |
| 20091229.RT.ST | RT.C1     | 0.078125             | 1.083                 | 0.032 | 20100216.RY.SU | RY.C1     | 0.03125              | 1.235                 | 0.029 |
| 20091229.RT.ST | RT.C2     | 0.15625              | 1.05                  | 0.033 | 20100216.RY.SU | RY.C2     | 0.0625               | 1.294                 | 0.032 |
| 20091229.RT.ST | RT.C3     | 0.3125               | 0.979                 | 0.079 | 20100216.RY.SU | RY.C3     | 0.125                | 1.351                 | 0.055 |
| 20091229.RT.ST | RT.C4     | 0.625                | 1.012                 | 0.095 | 20100216.RY.SU | RY.C4     | 0.25                 | 1.302                 | 0.054 |
| 20091229.RT.ST | RT.C5     | 1.25                 | 0.756                 | 0.054 | 20100216.RY.SU | RY.C5     | 0.5                  | 1.037                 | 0.11  |
| 20091229.RT.ST | RT.C6     | 2.5                  | 0.327                 | 0.049 | 20100216.RY.SU | RY.C6     | 1                    | 0.446                 | 0.094 |
| 20091229.RT.ST | RT.C7     | 5                    | 0.164                 | 0.014 | 20100216.RY.SU | RY.C7     | 2                    | 0.059                 | 0.002 |
| 20091229.RT.ST | RT.ST.C1  | RT.ST.C1             | 1.087                 | 0.076 | 20100216.RY.SU | RY.SU.C1  | RY.SU.C1             | 0.823                 | 0.036 |
| 20091229.RT.ST | RT.ST.C2  | RT.ST.C2             | 1.119                 | 0.102 | 20100216.RY.SU | RY.SU.C2  | RY.SU.C2             | 0.817                 | 0.045 |
| 20091229.RT.ST | RT.ST.C3  | RT.ST.C3             | 0.935                 | 0.104 | 20100216.RY.SU | RY.SU.C3  | RY.SU.C3             | 0.827                 | 0.039 |
| 20091229.RT.ST | RT.ST.C4  | RT.ST.C4             | 0.543                 | 0.076 | 20100216.RY.SU | RY.SU.C4  | RY.SU.C4             | 0.853                 | 0.033 |
| 20091229.RT.ST | RT.ST.C5  | RT.ST.C5             | 0.114                 | 0.027 | 20100216.RY.SU | RY.SU.C5  | RY.SU.C5             | 0.708                 | 0.096 |
| 20091229.RT.ST | RT.ST.C6  | RT.ST.C6             | 0.005                 | 0.001 | 20100216.RY.SU | RY.SU.C6  | RY.SU.C6             | 0.057                 | 0.071 |
| 20091229.RT.ST | RT.ST.C7  | RT.ST.C7             | -0.004                | 0.001 | 20100216.RY.SU | RY.SU.C7  | RY.SU.C7             | 0.044                 | 0.004 |
| 20091229.RT.ST | ST.C1     | 0.078125             | 1.014                 | 0.068 | 20100216.RY.SU | SU.C1     | 0.3125               | 1.171                 | 0.114 |
| 20091229.RT.ST | ST.C2     | 0.15625              | 0.998                 | 0.058 | 20100216.RY.SU | SU.C2     | 0.625                | 1.137                 | 0.118 |
| 20091229.RT.ST | ST.C3     | 0.3125               | 0.873                 | 0.026 | 20100216.RY.SU | SU.C3     | 1.25                 | 1.058                 | 0.041 |
| 20091229.RT.ST | ST.C4     | 0.625                | 0.595                 | 0.05  | 20100216.RY.SU | SU.C4     | 2.5                  | 0.818                 | 0.05  |
| 20091229.RT.ST | ST.C5     | 1.25                 | 0.277                 | 0.036 | 20100216.RY.SU | SU.C5     | 5                    | 0.605                 | 0.059 |
| 20091229.RT.ST | ST.C6     | 2.5                  | 0.011                 | 0.012 | 20100216.RY.SU | SU.C6     | 10                   | 0.575                 | 0.026 |
| 20091229.RT.ST | ST.C7     | 5                    | -0.001                | 0.002 | 20100216.RY.SU | SU.C7     | 20                   | 0.316                 | 0.025 |
| 20091229.RT.SU | RT.C1     | 0.078125             | 1.083                 | 0.032 | 20100216.SR.SU | SR.C1     | 0.078125             | 1.15                  | 0.052 |
| 20091229.RT.SU | RT.C2     | 0.15625              | 1.05                  | 0.033 | 20100216.SR.SU | SR.C2     | 0.15625              | 1.164                 | 0.051 |
| 20091229.RT.SU | RT.C3     | 0.3125               | 0.979                 | 0.079 | 20100216.SR.SU | SR.C3     | 0.3125               | 1.137                 | 0.056 |
| 20091229.RT.SU | RT.C4     | 0.625                | 1.012                 | 0.095 | 20100216.SR.SU | SR.C4     | 0.625                | 1.172                 | 0.083 |
| 20091229.RT.SU | RT.C5     | 1.25                 | 0.756                 | 0.054 | 20100216.SR.SU | SR.C5     | 1.25                 | 1.108                 | 0.066 |
| 20091229.RT.SU | RT.C6     | 2.5                  | 0.327                 | 0.049 | 20100216.SR.SU | SR.C6     | 2.5                  | 1.166                 | 0.057 |
| 20091229.RT.SU | RT.C7     | 5                    | 0.164                 | 0.014 | 20100216.SR.SU | SR.C7     | 5                    | 1.019                 | 0.059 |
| 20091229.RT.SU | RT.SU.C1  | RT.SU.C1             | 1.198                 | 0.1   | 20100216.SR.SU | SR.SU.C1  | SR.SU.C1             | 1.033                 | 0.027 |
| 20091229.RT.SU | RT.SU.C2  | RT.SU.C2             | 1.091                 | 0.091 | 20100216.SR.SU | SR.SU.C2  | SR.SU.C2             | 1.093                 | 0.061 |
| 20091229.RT.SU | RT.SU.C3  | RT.SU.C3             | 1.103                 | 0.111 | 20100216.SR.SU | SR.SU.C3  | SR.SU.C3             | 1.084                 | 0.035 |
| 20091229.RT.SU | RT.SU.C4  | RT.SU.C4             | 0.94                  | 0.128 | 20100216.SR.SU | SR.SU.C4  | SR.SU.C4             | 0.979                 | 0.022 |
| 20091229.RT.SU | RT.SU.C5  | RT.SU.C5             | 0.315                 | 0.069 | 20100216.SR.SU | SR.SU.C5  | SR.SU.C5             | 0.689                 | 0.036 |
| 20091229.RT.SU | RT.SU.C6  | RT.SU.C6             | 0.155                 | 0.029 | 20100216.SR.SU | SR.SU.C6  | SR.SU.C6             | 0.512                 | 0.018 |
| 20091229.RT.SU | RT.SU.C7  | RT.SU.C7             | 0.068                 | 0.015 | 20100216.SR.SU | SR.SU.C7  | SR.SU.C7             | 0.328                 | 0.019 |
| 20091229.RT.SU | SU.C1     | 0.3125               | 1.095                 | 0.065 | 20100216.SR.SU | SU.C1     | 0.3125               | 1.171                 | 0.114 |
| 20091229.RT.SU | SU.C2     | 0.625                | 1.083                 | 0.079 | 20100216.SR.SU | SU.C2     | 0.625                | 1.137                 | 0.118 |
| 20091229.RT.SU | SU.C3     | 1.25                 | 1.092                 | 0.089 | 20100216.SR.SU | SU.C3     | 1.25                 | 1.058                 | 0.041 |
| 20091229.RT.SU | SU.C4     | 2.5                  | 0.926                 | 0.081 | 20100216.SR.SU | SU.C4     | 2.5                  | 0.818                 | 0.05  |
| 20091229.RT.SU | SU.C5     | 5                    | 0.721                 | 0.096 | 20100216.SR.SU | SU.C5     | 5                    | 0.605                 | 0.059 |
| 20091229.RT.SU | SU.C6     | 10                   | 0.568                 | 0.066 | 20100216.SR.SU | SU.C6     | 10                   | 0.575                 | 0.026 |
| 20091229.RT.SU | SU.C7     | 20                   | 0.482                 | 0.085 | 20100216.SR.SU | SU.C7     | 20                   | 0.316                 | 0.025 |
| 20091229.ST.SU | ST.C1     | 0.078125             | 1.014                 | 0.068 | 20100223.AK.ST | AK.C1     | 0.3125               | 0.854                 | 0.096 |
| 20091229.ST.SU | ST.C2     | 0.15625              | 0.998                 | 0.058 | 20100223.AK.ST | AK.C2     | 0.625                | 0.859                 | 0.038 |
| 20091229.ST.SU | ST.C3     | 0.3125               | 0.873                 | 0.026 | 20100223.AK.ST | AK.C3     | 1.25                 | 0.839                 | 0.028 |
| 20091229.ST.SU | ST.C4     | 0.625                | 0.595                 | 0.05  | 20100223.AK.ST | AK.C4     | 2.5                  | 0.831                 | 0.046 |
| 20091229.ST.SU | ST.C5     | 1.25                 | 0.277                 | 0.036 | 20100223.AK.ST | AK.C5     | 5                    | 0.703                 | 0.052 |
| 20091229.ST.SU | ST.C6     | 2.5                  | 0.011                 | 0.012 | 20100223.AK.ST | AK.C6     | 10                   | 0.376                 | 0.024 |
| 20091229.ST.SU | ST.C7     | 5                    | -0.001                | 0.002 | 20100223.AK.ST | AK.C7     | 20                   | 0.217                 | 0.015 |
| 20091229.ST.SU | ST.SU.C1  | ST.SU.C1             | 0.972                 | 0.07  | 20100223.AK.ST | AK.ST.C1  | AK.ST.C1             | 1.032                 | 0.055 |
| 20091229.ST.SU | ST.SU.C2  | ST.SU.C2             | 1.052                 | 0.05  | 20100223.AK.ST | AK.ST.C2  | AK.ST.C2             | 0.931                 | 0.061 |
| 20091229.ST.SU | ST.SU.C3  | ST.SU.C3             | 0.867                 | 0.054 | 20100223.AK.ST | AK.ST.C3  | AK.ST.C3             | 0.64                  | 0.07  |
| 20091229.ST.SU | ST.SU.C4  | ST.SU.C4             | 0.637                 | 0.047 | 20100223.AK.ST | AK.ST.C4  | AK.ST.C4             | 0.393                 | 0.03  |
| 20091229.ST.SU | ST.SU.C5  | ST.SU.C5             | 0.152                 | 0.018 | 20100223.AK.ST | AK.ST.C5  | AK.ST.C5             | 0.029                 | 0.007 |
| 20091229.ST.SU | ST.SU.C6  | ST.SU.C6             | 0.014                 | 0.001 | 20100223.AK.ST | AK.ST.C6  | AK.ST.C6             | 0.006                 | 0.002 |
| 20091229.ST.SU | ST.SU.C7  | ST.SU.C7             | 0.01                  | 0.001 | 20100223.AK.ST | AK.ST.C7  | AK.ST.C7             | -0.007                | 0.005 |
| 20091229.ST.SU | SU.C1     | 0.3125               | 1.095                 | 0.065 | 20100223.AK.ST | ST.C1     | 0.078125             | 0.629                 | 0.082 |
| 20091229.ST.SU | SU.C2     | 0.625                | 1.083                 | 0.079 | 20100223.AK.ST | ST.C2     | 0.15625              | 0.752                 | 0.062 |
| 20091229.ST.SU | SU.C3     | 1.25                 | 1.092                 | 0.089 | 20100223.AK.ST | ST.C3     | 0.3125               | 0.417                 | 0.028 |
| 20091229.ST.SU | SU.C4     | 2.5                  | 0.926                 | 0.081 | 20100223.AK.ST | ST.C4     | 0.625                | 0.306                 | 0.023 |
| 20091229.ST.SU | SU.C5     | 5                    | 0.721                 | 0.096 | 20100223.AK.ST | ST.C5     | 1.25                 | 0.036                 | 0.007 |
| 20091229.ST.SU | SU.C6     | 10                   | 0.568                 | 0.066 | 20100223.AK.ST | ST.C6     | 2.5                  | 0.01                  | 0.001 |
| 20091229.ST.SU | SU.C7     | 20                   | 0.482                 | 0.085 | 20100223.AK.ST | ST.C7     | 5                    | 0.008                 | 0.001 |
| 20100126.GF.SL | GF.C1     | 0.3125               | 1.068                 | 0.043 | 20100223.ER.RY | ER.C1     | 0.078125             | 1.037                 | 0.025 |
| 20100126.GF.SL | GF.C2     | 0.625                | 1.123                 | 0.073 | 20100223.ER.RY | ER.C2     | 0.15625              | 1.1                   | 0.05  |
| 20100126.GF.SL | GF.C3     | 1.25                 | 1.108                 | 0.043 | 20100223.ER.RY | ER.C3     | 0.3125               | 0.984                 | 0.062 |
| 20100126.GF.SL | GF.C4     | 2.5                  | 1.003                 | 0.1   | 20100223.ER.RY | ER.C4     | 0.625                | 0.971                 | 0.097 |

Table S2 continued

| Experiment     | Condition | Drug Dose ( $\mu$ M) | Effect (rel. to DMSO) | STD   | Experiment     | Condition | Drug Dose ( $\mu$ M) | Effect (rel. to DMSO) | STD   |
|----------------|-----------|----------------------|-----------------------|-------|----------------|-----------|----------------------|-----------------------|-------|
| 20100126.GF.SL | GF.C5     | 5                    | 0.926                 | 0.062 | 20100223.ER.RY | ER.C5     | 1.25                 | 0.952                 | 0.105 |
| 20100126.GF.SL | GF.C6     | 10                   | 0.759                 | 0.09  | 20100223.ER.RY | ER.C6     | 2.5                  | 0.845                 | 0.106 |
| 20100126.GF.SL | GF.C7     | 20                   | 0.391                 | 0.089 | 20100223.ER.RY | ER.C7     | 5                    | 0.922                 | 0.056 |
| 20100126.GF.SL | GF.SL.C1  | GF.SL.C1             | 1.005                 | 0.04  | 20100223.ER.RY | ER.RY.C1  | ER.RY.C1             | 1.177                 | 0.139 |
| 20100126.GF.SL | GF.SL.C2  | GF.SL.C2             | 1.008                 | 0.046 | 20100223.ER.RY | ER.RY.C2  | ER.RY.C2             | 1.046                 | 0.114 |
| 20100126.GF.SL | GF.SL.C3  | GF.SL.C3             | 0.949                 | 0.04  | 20100223.ER.RY | ER.RY.C3  | ER.RY.C3             | 1.266                 | 0.037 |
| 20100126.GF.SL | GF.SL.C4  | GF.SL.C4             | 0.946                 | 0.07  | 20100223.ER.RY | ER.RY.C4  | ER.RY.C4             | 1.29                  | 0.019 |
| 20100126.GF.SL | GF.SL.C5  | GF.SL.C5             | 0.881                 | 0.035 | 20100223.ER.RY | ER.RY.C5  | ER.RY.C5             | 1.282                 | 0.036 |
| 20100126.GF.SL | GF.SL.C6  | GF.SL.C6             | 0.677                 | 0.012 | 20100223.ER.RY | ER.RY.C6  | ER.RY.C6             | 0.765                 | 0.037 |
| 20100126.GF.SL | GF.SL.C7  | GF.SL.C7             | 0.341                 | 0.034 | 20100223.ER.RY | ER.RY.C7  | ER.RY.C7             | 0.067                 | 0.008 |
| 20100126.GF.SL | SL.C1     | 0.078125             | 1.023                 | 0.014 | 20100223.ER.RY | RY.C1     | 0.03125              | 1.021                 | 0.105 |
| 20100126.GF.SL | SL.C2     | 0.15625              | 1.047                 | 0.037 | 20100223.ER.RY | RY.C2     | 0.0625               | 1.051                 | 0.067 |
| 20100126.GF.SL | SL.C3     | 0.3125               | 1.047                 | 0.072 | 20100223.ER.RY | RY.C3     | 0.125                | 1.113                 | 0.045 |
| 20100126.GF.SL | SL.C4     | 0.625                | 1.071                 | 0.101 | 20100223.ER.RY | RY.C4     | 0.25                 | 1.192                 | 0.068 |
| 20100126.GF.SL | SL.C5     | 1.25                 | 1.035                 | 0.045 | 20100223.ER.RY | RY.C5     | 0.5                  | 1.216                 | 0.049 |
| 20100126.GF.SL | SL.C6     | 2.5                  | 0.997                 | 0.039 | 20100223.ER.RY | RY.C6     | 1                    | 0.746                 | 0.058 |
| 20100126.GF.SL | SL.C7     | 5                    | 0.977                 | 0.023 | 20100223.ER.RY | RY.C7     | 2                    | 0.065                 | 0.005 |
| 20100126.GF.SR | GF.C1     | 0.3125               | 1.068                 | 0.043 | 20100223.ER.ST | ER.C1     | 0.078125             | 1.037                 | 0.025 |
| 20100126.GF.SR | GF.C2     | 0.625                | 1.123                 | 0.073 | 20100223.ER.ST | ER.C2     | 0.15625              | 1.1                   | 0.05  |
| 20100126.GF.SR | GF.C3     | 1.25                 | 1.108                 | 0.043 | 20100223.ER.ST | ER.C3     | 0.3125               | 0.984                 | 0.062 |
| 20100126.GF.SR | GF.C4     | 2.5                  | 1.003                 | 0.1   | 20100223.ER.ST | ER.C4     | 0.625                | 0.971                 | 0.097 |
| 20100126.GF.SR | GF.C5     | 5                    | 0.926                 | 0.062 | 20100223.ER.ST | ER.C5     | 1.25                 | 0.952                 | 0.105 |
| 20100126.GF.SR | GF.C6     | 10                   | 0.759                 | 0.09  | 20100223.ER.ST | ER.C6     | 2.5                  | 0.845                 | 0.106 |
| 20100126.GF.SR | GF.C7     | 20                   | 0.391                 | 0.089 | 20100223.ER.ST | ER.C7     | 5                    | 0.922                 | 0.056 |
| 20100126.GF.SR | GF.SR.C1  | GF.SR.C1             | 1.043                 | 0.031 | 20100223.ER.ST | ER.ST.C1  | ER.ST.C1             | 1.109                 | 0.053 |
| 20100126.GF.SR | GF.SR.C2  | GF.SR.C2             | 0.978                 | 0.063 | 20100223.ER.ST | ER.ST.C2  | ER.ST.C2             | 1.056                 | 0.066 |
| 20100126.GF.SR | GF.SR.C3  | GF.SR.C3             | 0.986                 | 0.053 | 20100223.ER.ST | ER.ST.C3  | ER.ST.C3             | 0.681                 | 0.065 |
| 20100126.GF.SR | GF.SR.C4  | GF.SR.C4             | 1.004                 | 0.074 | 20100223.ER.ST | ER.ST.C4  | ER.ST.C4             | 0.325                 | 0.034 |
| 20100126.GF.SR | GF.SR.C5  | GF.SR.C5             | 0.95                  | 0.051 | 20100223.ER.ST | ER.ST.C5  | ER.ST.C5             | 0.053                 | 0.027 |
| 20100126.GF.SR | GF.SR.C6  | GF.SR.C6             | 0.741                 | 0.075 | 20100223.ER.ST | ER.ST.C6  | ER.ST.C6             | 0.007                 | 0.001 |
| 20100126.GF.SR | GF.SR.C7  | GF.SR.C7             | 0.24                  | 0.035 | 20100223.ER.ST | ER.ST.C7  | ER.ST.C7             | 0.005                 | 0.004 |
| 20100126.GF.SR | SR.C1     | 0.078125             | 1.039                 | 0.031 | 20100223.ER.ST | ST.C1     | 0.078125             | 0.629                 | 0.082 |
| 20100126.GF.SR | SR.C2     | 0.15625              | 1.027                 | 0.038 | 20100223.ER.ST | ST.C2     | 0.15625              | 0.752                 | 0.062 |
| 20100126.GF.SR | SR.C3     | 0.3125               | 1.003                 | 0.069 | 20100223.ER.ST | ST.C3     | 0.3125               | 0.417                 | 0.028 |
| 20100126.GF.SR | SR.C4     | 0.625                | 1.045                 | 0.083 | 20100223.ER.ST | ST.C4     | 0.625                | 0.306                 | 0.023 |
| 20100126.GF.SR | SR.C5     | 1.25                 | 0.859                 | 0.048 | 20100223.ER.ST | ST.C5     | 1.25                 | 0.036                 | 0.007 |
| 20100126.GF.SR | SR.C6     | 2.5                  | 1.056                 | 0.077 | 20100223.ER.ST | ST.C6     | 2.5                  | 0.01                  | 0.001 |
| 20100126.GF.SR | SR.C7     | 5                    | 1.069                 | 0.053 | 20100223.ER.ST | ST.C7     | 5                    | 0.008                 | 0.001 |
| 20100126.GF.ST | GF.C1     | 0.3125               | 1.068                 | 0.043 | 20100223.GF.PD | GFC1      | 0.3125               | 0.922                 | 0.063 |
| 20100126.GF.ST | GF.C2     | 0.625                | 1.123                 | 0.073 | 20100223.GF.PD | GFC2      | 0.625                | 0.97                  | 0.067 |
| 20100126.GF.ST | GF.C3     | 1.25                 | 1.108                 | 0.043 | 20100223.GF.PD | GFC3      | 1.25                 | 0.964                 | 0.106 |
| 20100126.GF.ST | GF.C4     | 2.5                  | 1.003                 | 0.1   | 20100223.GF.PD | GFC4      | 2.5                  | 0.969                 | 0.044 |
| 20100126.GF.ST | GF.C5     | 5                    | 0.926                 | 0.062 | 20100223.GF.PD | GFC5      | 5                    | 0.846                 | 0.063 |
| 20100126.GF.ST | GF.C6     | 10                   | 0.759                 | 0.09  | 20100223.GF.PD | GFC6      | 10                   | 0.525                 | 0.063 |
| 20100126.GF.ST | GF.C7     | 20                   | 0.391                 | 0.089 | 20100223.GF.PD | GFC7      | 20                   | 0.221                 | 0.03  |
| 20100126.GF.ST | GF.ST.C1  | GF.ST.C1             | 1.048                 | 0.033 | 20100223.GF.PD | GF.PD.C1  | GF.PD.C1             | 0.787                 | 0.081 |
| 20100126.GF.ST | GF.ST.C2  | GF.ST.C2             | 1.001                 | 0.041 | 20100223.GF.PD | GF.PD.C2  | GF.PD.C2             | 0.756                 | 0.078 |
| 20100126.GF.ST | GF.ST.C3  | GF.ST.C3             | 0.875                 | 0.085 | 20100223.GF.PD | GF.PD.C3  | GF.PD.C3             | 0.736                 | 0.08  |
| 20100126.GF.ST | GF.ST.C4  | GF.ST.C4             | 0.44                  | 0.04  | 20100223.GF.PD | GF.PD.C4  | GF.PD.C4             | 0.619                 | 0.058 |
| 20100126.GF.ST | GF.ST.C5  | GF.ST.C5             | 0.236                 | 0.031 | 20100223.GF.PD | GF.PD.C5  | GF.PD.C5             | 0.433                 | 0.031 |
| 20100126.GF.ST | GF.ST.C6  | GF.ST.C6             | 0.01                  | 0.001 | 20100223.GF.PD | GF.PD.C6  | GF.PD.C6             | 0.209                 | 0.022 |
| 20100126.GF.ST | GF.ST.C7  | GF.ST.C7             | 0                     | 0     | 20100223.GF.PD | GF.PD.C7  | GF.PD.C7             | 0.097                 | 0.009 |
| 20100126.GF.ST | ST.C1     | 0.078125             | 1.215                 | 0.079 | 20100223.GF.PD | PD.C1     | 0.15625              | 1.02                  | 0.039 |
| 20100126.GF.ST | ST.C2     | 0.15625              | 1.221                 | 0.103 | 20100223.GF.PD | PD.C2     | 0.3125               | 0.989                 | 0.033 |
| 20100126.GF.ST | ST.C3     | 0.3125               | 0.97                  | 0.125 | 20100223.GF.PD | PD.C3     | 0.625                | 0.974                 | 0.085 |
| 20100126.GF.ST | ST.C4     | 0.625                | 0.514                 | 0.139 | 20100223.GF.PD | PD.C4     | 1.25                 | 0.771                 | 0.065 |
| 20100126.GF.ST | ST.C5     | 1.25                 | 0.429                 | 0.132 | 20100223.GF.PD | PD.C5     | 2.5                  | 0.587                 | 0.028 |
| 20100126.GF.ST | ST.C6     | 2.5                  | 0.017                 | 0.007 | 20100223.GF.PD | PD.C6     | 5                    | 0.371                 | 0.024 |
| 20100126.GF.ST | ST.C7     | 5                    | 0.001                 | 0.001 | 20100223.GF.PD | PD.C7     | 10                   | 0.225                 | 0.023 |
| 20100126.SL.SR | SL.C1     | 0.078125             | 1.023                 | 0.014 | 20100223.GF.RY | GFC1      | 0.3125               | 0.922                 | 0.063 |
| 20100126.SL.SR | SL.C2     | 0.15625              | 1.047                 | 0.037 | 20100223.GF.RY | GFC2      | 0.625                | 0.97                  | 0.067 |
| 20100126.SL.SR | SL.C3     | 0.3125               | 1.047                 | 0.072 | 20100223.GF.RY | GFC3      | 1.25                 | 0.964                 | 0.106 |
| 20100126.SL.SR | SL.C4     | 0.625                | 1.071                 | 0.101 | 20100223.GF.RY | GFC4      | 2.5                  | 0.969                 | 0.044 |
| 20100126.SL.SR | SL.C5     | 1.25                 | 1.035                 | 0.045 | 20100223.GF.RY | GFC5      | 5                    | 0.846                 | 0.063 |
| 20100126.SL.SR | SL.C6     | 2.5                  | 0.997                 | 0.039 | 20100223.GF.RY | GFC6      | 10                   | 0.525                 | 0.063 |
| 20100126.SL.SR | SL.C7     | 5                    | 0.977                 | 0.023 | 20100223.GF.RY | GFC7      | 20                   | 0.221                 | 0.03  |
| 20100126.SL.SR | SL.SR.C1  | SL.SR.C1             | 1.037                 | 0.036 | 20100223.GF.RY | GF.RY.C1  | GF.RY.C1             | 0.964                 | 0.04  |
| 20100126.SL.SR | SL.SR.C2  | SL.SR.C2             | 1.031                 | 0.052 | 20100223.GF.RY | GF.RY.C2  | GF.RY.C2             | 0.934                 | 0.03  |
| 20100126.SL.SR | SL.SR.C3  | SL.SR.C3             | 1.054                 | 0.061 | 20100223.GF.RY | GF.RY.C3  | GF.RY.C3             | 0.92                  | 0.046 |

Table S2 continued

| Experiment     | Condition | Drug Dose ( $\mu$ M) | Effect (rel. to DMSO) | STD   | Experiment     | Condition | Drug Dose ( $\mu$ M) | Effect (rel. to DMSO) | STD   |
|----------------|-----------|----------------------|-----------------------|-------|----------------|-----------|----------------------|-----------------------|-------|
| 20100126.SL.SR | SL.SR.C4  | SL.SR.C4             | 1.046                 | 0.031 | 20100223.GFRY  | GFRY.C4   | GFRY.C4              | 0.958                 | 0.039 |
| 20100126.SL.SR | SL.SR.C5  | SL.SR.C5             | 1.043                 | 0.028 | 20100223.GFRY  | GFRY.C5   | GFRY.C5              | 0.633                 | 0.036 |
| 20100126.SL.SR | SL.SR.C6  | SL.SR.C6             | 1.017                 | 0.048 | 20100223.GFRY  | GFRY.C6   | GFRY.C6              | 0.236                 | 0.046 |
| 20100126.SL.SR | SL.SR.C7  | SL.SR.C7             | 0.992                 | 0.033 | 20100223.GFRY  | GFRY.C7   | GFRY.C7              | 0.033                 | 0.004 |
| 20100126.SL.SR | SR.C1     | 0.078125             | 1.039                 | 0.031 | 20100223.GFRY  | RY.C1     | 0.03125              | 1.021                 | 0.105 |
| 20100126.SL.SR | SR.C2     | 0.15625              | 1.027                 | 0.038 | 20100223.GFRY  | RY.C2     | 0.0625               | 1.051                 | 0.067 |
| 20100126.SL.SR | SR.C3     | 0.3125               | 1.003                 | 0.069 | 20100223.GFRY  | RY.C3     | 0.125                | 1.113                 | 0.045 |
| 20100126.SL.SR | SR.C4     | 0.625                | 1.045                 | 0.083 | 20100223.GFRY  | RY.C4     | 0.25                 | 1.192                 | 0.068 |
| 20100126.SL.SR | SR.C5     | 1.25                 | 0.859                 | 0.048 | 20100223.GFRY  | RY.C5     | 0.5                  | 1.216                 | 0.049 |
| 20100126.SL.SR | SR.C6     | 2.5                  | 1.056                 | 0.077 | 20100223.GFRY  | RY.C6     | 1                    | 0.746                 | 0.058 |
| 20100126.SL.SR | SR.C7     | 5                    | 1.069                 | 0.053 | 20100223.GFRY  | RY.C7     | 2                    | 0.065                 | 0.005 |
| 20100126.SL.ST | SL.C1     | 0.078125             | 1.023                 | 0.014 | 20100223.GFSU  | GFC1      | 0.3125               | 0.922                 | 0.063 |
| 20100126.SL.ST | SL.C2     | 0.15625              | 1.047                 | 0.037 | 20100223.GFSU  | GFC2      | 0.625                | 0.97                  | 0.067 |
| 20100126.SL.ST | SL.C3     | 0.3125               | 1.047                 | 0.072 | 20100223.GFSU  | GFC3      | 1.25                 | 0.964                 | 0.106 |
| 20100126.SL.ST | SL.C4     | 0.625                | 1.071                 | 0.101 | 20100223.GFSU  | GFC4      | 2.5                  | 0.969                 | 0.044 |
| 20100126.SL.ST | SL.C5     | 1.25                 | 1.035                 | 0.045 | 20100223.GFSU  | GFC5      | 5                    | 0.846                 | 0.063 |
| 20100126.SL.ST | SL.C6     | 2.5                  | 0.997                 | 0.039 | 20100223.GFSU  | GFC6      | 10                   | 0.525                 | 0.063 |
| 20100126.SL.ST | SL.C7     | 5                    | 0.977                 | 0.023 | 20100223.GFSU  | GFC7      | 20                   | 0.221                 | 0.03  |
| 20100126.SL.ST | SL.ST.C1  | SL.ST.C1             | 1.099                 | 0.017 | 20100223.GFSU  | GFSU.C1   | GFSU.C1              | 1.085                 | 0.067 |
| 20100126.SL.ST | SL.ST.C2  | SL.ST.C2             | 1.104                 | 0.028 | 20100223.GFSU  | GFSU.C2   | GFSU.C2              | 1.024                 | 0.062 |
| 20100126.SL.ST | SL.ST.C3  | SL.ST.C3             | 0.954                 | 0.063 | 20100223.GFSU  | GFSU.C3   | GFSU.C3              | 0.908                 | 0.033 |
| 20100126.SL.ST | SL.ST.C4  | SL.ST.C4             | 0.524                 | 0.035 | 20100223.GFSU  | GFSU.C4   | GFSU.C4              | 0.579                 | 0.021 |
| 20100126.SL.ST | SL.ST.C5  | SL.ST.C5             | 0.351                 | 0.054 | 20100223.GFSU  | GFSU.C5   | GFSU.C5              | 0.356                 | 0.028 |
| 20100126.SL.ST | SL.ST.C6  | SL.ST.C6             | 0.018                 | 0.006 | 20100223.GFSU  | GFSU.C6   | GFSU.C6              | 0.207                 | 0.017 |
| 20100126.SL.ST | SL.ST.C7  | SL.ST.C7             | -0.001                | 0.001 | 20100223.GFSU  | GFSU.C7   | GFSU.C7              | 0.095                 | 0.008 |
| 20100126.SL.ST | ST.C1     | 0.078125             | 1.215                 | 0.079 | 20100223.GFSU  | SU.C1     | 0.3125               | 1.026                 | 0.036 |
| 20100126.SL.ST | ST.C2     | 0.15625              | 1.221                 | 0.103 | 20100223.GFSU  | SU.C2     | 0.625                | 1.059                 | 0.039 |
| 20100126.SL.ST | ST.C3     | 0.3125               | 0.97                  | 0.125 | 20100223.GFSU  | SU.C3     | 1.25                 | 1.012                 | 0.077 |
| 20100126.SL.ST | ST.C4     | 0.625                | 0.514                 | 0.139 | 20100223.GFSU  | SU.C4     | 2.5                  | 0.781                 | 0.048 |
| 20100126.SL.ST | ST.C5     | 1.25                 | 0.429                 | 0.132 | 20100223.GFSU  | SU.C5     | 5                    | 0.549                 | 0.033 |
| 20100126.SL.ST | ST.C6     | 2.5                  | 0.017                 | 0.007 | 20100223.GFSU  | SU.C6     | 10                   | 0.468                 | 0.029 |
| 20100126.SL.ST | ST.C7     | 5                    | 0.001                 | 0.001 | 20100223.GFSU  | SU.C7     | 20                   | 0.334                 | 0.02  |
| 20100126.SR.ST | SR.C1     | 0.078125             | 1.039                 | 0.031 | 20100223.HN.RY | HN.C1     | 0.3125               | 1.106                 | 0.026 |
| 20100126.SR.ST | SR.C2     | 0.15625              | 1.027                 | 0.038 | 20100223.HN.RY | HN.C2     | 0.625                | 1.088                 | 0.053 |
| 20100126.SR.ST | SR.C3     | 0.3125               | 1.003                 | 0.069 | 20100223.HN.RY | HN.C3     | 1.25                 | 1.016                 | 0.099 |
| 20100126.SR.ST | SR.C4     | 0.625                | 1.045                 | 0.083 | 20100223.HN.RY | HN.C4     | 2.5                  | 0.78                  | 0.086 |
| 20100126.SR.ST | SR.C5     | 1.25                 | 0.859                 | 0.048 | 20100223.HN.RY | HN.C5     | 5                    | 0.582                 | 0.026 |
| 20100126.SR.ST | SR.C6     | 2.5                  | 1.056                 | 0.077 | 20100223.HN.RY | HN.C6     | 10                   | 0.214                 | 0.034 |
| 20100126.SR.ST | SR.C7     | 5                    | 1.069                 | 0.053 | 20100223.HN.RY | HN.C7     | 20                   | 0.018                 | 0.003 |
| 20100126.SR.ST | SR.ST.C1  | SR.ST.C1             | 1.029                 | 0.041 | 20100223.HN.RY | HN.RY.C1  | HN.RY.C1             | 1.152                 | 0.062 |
| 20100126.SR.ST | SR.ST.C2  | SR.ST.C2             | 1.012                 | 0.041 | 20100223.HN.RY | HN.RY.C2  | HN.RY.C2             | 1.098                 | 0.088 |
| 20100126.SR.ST | SR.ST.C3  | SR.ST.C3             | 0.911                 | 0.042 | 20100223.HN.RY | HN.RY.C3  | HN.RY.C3             | 1.055                 | 0.098 |
| 20100126.SR.ST | SR.ST.C4  | SR.ST.C4             | 0.52                  | 0.066 | 20100223.HN.RY | HN.RY.C4  | HN.RY.C4             | 0.749                 | 0.031 |
| 20100126.SR.ST | SR.ST.C5  | SR.ST.C5             | 0.343                 | 0.043 | 20100223.HN.RY | HN.RY.C5  | HN.RY.C5             | 0.421                 | 0.025 |
| 20100126.SR.ST | SR.ST.C6  | SR.ST.C6             | 0.024                 | 0.006 | 20100223.HN.RY | HN.RY.C6  | HN.RY.C6             | 0.104                 | 0.018 |
| 20100126.SR.ST | SR.ST.C7  | SR.ST.C7             | 0                     | 0.001 | 20100223.HN.RY | HN.RY.C7  | HN.RY.C7             | 0.052                 | 0.003 |
| 20100126.SR.ST | ST.C1     | 0.078125             | 1.215                 | 0.079 | 20100223.HN.RY | RY.C1     | 0.03125              | 1.021                 | 0.105 |
| 20100126.SR.ST | ST.C2     | 0.15625              | 1.221                 | 0.103 | 20100223.HN.RY | RY.C2     | 0.0625               | 1.051                 | 0.067 |
| 20100126.SR.ST | ST.C3     | 0.3125               | 0.97                  | 0.125 | 20100223.HN.RY | RY.C3     | 0.125                | 1.113                 | 0.045 |
| 20100126.SR.ST | ST.C4     | 0.625                | 0.514                 | 0.139 | 20100223.HN.RY | RY.C4     | 0.25                 | 1.192                 | 0.068 |
| 20100126.SR.ST | ST.C5     | 1.25                 | 0.429                 | 0.132 | 20100223.HN.RY | RY.C5     | 0.5                  | 1.216                 | 0.049 |
| 20100126.SR.ST | ST.C6     | 2.5                  | 0.017                 | 0.007 | 20100223.HN.RY | RY.C6     | 1                    | 0.746                 | 0.058 |
| 20100126.SR.ST | ST.C7     | 5                    | 0.001                 | 0.001 | 20100223.HN.RY | RY.C7     | 2                    | 0.065                 | 0.005 |
| 20100129.ER.PD | ER.C1     | 0.078125             | 0.908                 | 0.078 | 20100223.PI.RY | PI.C1     | 0.0625               | 0.967                 | 0.061 |
| 20100129.ER.PD | ER.C2     | 0.15625              | 0.816                 | 0.039 | 20100223.PI.RY | PI.C2     | 0.125                | 0.898                 | 0.02  |
| 20100129.ER.PD | ER.C3     | 0.3125               | 0.859                 | 0.056 | 20100223.PI.RY | PI.C3     | 0.25                 | 0.811                 | 0.057 |
| 20100129.ER.PD | ER.C4     | 0.625                | 0.768                 | 0.06  | 20100223.PI.RY | PI.C4     | 0.5                  | 0.652                 | 0.07  |
| 20100129.ER.PD | ER.C5     | 1.25                 | 0.771                 | 0.065 | 20100223.PI.RY | PI.C5     | 1                    | 0.459                 | 0.039 |
| 20100129.ER.PD | ER.C6     | 2.5                  | 0.766                 | 0.115 | 20100223.PI.RY | PI.C6     | 2                    | 0.311                 | 0.03  |
| 20100129.ER.PD | ER.C7     | 5                    | 0.768                 | 0.093 | 20100223.PI.RY | PI.C7     | 4                    | 0.235                 | 0.022 |
| 20100129.ER.PD | ER.PD.C1  | ER.PD.C1             | 0.934                 | 0.067 | 20100223.PI.RY | PI.RY.C1  | PI.RY.C1             | 0.976                 | 0.031 |
| 20100129.ER.PD | ER.PD.C2  | ER.PD.C2             | 0.956                 | 0.11  | 20100223.PI.RY | PI.RY.C2  | PI.RY.C2             | 0.963                 | 0.031 |
| 20100129.ER.PD | ER.PD.C3  | ER.PD.C3             | 0.793                 | 0.09  | 20100223.PI.RY | PI.RY.C3  | PI.RY.C3             | 0.75                  | 0.064 |
| 20100129.ER.PD | ER.PD.C4  | ER.PD.C4             | 0.743                 | 0.07  | 20100223.PI.RY | PI.RY.C4  | PI.RY.C4             | 0.567                 | 0.029 |
| 20100129.ER.PD | ER.PD.C5  | ER.PD.C5             | 0.621                 | 0.053 | 20100223.PI.RY | PI.RY.C5  | PI.RY.C5             | 0.366                 | 0.024 |
| 20100129.ER.PD | ER.PD.C6  | ER.PD.C6             | 0.425                 | 0.103 | 20100223.PI.RY | PI.RY.C6  | PI.RY.C6             | 0.228                 | 0.01  |
| 20100129.ER.PD | ER.PD.C7  | ER.PD.C7             | 0.344                 | 0.015 | 20100223.PI.RY | PI.RY.C7  | PI.RY.C7             | 0.124                 | 0.022 |
| 20100129.ER.PD | PD.C1     | 0.15625              | 0.853                 | 0.069 | 20100223.PI.RY | RY.C1     | 0.03125              | 1.021                 | 0.105 |
| 20100129.ER.PD | PD.C2     | 0.3125               | 0.875                 | 0.05  | 20100223.PI.RY | RY.C2     | 0.0625               | 1.051                 | 0.067 |

Table S2 continued

| Experiment     | Condition | Drug Dose ( $\mu$ M) | Effect (rel. to DMSO) | STD   | Experiment     | Condition | Drug Dose ( $\mu$ M) | Effect (rel. to DMSO) | STD   |
|----------------|-----------|----------------------|-----------------------|-------|----------------|-----------|----------------------|-----------------------|-------|
| 20100129.ER.PD | PD.C3     | 0.625                | 0.709                 | 0.081 | 20100223.PI.RY | RY.C3     | 0.125                | 1.113                 | 0.045 |
| 20100129.ER.PD | PD.C4     | 1.25                 | 0.625                 | 0.046 | 20100223.PI.RY | RY.C4     | 0.25                 | 1.192                 | 0.068 |
| 20100129.ER.PD | PD.C5     | 2.5                  | 0.539                 | 0.092 | 20100223.PI.RY | RY.C5     | 0.5                  | 1.216                 | 0.049 |
| 20100129.ER.PD | PD.C6     | 5                    | 0.403                 | 0.081 | 20100223.PI.RY | RY.C6     | 1                    | 0.746                 | 0.058 |
| 20100129.ER.PD | PD.C7     | 10                   | 0.232                 | 0.022 | 20100223.PI.RY | RY.C7     | 2                    | 0.065                 | 0.005 |
| 20100129.ER.PI | ER.C1     | 0.078125             | 0.908                 | 0.078 | 20100223.PI.ST | PI.C1     | 0.0625               | 0.967                 | 0.061 |
| 20100129.ER.PI | ER.C2     | 0.15625              | 0.816                 | 0.039 | 20100223.PI.ST | PI.C2     | 0.125                | 0.898                 | 0.02  |
| 20100129.ER.PI | ER.C3     | 0.3125               | 0.859                 | 0.056 | 20100223.PI.ST | PI.C3     | 0.25                 | 0.811                 | 0.057 |
| 20100129.ER.PI | ER.C4     | 0.625                | 0.768                 | 0.06  | 20100223.PI.ST | PI.C4     | 0.5                  | 0.652                 | 0.07  |
| 20100129.ER.PI | ER.C5     | 1.25                 | 0.771                 | 0.065 | 20100223.PI.ST | PI.C5     | 1                    | 0.459                 | 0.039 |
| 20100129.ER.PI | ER.C6     | 2.5                  | 0.766                 | 0.115 | 20100223.PI.ST | PI.C6     | 2                    | 0.311                 | 0.03  |
| 20100129.ER.PI | ER.C7     | 5                    | 0.768                 | 0.093 | 20100223.PI.ST | PI.C7     | 4                    | 0.235                 | 0.022 |
| 20100129.ER.PI | ER.PI.C1  | ER.PI.C1             | 0.861                 | 0.043 | 20100223.PI.ST | PI.ST.C1  | PI.ST.C1             | 1.008                 | 0.062 |
| 20100129.ER.PI | ER.PI.C2  | ER.PI.C2             | 0.808                 | 0.041 | 20100223.PI.ST | PI.ST.C2  | PI.ST.C2             | 0.754                 | 0.055 |
| 20100129.ER.PI | ER.PI.C3  | ER.PI.C3             | 0.705                 | 0.079 | 20100223.PI.ST | PI.ST.C3  | PI.ST.C3             | 0.5                   | 0.047 |
| 20100129.ER.PI | ER.PI.C4  | ER.PI.C4             | 0.56                  | 0.065 | 20100223.PI.ST | PI.ST.C4  | PI.ST.C4             | 0.194                 | 0.012 |
| 20100129.ER.PI | ER.PI.C5  | ER.PI.C5             | 0.433                 | 0.037 | 20100223.PI.ST | PI.ST.C5  | PI.ST.C5             | 0.049                 | 0.013 |
| 20100129.ER.PI | ER.PI.C6  | ER.PI.C6             | 0.311                 | 0.019 | 20100223.PI.ST | PI.ST.C6  | PI.ST.C6             | 0.008                 | 0.002 |
| 20100129.ER.PI | ER.PI.C7  | ER.PI.C7             | 0.231                 | 0.008 | 20100223.PI.ST | PI.ST.C7  | PI.ST.C7             | 0.005                 | 0.001 |
| 20100129.ER.PI | PI.C1     | 0.0625               | 0.928                 | 0.037 | 20100223.PI.ST | ST.C1     | 0.078125             | 0.629                 | 0.082 |
| 20100129.ER.PI | PI.C2     | 0.125                | 0.753                 | 0.045 | 20100223.PI.ST | ST.C2     | 0.15625              | 0.752                 | 0.062 |
| 20100129.ER.PI | PI.C3     | 0.25                 | 0.687                 | 0.086 | 20100223.PI.ST | ST.C3     | 0.3125               | 0.417                 | 0.028 |
| 20100129.ER.PI | PI.C4     | 0.5                  | 0.544                 | 0.04  | 20100223.PI.ST | ST.C4     | 0.625                | 0.306                 | 0.023 |
| 20100129.ER.PI | PI.C5     | 1                    | 0.391                 | 0.045 | 20100223.PI.ST | ST.C5     | 1.25                 | 0.036                 | 0.007 |
| 20100129.ER.PI | PI.C6     | 2                    | 0.283                 | 0.042 | 20100223.PI.ST | ST.C6     | 2.5                  | 0.01                  | 0.001 |
| 20100129.ER.PI | PI.C7     | 4                    | 0.207                 | 0.009 | 20100223.PI.ST | ST.C7     | 5                    | 0.008                 | 0.001 |
| 20100129.PD.PI | PD.C1     | 0.15625              | 0.853                 | 0.069 | 20100226.AG.RT | AG.C1     | 0.078125             | 0.985                 | 0.113 |
| 20100129.PD.PI | PD.C2     | 0.3125               | 0.875                 | 0.05  | 20100226.AG.RT | AG.C2     | 0.15625              | 0.999                 | 0.073 |
| 20100129.PD.PI | PD.C3     | 0.625                | 0.709                 | 0.081 | 20100226.AG.RT | AG.C3     | 0.3125               | 1.018                 | 0.065 |
| 20100129.PD.PI | PD.C4     | 1.25                 | 0.625                 | 0.046 | 20100226.AG.RT | AG.C4     | 0.625                | 1.112                 | 0.08  |
| 20100129.PD.PI | PD.C5     | 2.5                  | 0.539                 | 0.092 | 20100226.AG.RT | AG.C5     | 1.25                 | 1.041                 | 0.048 |
| 20100129.PD.PI | PD.C6     | 5                    | 0.403                 | 0.081 | 20100226.AG.RT | AG.C6     | 2.5                  | 1.059                 | 0.09  |
| 20100129.PD.PI | PD.C7     | 10                   | 0.232                 | 0.022 | 20100226.AG.RT | AG.C7     | 5                    | 0.926                 | 0.078 |
| 20100129.PD.PI | PD.PI.C1  | PD.PI.C1             | 0.818                 | 0.05  | 20100226.AG.RT | AG.RT.C1  | AG.RT.C1             | 1.016                 | 0.125 |
| 20100129.PD.PI | PD.PI.C2  | PD.PI.C2             | 0.764                 | 0.062 | 20100226.AG.RT | AG.RT.C2  | AG.RT.C2             | 1.028                 | 0.093 |
| 20100129.PD.PI | PD.PI.C3  | PD.PI.C3             | 0.611                 | 0.086 | 20100226.AG.RT | AG.RT.C3  | AG.RT.C3             | 0.998                 | 0.139 |
| 20100129.PD.PI | PD.PI.C4  | PD.PI.C4             | 0.49                  | 0.031 | 20100226.AG.RT | AG.RT.C4  | AG.RT.C4             | 0.936                 | 0.083 |
| 20100129.PD.PI | PD.PI.C5  | PD.PI.C5             | 0.346                 | 0.035 | 20100226.AG.RT | AG.RT.C5  | AG.RT.C5             | 0.631                 | 0.055 |
| 20100129.PD.PI | PD.PI.C6  | PD.PI.C6             | 0.25                  | 0.034 | 20100226.AG.RT | AG.RT.C6  | AG.RT.C6             | 0.201                 | 0.015 |
| 20100129.PD.PI | PD.PI.C7  | PD.PI.C7             | 0.176                 | 0.019 | 20100226.AG.RT | AG.RT.C7  | AG.RT.C7             | 0.159                 | 0.013 |
| 20100129.PD.PI | PI.C1     | 0.0625               | 0.928                 | 0.037 | 20100226.AG.RT | RT.C1     | 0.078125             | 1.033                 | 0.136 |
| 20100129.PD.PI | PI.C2     | 0.125                | 0.753                 | 0.045 | 20100226.AG.RT | RT.C2     | 0.15625              | 1.01                  | 0.099 |
| 20100129.PD.PI | PI.C3     | 0.25                 | 0.687                 | 0.086 | 20100226.AG.RT | RT.C3     | 0.3125               | 0.965                 | 0.067 |
| 20100129.PD.PI | PI.C4     | 0.5                  | 0.544                 | 0.04  | 20100226.AG.RT | RT.C4     | 0.625                | 0.935                 | 0.105 |
| 20100129.PD.PI | PI.C5     | 1                    | 0.391                 | 0.045 | 20100226.AG.RT | RT.C5     | 1.25                 | 0.621                 | 0.064 |
| 20100129.PD.PI | PI.C6     | 2                    | 0.283                 | 0.042 | 20100226.AG.RT | RT.C6     | 2.5                  | 0.216                 | 0.022 |
| 20100129.PD.PI | PI.C7     | 4                    | 0.207                 | 0.009 | 20100226.AG.RT | RT.C7     | 5                    | 0.178                 | 0.011 |
| 20100202.AG.AK | AG.AK.C1  | AG.AK.C1             | 0.871                 | 0.08  | 20100226.PI.SL | PI.C1     | 0.0625               | 0.929                 | 0.147 |
| 20100202.AG.AK | AG.AK.C2  | AG.AK.C2             | 0.86                  | 0.064 | 20100226.PI.SL | PI.C2     | 0.125                | 1.002                 | 0.299 |
| 20100202.AG.AK | AG.AK.C3  | AG.AK.C3             | 0.863                 | 0.104 | 20100226.PI.SL | PI.C3     | 0.25                 | 0.896                 | 0.047 |
| 20100202.AG.AK | AG.AK.C4  | AG.AK.C4             | 0.843                 | 0.116 | 20100226.PI.SL | PI.C4     | 0.5                  | 0.708                 | 0.118 |
| 20100202.AG.AK | AG.AK.C5  | AG.AK.C5             | 0.713                 | 0.06  | 20100226.PI.SL | PI.C5     | 1                    | 0.618                 | 0.11  |
| 20100202.AG.AK | AG.AK.C6  | AG.AK.C6             | 0.406                 | 0.069 | 20100226.PI.SL | PI.C6     | 2                    | 0.42                  | 0.036 |
| 20100202.AG.AK | AG.AK.C7  | AG.AK.C7             | 0.27                  | 0.044 | 20100226.PI.SL | PI.C7     | 4                    | 0.333                 | 0.052 |
| 20100202.AG.AK | AG.C1     | 0.078125             | 1.027                 | 0.034 | 20100226.PI.SL | PI.SL.C1  | PI.SL.C1             | 0.901                 | 0.057 |
| 20100202.AG.AK | AG.C2     | 0.15625              | 1.053                 | 0.071 | 20100226.PI.SL | PI.SL.C2  | PI.SL.C2             | 0.876                 | 0.045 |
| 20100202.AG.AK | AG.C3     | 0.3125               | 1.052                 | 0.059 | 20100226.PI.SL | PI.SL.C3  | PI.SL.C3             | 0.812                 | 0.105 |
| 20100202.AG.AK | AG.C4     | 0.625                | 0.967                 | 0.03  | 20100226.PI.SL | PI.SL.C4  | PI.SL.C4             | 0.626                 | 0.04  |
| 20100202.AG.AK | AG.C5     | 1.25                 | 0.972                 | 0.046 | 20100226.PI.SL | PI.SL.C5  | PI.SL.C5             | 0.447                 | 0.02  |
| 20100202.AG.AK | AG.C6     | 2.5                  | 0.955                 | 0.082 | 20100226.PI.SL | PI.SL.C6  | PI.SL.C6             | 0.285                 | 0.022 |
| 20100202.AG.AK | AG.C7     | 5                    | 0.861                 | 0.051 | 20100226.PI.SL | PI.SL.C7  | PI.SL.C7             | 0.222                 | 0.025 |
| 20100202.AG.AK | AK.C1     | 0.3125               | 0.983                 | 0.036 | 20100226.PI.SL | SL.C1     | 0.078125             | 1.082                 | 0.018 |
| 20100202.AG.AK | AK.C2     | 0.625                | 0.895                 | 0.056 | 20100226.PI.SL | SL.C2     | 0.15625              | 0.961                 | 0.058 |
| 20100202.AG.AK | AK.C3     | 1.25                 | 0.887                 | 0.081 | 20100226.PI.SL | SL.C3     | 0.3125               | 0.992                 | 0.067 |
| 20100202.AG.AK | AK.C4     | 2.5                  | 0.785                 | 0.072 | 20100226.PI.SL | SL.C4     | 0.625                | 1.054                 | 0.048 |
| 20100202.AG.AK | AK.C5     | 5                    | 0.587                 | 0.034 | 20100226.PI.SL | SL.C5     | 1.25                 | 1.038                 | 0.092 |
| 20100202.AG.AK | AK.C6     | 10                   | 0.399                 | 0.04  | 20100226.PI.SL | SL.C6     | 2.5                  | 1.065                 | 0.06  |
| 20100202.AG.AK | AK.C7     | 20                   | 0.277                 | 0.034 | 20100226.PI.SL | SL.C7     | 5                    | 1.01                  | 0.074 |
| 20100202.AG.ER | AG.C1     | 0.078125             | 1.027                 | 0.034 | 20100226.RT.SR | RT.C1     | 0.078125             | 1.033                 | 0.136 |

Table S2 continued

| Experiment     | Condition | Drug Dose<br>( $\mu$ M) | Effect<br>(rel. to DMSO) | STD   | Experiment     | Condition | Drug Dose<br>( $\mu$ M) | Effect<br>(rel. to DMSO) | STD   |
|----------------|-----------|-------------------------|--------------------------|-------|----------------|-----------|-------------------------|--------------------------|-------|
| 20100202.AG.ER | AG.C2     | 0.15625                 | 1.053                    | 0.071 | 20100226.RT.SR | RT.C2     | 0.15625                 | 1.01                     | 0.099 |
| 20100202.AG.ER | AG.C3     | 0.3125                  | 1.052                    | 0.059 | 20100226.RT.SR | RT.C3     | 0.3125                  | 0.965                    | 0.067 |
| 20100202.AG.ER | AG.C4     | 0.625                   | 0.967                    | 0.03  | 20100226.RT.SR | RT.C4     | 0.625                   | 0.935                    | 0.105 |
| 20100202.AG.ER | AG.C5     | 1.25                    | 0.972                    | 0.046 | 20100226.RT.SR | RT.C5     | 1.25                    | 0.621                    | 0.064 |
| 20100202.AG.ER | AG.C6     | 2.5                     | 0.955                    | 0.082 | 20100226.RT.SR | RT.C6     | 2.5                     | 0.216                    | 0.022 |
| 20100202.AG.ER | AG.C7     | 5                       | 0.861                    | 0.051 | 20100226.RT.SR | RT.C7     | 5                       | 0.178                    | 0.011 |
| 20100202.AG.ER | AG.ER.C1  | AG.ER.C1                | 1.027                    | 0.069 | 20100226.RT.SR | RT.SR.C1  | RT.SR.C1                | 1.021                    | 0.069 |
| 20100202.AG.ER | AG.ER.C2  | AG.ER.C2                | 1.024                    | 0.08  | 20100226.RT.SR | RT.SR.C2  | RT.SR.C2                | 0.959                    | 0.117 |
| 20100202.AG.ER | AG.ER.C3  | AG.ER.C3                | 1.042                    | 0.097 | 20100226.RT.SR | RT.SR.C3  | RT.SR.C3                | 0.755                    | 0.055 |
| 20100202.AG.ER | AG.ER.C4  | AG.ER.C4                | 1.1                      | 0.113 | 20100226.RT.SR | RT.SR.C4  | RT.SR.C4                | 0.822                    | 0.095 |
| 20100202.AG.ER | AG.ER.C5  | AG.ER.C5                | 0.96                     | 0.103 | 20100226.RT.SR | RT.SR.C5  | RT.SR.C5                | 0.733                    | 0.092 |
| 20100202.AG.ER | AG.ER.C6  | AG.ER.C6                | 0.985                    | 0.14  | 20100226.RT.SR | RT.SR.C6  | RT.SR.C6                | 0.221                    | 0.032 |
| 20100202.AG.ER | AG.ER.C7  | AG.ER.C7                | 0.833                    | 0.108 | 20100226.RT.SR | RT.SR.C7  | RT.SR.C7                | 0.13                     | 0.01  |
| 20100202.AG.ER | ER.C1     | 0.078125                | 1.01                     | 0.025 | 20100226.RT.SR | SR.C1     | 0.078125                | 1.13                     | 0.085 |
| 20100202.AG.ER | ER.C2     | 0.15625                 | 1.053                    | 0.037 | 20100226.RT.SR | SR.C2     | 0.15625                 | 1.069                    | 0.095 |
| 20100202.AG.ER | ER.C3     | 0.3125                  | 1.026                    | 0.038 | 20100226.RT.SR | SR.C3     | 0.3125                  | 1.168                    | 0.088 |
| 20100202.AG.ER | ER.C4     | 0.625                   | 1.019                    | 0.048 | 20100226.RT.SR | SR.C4     | 0.625                   | 1.183                    | 0.135 |
| 20100202.AG.ER | ER.C5     | 1.25                    | 1.001                    | 0.062 | 20100226.RT.SR | SR.C5     | 1.25                    | 1.23                     | 0.091 |
| 20100202.AG.ER | ER.C6     | 2.5                     | 0.969                    | 0.069 | 20100226.RT.SR | SR.C6     | 2.5                     | 1.174                    | 0.052 |
| 20100202.AG.ER | ER.C7     | 5                       | 0.949                    | 0.114 | 20100226.RT.SR | SR.C7     | 5                       | 1.109                    | 0.085 |
| 20100202.AG.GF | AG.C1     | 0.078125                | 1.027                    | 0.034 | 20100226.SL.SR | SL.C1     | 0.078125                | 1.082                    | 0.018 |
| 20100202.AG.GF | AG.C2     | 0.15625                 | 1.053                    | 0.071 | 20100226.SL.SR | SL.C2     | 0.15625                 | 0.961                    | 0.058 |
| 20100202.AG.GF | AG.C3     | 0.3125                  | 1.052                    | 0.059 | 20100226.SL.SR | SL.C3     | 0.3125                  | 0.992                    | 0.067 |
| 20100202.AG.GF | AG.C4     | 0.625                   | 0.967                    | 0.03  | 20100226.SL.SR | SL.C4     | 0.625                   | 1.054                    | 0.048 |
| 20100202.AG.GF | AG.C5     | 1.25                    | 0.972                    | 0.046 | 20100226.SL.SR | SL.C5     | 1.25                    | 1.038                    | 0.092 |
| 20100202.AG.GF | AG.C6     | 2.5                     | 0.955                    | 0.082 | 20100226.SL.SR | SL.C6     | 2.5                     | 1.065                    | 0.06  |
| 20100202.AG.GF | AG.C7     | 5                       | 0.861                    | 0.051 | 20100226.SL.SR | SL.C7     | 5                       | 1.01                     | 0.074 |
| 20100202.AG.GF | AG.GFC1   | AG.GFC1                 | 0.895                    | 0.072 | 20100226.SL.SR | SL.SR.C1  | SL.SR.C1                | 1.121                    | 0.128 |
| 20100202.AG.GF | AG.GFC2   | AG.GFC2                 | 0.895                    | 0.078 | 20100226.SL.SR | SL.SR.C2  | SL.SR.C2                | 0.987                    | 0.079 |
| 20100202.AG.GF | AG.GFC3   | AG.GFC3                 | 0.857                    | 0.077 | 20100226.SL.SR | SL.SR.C3  | SL.SR.C3                | 1.07                     | 0.157 |
| 20100202.AG.GF | AG.GFC4   | AG.GFC4                 | 0.938                    | 0.083 | 20100226.SL.SR | SL.SR.C4  | SL.SR.C4                | 0.967                    | 0.1   |
| 20100202.AG.GF | AG.GFC5   | AG.GFC5                 | 0.799                    | 0.05  | 20100226.SL.SR | SL.SR.C5  | SL.SR.C5                | 0.967                    | 0.124 |
| 20100202.AG.GF | AG.GFC6   | AG.GFC6                 | 0.552                    | 0.062 | 20100226.SL.SR | SL.SR.C6  | SL.SR.C6                | 0.922                    | 0.086 |
| 20100202.AG.GF | AG.GFC7   | AG.GFC7                 | 0.24                     | 0.023 | 20100226.SL.SR | SL.SR.C7  | SL.SR.C7                | 0.868                    | 0.107 |
| 20100202.AG.GF | GF.C1     | 0.3125                  | 1.001                    | 0.04  | 20100226.SL.SR | SR.C1     | 0.078125                | 1.13                     | 0.085 |
| 20100202.AG.GF | GF.C2     | 0.625                   | 0.976                    | 0.063 | 20100226.SL.SR | SR.C2     | 0.15625                 | 1.069                    | 0.095 |
| 20100202.AG.GF | GF.C3     | 1.25                    | 1.042                    | 0.113 | 20100226.SL.SR | SR.C3     | 0.3125                  | 1.168                    | 0.088 |
| 20100202.AG.GF | GF.C4     | 2.5                     | 0.93                     | 0.111 | 20100226.SL.SR | SR.C4     | 0.625                   | 1.183                    | 0.135 |
| 20100202.AG.GF | GF.C5     | 5                       | 0.903                    | 0.116 | 20100226.SL.SR | SR.C5     | 1.25                    | 1.23                     | 0.091 |
| 20100202.AG.GF | GF.C6     | 10                      | 0.702                    | 0.084 | 20100226.SL.SR | SR.C6     | 2.5                     | 1.174                    | 0.052 |
| 20100202.AG.GF | GF.C7     | 20                      | 0.366                    | 0.058 | 20100226.SL.SR | SR.C7     | 5                       | 1.109                    | 0.085 |

Table S3: **Combination index (CI) scores.** The CI scores calculated from cell viability based on cell metabolic activity measurements of pairwise drug perturbations. CI scores were determined at EC50 levels. Standard deviation (Stdev) was based on CI scores determined at EC45, EC50, and EC55. In some cases the CI scores could not be determined ('nan').

| Inhibitor | Inhibitor | CI     | Stdev  | Category     |
|-----------|-----------|--------|--------|--------------|
| IGF1Ri    | AKTi      | 1.157  | 0.3078 | Additive     |
| IGF1Ri    | ERKi      | nan    | nan    | nan          |
| IGF1Ri    | EGFRi     | 0.7361 | 0.0043 | Synergistic  |
| IGF1Ri    | HDACi     | 0.901  | 0.0003 | Additive     |
| IGF1Ri    | PDGFRi    | 0.8427 | 0.0165 | Additive     |
| IGF1Ri    | PKCi      | 0.8149 | 0.1963 | Additive     |
| IGF1Ri    | CDK4i     | 0.7001 | 0.0081 | Synergistic  |
| IGF1Ri    | MEKi      | nan    | nan    | nan          |
| IGF1Ri    | STAT3i    | 0.5702 | nan    | Synergistic  |
| IGF1Ri    | METi      | 1.2795 | 0.152  | Additive     |
| AKTi      | ERKi      | 1.3997 | 0.081  | Additive     |
| AKTi      | EGFRi     | 0.7748 | 0.0135 | Additive     |
| AKTi      | HDACi     | 1.9544 | 0.0254 | Antagonistic |
| AKTi      | PDGFRi    | 0.872  | 0.0636 | Additive     |
| AKTi      | PI3Ki     | 1.1347 | 0.0537 | Additive     |
| AKTi      | CDK4i     | 1.3034 | 0.0122 | Additive     |
| AKTi      | MEKi      | 0.72   | 0.0366 | Synergistic  |
| AKTi      | SRCi      | 1.0627 | 0.0093 | Additive     |
| AKTi      | STAT3i    | 1.657  | 0.0935 | Antagonistic |
| AKTi      | METi      | 1.0496 | 0.0435 | Additive     |
| ERKi      | EGFRi     | 0.8468 | 0.0092 | Additive     |
| ERKi      | HDACi     | 0.7098 | 0.0213 | Synergistic  |
| ERKi      | PDGFRi    | 1.5091 | 0.0539 | Antagonistic |
| ERKi      | PI3Ki     | 1.2268 | 0.015  | Additive     |
| ERKi      | CDK4i     | 1.0053 | 0.0011 | Additive     |
| ERKi      | MEKi      | nan    | nan    | nan          |
| ERKi      | SRCi      | nan    | nan    | nan          |
| ERKi      | STAT3i    | 1.5643 | 0.1973 | Antagonistic |
| ERKi      | METi      | 0.6513 | 0.0594 | Synergistic  |
| EGFRi     | HDACi     | 1.5375 | 0.0235 | Antagonistic |
| EGFRi     | PDGFRi    | 0.9581 | 0.0506 | Additive     |
| EGFRi     | PI3Ki     | 0.9142 | 0.0055 | Additive     |
| EGFRi     | PKCi      | 1.0881 | 0.0245 | Additive     |
| EGFRi     | CDK4i     | 1.1421 | 0.0331 | Additive     |
| EGFRi     | MEKi      | 0.8693 | 0.0167 | Additive     |
| EGFRi     | SRCi      | 0.9859 | 0.0438 | Additive     |
| EGFRi     | STAT3i    | 0.964  | 0.0051 | Additive     |
| EGFRi     | METi      | 0.8792 | 0.0103 | Additive     |
| HDACi     | PDGFRi    | 1.0499 | 0.0181 | Additive     |
| HDACi     | PI3Ki     | 2.8475 | 0.1523 | Antagonistic |
| HDACi     | PKCi      | 1.7978 | 0.0255 | Antagonistic |
| HDACi     | CDK4i     | 1.1389 | 0.0143 | Additive     |
| HDACi     | MEKi      | 0.9775 | 0.0042 | Additive     |
| HDACi     | SRCi      | 1.1415 | 0.0156 | Additive     |
| HDACi     | STAT3i    | 1.1668 | 0.0095 | Additive     |
| HDACi     | METi      | 1.1827 | 0.0571 | Additive     |
| PDGFRi    | PI3Ki     | 1.2518 | 0.0199 | Additive     |



| <b>Table S3 continued</b> |                  |           |              |                 |
|---------------------------|------------------|-----------|--------------|-----------------|
| <b>Inhibitor</b>          | <b>Inhibitor</b> | <b>CI</b> | <b>Stdev</b> | <b>Category</b> |
| PDGFRi                    | PKCi             | 1.1812    | 0.0199       | Additive        |
| PDGFRi                    | CDK4i            | 1.0959    | 0.0603       | Additive        |
| PDGFRi                    | MEKi             | 0.7468    | 0.0495       | Synergistic     |
| PDGFRi                    | SRCi             | 0.9484    | 0.007        | Additive        |
| PDGFRi                    | STAT3i           | 1.0543    | 0.0088       | Additive        |
| PDGFRi                    | METi             | 1.2437    | 0.0253       | Additive        |
| PI3Ki                     | PKCi             | 0.9728    | 0.0118       | Additive        |
| PI3Ki                     | CDK4i            | 0.9725    | 0.0124       | Additive        |
| PI3Ki                     | MEKi             | 0.6716    | 0.0651       | Synergistic     |
| PI3Ki                     | SRCi             | 1.1896    | 0.1729       | Additive        |
| PI3Ki                     | STAT3i           | 1.2176    | 0.067        | Additive        |
| PI3Ki                     | METi             | 1.3977    | 0.0073       | Additive        |
| PKCi                      | CDK4i            | 1.9796    | 0.0881       | Antagonistic    |
| PKCi                      | SRCi             | 1.1668    | 0.0086       | Additive        |
| PKCi                      | STAT3i           | 1.1716    | 0.0781       | Additive        |
| PKCi                      | METi             | 1.1029    | 0.0944       | Additive        |
| CDK4i                     | MEKi             | 1.1092    | 0.0121       | Additive        |
| CDK4i                     | SRCi             | 1.3244    | 0.064        | Additive        |
| CDK4i                     | STAT3i           | 0.873     | 0.008        | Additive        |
| CDK4i                     | METi             | 1.8164    | 0.1565       | Antagonistic    |
| MEKi                      | SRCi             | nan       | nan          | nan             |
| MEKi                      | STAT3i           | 0.9767    | 0.0017       | Additive        |
| MEKi                      | METi             | 0.5325    | nan          | Synergistic     |
| SRCi                      | STAT3i           | 0.9545    | 0.0069       | Additive        |
| SRCi                      | METi             | 1.3005    | 0.0954       | Additive        |
| STAT3i                    | METi             | 1.3147    | 0.1032       | Additive        |

Table S4: **Drugs used in follow-up experiments.** Drugs used in follow-up experiments are listed and the concentrations used for Western blotting (WB) and cell viability based on cell metabolic activity measurements are indicated. \*Indicates the concentrations used in dose-response cell viability experiments with 2 fold serial dilutions unless otherwise stated.

| <b>Drug</b> | <b>Targets</b> | <b>Company</b> | <b>Product#</b> | <b>Conc</b><br>(WB) | <b>Conc*</b><br>(cell viability) |
|-------------|----------------|----------------|-----------------|---------------------|----------------------------------|
| AZD6244     | MEK1           | Selleckchem    | 1008            |                     | 1 $\mu$ M                        |
| Erlotinib   | EGFR/HER1      | Selleckchem    | 1023            |                     | 25.6 — 0.4 $\mu$ M               |
| FR180204    | ERK1/2         | EMD Millipore  | 328007          |                     | 2.5 $\mu$ M                      |
| MK2206      | AKT1/2/3       | Selleckchem    | 1078            |                     | 16 — 0.25 $\mu$ M                |
| NVP-AEW541  | IGF1R          | Selleckchem    | 1034            | 1 $\mu$ M           | 1 $\mu$ M                        |
| PD0332991   | CDK4/6         | Selleckchem    | 1116            | 1 $\mu$ M           | 6.4 — 0.1 $\mu$ M                |
| R1507       | IGF1R          |                |                 | 10 $\mu$ g/ml       | 16 — 0.25 $\mu$ g/ml             |

Table S5: **Interactions in the prior knowledge network.** This table lists source and target nodes in the prior knowledge network and references to their interactions. For relationships involving the same protein (e.g., AKT — AKT-pSer<sup>473</sup>), the references refers to the reported effect of the phosphorylation site on the activity of the protein.

| Source                                          | Target                                          | Reference |
|-------------------------------------------------|-------------------------------------------------|-----------|
| 4EBP1_pSer <sup>65</sup>                        | cell.viability                                  | (60)      |
| AKT                                             | AKT_pSer <sup>473</sup>                         | (61)      |
| AKT_pSer <sup>473</sup>                         | 4EBP1_pSer <sup>65</sup>                        | (62)      |
| AKT_pSer <sup>473</sup>                         | GSK3a_b_pSer <sup>21</sup>                      | (63,64)   |
| AKT_pSer <sup>473</sup>                         | STAT3_pTyr <sup>705</sup>                       | (65)      |
| AKT_pSer <sup>473</sup>                         | p70S6K_pThr <sup>389</sup>                      | (66)      |
| CDK4                                            | RB_pSer <sup>807</sup>                          | (67)      |
| EGFR                                            | EGFR_pTyr <sup>992</sup>                        | (68)      |
| EGFR_pTyr <sup>992</sup>                        | MEK1_2_pSer <sup>217</sup>                      | (69,70)   |
| ERK                                             | ERK1_2_pThr <sup>202</sup> _pTyr <sup>204</sup> | (71)      |
| GSK3a_b_pSer <sup>21</sup>                      | RB_pSer <sup>807</sup>                          | (72)      |
| HDAC                                            | RB_pSer <sup>807</sup>                          | (73)      |
| IGFR                                            | IGFRB                                           | (74)      |
| IGFRB                                           | AKT_pSer <sup>473</sup>                         | (75)      |
| IGFRB                                           | MEK1_2_pSer <sup>217</sup>                      | (76)      |
| ERK1_2_pThr <sup>202</sup> _pTyr <sup>204</sup> | cell.viability                                  | (77)      |
| ERK1_2_pThr <sup>202</sup> _pTyr <sup>204</sup> | p70S6K_pThr <sup>389</sup>                      | (78)      |
| MEK                                             | MEK1_2_pSer <sup>217</sup>                      | (79)      |
| MEK1_2_pSer <sup>217</sup>                      | ERK1_2_pThr <sup>202</sup> _pTyr <sup>204</sup> | (80)      |
| MET                                             | MEK1_2_pSer <sup>217</sup>                      | (81)      |
| PDGFR                                           | AKT_pSer <sup>473</sup>                         | (82)      |
| PI3K                                            | AKT_pSer <sup>473</sup>                         | (83)      |
| PKC                                             | PKCa_pSer <sup>657</sup>                        | (84)      |
| PKCa_pSer <sup>657</sup>                        | p70S6K_pThr <sup>389</sup>                      | (85)      |
| RB_pSer <sup>807</sup>                          | cell.viability                                  | (86)      |
| S6_pSer <sup>235</sup>                          | cell.viability                                  | (87)      |
| SRC                                             | SRC_pTyr <sup>527</sup>                         | (88)      |
| SRC_pTyr <sup>527</sup>                         | AKT_pSer <sup>473</sup>                         | (89,90)   |
| SRC_pTyr <sup>527</sup>                         | MEK1_2_pSer <sup>217</sup>                      | (91,92)   |
| STAT3                                           | STAT3_pTyr <sup>705</sup>                       | (93)      |
| STAT3_pTyr <sup>705</sup>                       | cell.viability                                  | (94)      |
| mTOR                                            | 4EBP1_pSer <sup>65</sup>                        | (60,95)   |
| p70S6K_pThr <sup>389</sup>                      | S6_pSer <sup>235</sup>                          | (96)      |

Table S6: **Bayesian-derived models have many interactions in common with BP-derived models.** Interactions derived using Bayesian modeling (58, 59) (BioLearn 1.0 software) with prior knowledge were compared to interactions present in the prior knowledge network (In prior) and the BP models (In BP). For simplicity, the directionality and the sign of the interaction was ignored. The confidence score represents the percentage of interactions present in 100 model topologies (see **fig. S12** for more information). Only interactions present in more than 50% of the Bayesian-derived models are listed. Of the 32 most confident BioLearn interactions 22 were in common with the BP-derived models. This is a highly significant overlap as only  $4.4 \pm 2$  common interactions were recovered when drawing the 32 edges from random models of similar size as the average BP-derived network ( $p < 0.0001$ ).

| In prior | In BP | Interaction in Bayesian model                                                 | Confidence                       |
|----------|-------|-------------------------------------------------------------------------------|----------------------------------|
| Yes      | Yes   | ERK1_2.pThr <sup>202</sup> .pTyr <sup>204</sup> — p70S6K.pThr <sup>389</sup>  | 100% (82% forward, 18% backward) |
| No       | No    | aAKT —> EGFR.pTyr <sup>992</sup>                                              | 100%                             |
| No       | No    | aCDK4 —> PKCa.pSer <sup>657</sup>                                             | 100%                             |
| Yes      | Yes   | aCDK4 —> RB.pSer <sup>807</sup>                                               | 100%                             |
| No       | Yes   | aMEK —> RB.pSer <sup>807</sup>                                                | 100%                             |
| No       | Yes   | aMET —> RB.pSer <sup>807</sup>                                                | 100%                             |
| No       | Yes   | amTOR —> viability                                                            | 100%                             |
| No       | No    | MEK1_2.pSer <sup>217</sup> —> STAT3.pTyr <sup>705</sup>                       | 100% (94% forward, 6% backward)  |
| No       | Yes   | 4EBP1.pSer <sup>65</sup> —> GSK3a.b.pSer <sup>21</sup>                        | 100% (92% forward, 8% backward)  |
| No       | Yes   | IGFRB —> STAT3.pTyr <sup>705</sup>                                            | 100% (91% forward, 9% backward)  |
| Yes      | Yes   | p70S6K.pThr <sup>389</sup> —> AKT.pSer <sup>473</sup>                         | 99% (95% forward, 4% backward)   |
| No       | No    | 4EBP1.pSer <sup>65</sup> —> RB.pSer <sup>807</sup>                            | 98%                              |
| Yes      | Yes   | p70S6K.pThr <sup>389</sup> —> S6.pSer <sup>235</sup>                          | 98% (95% forward, 3% backward)   |
| No       | Yes   | aMEK —> ERK1_2.pThr <sup>202</sup> .pTyr <sup>204</sup>                       | 97%                              |
| Yes      | Yes   | AKT.pSer <sup>473</sup> —> SRC.pTyr <sup>527</sup>                            | 97% (95% forward, 2% backward)   |
| No       | Yes   | SRC.pTyr <sup>527</sup> — GSK3a.b.pSer <sup>21</sup>                          | 96% (71% forward, 25% backward)  |
| Yes      | Yes   | aAKT —> AKT.pSer <sup>473</sup>                                               | 96%                              |
| Yes      | No    | aIGFR —> AKT.pSer <sup>473</sup>                                              | 96%                              |
| Yes      | Yes   | MEK1_2.pSer <sup>217</sup> —> EGFR.pTyr <sup>992</sup>                        | 95% (88% forward, 7% backward)   |
| No       | No    | MEK1_2.pSer <sup>217</sup> —> 4EBP1.pSer <sup>65</sup>                        | 95% (86% forward, 9% backward)   |
| No       | No    | aMET —> S6.pSer <sup>235</sup>                                                | 94%                              |
| No       | Yes   | aEGFR —> IGFRB                                                                | 93%                              |
| No       | Yes   | aIGFR —> 4EBP1.pSer <sup>65</sup>                                             | 88%                              |
| Yes      | Yes   | IGFRB —> MEK1_2.pSer <sup>217</sup>                                           | 82% (78% forward, 4% backward)   |
| Yes      | No    | aIGFR —> IGFRB                                                                | 80%                              |
| No       | Yes   | aMET —> p70S6K.pThr <sup>389</sup>                                            | 80%                              |
| No       | No    | aSRC —> MEK1_2.pSer <sup>217</sup>                                            | 80%                              |
| No       | No    | aMEK —> viability                                                             | 76%                              |
| Yes      | Yes   | MEK1_2.pSer <sup>217</sup> —> ERK1_2.pThr <sup>202</sup> .pTyr <sup>204</sup> | 74% (73% forward, 1% backward)   |
| No       | Yes   | IGFRB —> PKCa.pSer <sup>657</sup>                                             | 71% (70% forward, 1% backward)   |
| No       | Yes   | aHDAC —> PKCa.pSer <sup>657</sup>                                             | 70%                              |
| Yes      | Yes   | MEK1_2.pSer <sup>217</sup> —> SRC.pTyr <sup>527</sup>                         | 60% (58% forward, 2% backward)   |
